# Supplementary material
Source: publisher figshare collection journal article supplement (https://gsajournals.figshare.com/articles/dataset/_/7887698)
Supplement: Supplementary file 1 [file 1]

## Sheet: gls_all_2
plot	line	seed_source	block	plot.unique	entry	population	pop	loc	rep	range	column	gls_score1	gls_score2	gls_audpc
45254	H100_DRIL62.078F2_5	Chile16_88_5	1	1	605	H100_DRIL62.078F2	9	AN	1	11	14	.	6	6
45255	H100_DRIL62.078F2_66	Chile16_91_9	1	2	666	H100_DRIL62.078F2	9	AN	1	11	15	8	6	7
45256	H100_DRIL62.078F2_1	Chile16_88_1	1	3	601	H100_DRIL62.078F2	9	AN	1	11	16	7.5	6	6.75
45257	H100_DRIL62.078F2_65	Chile16_91_8	1	4	665	H100_DRIL62.078F2	9	AN	1	11	17	7.5	5.5	6.5
45258	H100_DRIL62.078F2_71	Chile16_92_2	1	5	671	H100_DRIL62.078F2	9	AN	1	11	18	8	7	7.5
45259	H100_DRIL62.078F2_84	Chile16_92_15	1	6	684	H100_DRIL62.078F2	9	AN	1	11	19	8	7	7.5
45260	H100_DRIL62.078F2_59	Chile16_91_2	1	7	659	H100_DRIL62.078F2	9	AN	1	11	20	8	6	7
45261	H100_DRIL62.078F2_56	Chile16_93_10	1	8	656	H100_DRIL62.078F2	9	AN	1	11	21	7.5	6	6.75
45262	H100_DRIL62.078F2_75	Chile16_92_6	1	9	675	H100_DRIL62.078F2	9	AN	1	11	22	7.5	5.5	6.5
45263	H100_DRIL62.078F2_27	Chile16_90_12	1	10	627	H100_DRIL62.078F2	9	AN	1	11	23	7.5	7	7.25
45264	H100_DRIL62.078F2_14	Chile16_88_14	1	11	614	H100_DRIL62.078F2	9	AN	1	11	24	7.5	7	7.25
45265	H100_DRIL62.078F2_70	Chile16_92_1	1	12	670	H100_DRIL62.078F2	9	AN	1	12	24	8	7	7.5
45266	H100_DRIL62.078F2_55	Chile16_93_9	1	13	655	H100_DRIL62.078F2	9	AN	1	12	23	8	7	7.5
45268	H100	'	1	15	970	H100	9	AN	1	12	21	7.5	3.5	5.5
45269	H100_DRIL62.078F2_68	Chile16_91_11	2	16	668	H100_DRIL62.078F2	9	AN	1	12	20	7.5	5	6.25
45270	H100_DRIL62.078F2_37	Chile16_89_9	2	17	637	H100_DRIL62.078F2	9	AN	1	12	19	7.5	5.5	6.5
45271	H100_DRIL62.078F2_72	Chile16_92_3	2	18	672	H100_DRIL62.078F2	9	AN	1	12	18	7.5	5	6.25
45273	H100_DRIL62.078F2_60	Chile16_91_3	2	20	660	H100_DRIL62.078F2	9	AN	1	12	16	7.5	4	5.75
45276	H100_DRIL62.078F2_83	Chile16_92_14	2	23	683	H100_DRIL62.078F2	9	AN	1	12	13	8	7	7.5
45279	H100_DRIL62.078F2_7	Chile16_88_7	2	26	607	H100_DRIL62.078F2	9	AN	1	12	10	7.5	6	6.75
45280	H100_DRIL62.078F2_20	Chile16_90_5	2	27	620	H100_DRIL62.078F2	9	AN	1	12	9	8	5.5	6.75
45281	H100_DRIL62.078F2_13	Chile16_88_13	2	28	613	H100_DRIL62.078F2	9	AN	1	12	8	7.5	4	5.75
45282	H100_DRIL62.078F2_74	Chile16_92_5	2	29	674	H100_DRIL62.078F2	9	AN	1	12	7	8	6.5	7.25
45283	H100_DRIL62.078F2_73	Chile16_92_4	2	30	673	H100_DRIL62.078F2	9	AN	1	12	6	7.5	5.5	6.5
45284	H100_DRIL62.078F2_76	Chile16_92_7	3	31	676	H100_DRIL62.078F2	9	AN	1	12	5	7.5	5.5	6.5
45285	H100_DRIL62.078F2_40	Chile16_89_12	3	32	640	H100_DRIL62.078F2	9	AN	1	12	4	7.5	5.5	6.5
45286	H100_DRIL62.078F2_18	Chile16_90_3	3	33	618	H100_DRIL62.078F2	9	AN	1	12	3	8	7	7.5
45287	H100_DRIL62.078F2_8	Chile16_88_8	3	34	608	H100_DRIL62.078F2	9	AN	1	12	2	8	5	6.5
45288	H100_DRIL62.078F2_9	Chile16_88_9	3	35	609	H100_DRIL62.078F2	9	AN	1	12	1	8	7	7.5
45289	H100_DRIL62.078F2_87	Chile16_92_18	3	36	687	H100_DRIL62.078F2	9	AN	1	13	1	7.5	4	5.75
45290	H100_DRIL62.078F2_29	Chile16_89_1	3	37	629	H100_DRIL62.078F2	9	AN	1	13	2	8	6	7
45291	H100_DRIL62.078F2_79	Chile16_92_10	3	38	679	H100_DRIL62.078F2	9	AN	1	13	3	7.5	6	6.75
45292	H100_DRIL62.078F2_15	Chile16_88_15	3	39	615	H100_DRIL62.078F2	9	AN	1	13	4	.	6	6
45294	H100_DRIL62.078F2_81	Chile16_92_12	3	41	681	H100_DRIL62.078F2	9	AN	1	13	6	7.5	6	6.75
45295	H100	'	4	42	970	H100	9	AN	1	13	7	7	5.5	6.25
45296	H100_DRIL62.078F2_35	Chile16_89_7	4	43	635	H100_DRIL62.078F2	9	AN	1	13	8	7.5	6	6.75
45297	H100_DRIL62.078F2_2	Chile16_88_2	4	44	602	H100_DRIL62.078F2	9	AN	1	13	9	7.5	5.5	6.5
45298	H100_DRIL62.078F2_62	Chile16_91_5	4	45	662	H100_DRIL62.078F2	9	AN	1	13	10	8	5.5	6.75
45299	H100_DRIL62.078F2_12	Chile16_88_12	4	46	612	H100_DRIL62.078F2	9	AN	1	13	11	8	6	7
45300	H100_DRIL62.078F2_78	Chile16_92_9	4	47	678	H100_DRIL62.078F2	9	AN	1	13	12	8	6	7
45301	H100_DRIL62.078F2_30	Chile16_89_2	4	48	630	H100_DRIL62.078F2	9	AN	1	13	13	8	6.5	7.25
45303	H100_DRIL62.078F2_25	Chile16_90_10	4	50	625	H100_DRIL62.078F2	9	AN	1	13	15	7.5	5.5	6.5
45304	H100_DRIL62.078F2_33	Chile16_89_5	4	51	633	H100_DRIL62.078F2	9	AN	1	13	16	8	5.5	6.75
45305	H100_DRIL62.078F2_10	Chile16_88_10	4	52	610	H100_DRIL62.078F2	9	AN	1	13	17	7.5	5	6.25
45306	H100_DRIL62.078F2_48	Chile16_93_2	4	53	648	H100_DRIL62.078F2	9	AN	1	13	18	8	6.5	7.25
45307	H100_DRIL62.078F2_17	Chile16_90_2	5	54	617	H100_DRIL62.078F2	9	AN	1	13	19	7.5	6	6.75
45308	H100_DRIL62.078F2_38	Chile16_89_10	5	55	638	H100_DRIL62.078F2	9	AN	1	13	20	8	7	7.5
45309	H100_DRIL62.078F2_52	Chile16_93_6	5	56	652	H100_DRIL62.078F2	9	AN	1	13	21	8	6	7
45310	H100_DRIL62.078F2_24	Chile16_90_9	5	57	624	H100_DRIL62.078F2	9	AN	1	13	22	7.5	7.5	7.5
45311	DRIL62.078	'	5	58	965	DRIL62.078	9	AN	1	13	23	.	7.5	7.5
45312	H100_DRIL62.078F2_11	Chile16_88_11	5	59	611	H100_DRIL62.078F2	9	AN	1	13	24	8	6.5	7.25
45313	H100_DRIL62.078F2_54	Chile16_93_8	5	60	654	H100_DRIL62.078F2	9	AN	1	14	24	7.5	6	6.75
45314	H100_DRIL62.078F2_6	Chile16_88_6	5	61	606	H100_DRIL62.078F2	9	AN	1	14	23	8	7	7.5
45315	H100_DRIL62.078F2_50	Chile16_93_4	5	62	650	H100_DRIL62.078F2	9	AN	1	14	22	8	5.5	6.75
45316	H100_DRIL62.156F2_25	Chile16_102_6	5	63	712	H100_DRIL62.156F2	10	AN	1	14	21	8	6.5	7.25
45317	H100_DRIL62.156F2_5	Chile16_100_5	5	64	692	H100_DRIL62.156F2	10	AN	1	14	20	7.5	5	6.25
45318	H100_DRIL62.156F2_21	Chile16_102_2	5	65	708	H100_DRIL62.156F2	10	AN	1	14	19	7.5	5.5	6.5
45319	H100_DRIL62.156F2_7	Chile16_100_7	5	66	694	H100_DRIL62.156F2	10	AN	1	14	18	.	5.5	5.5
45320	H100_DRIL62.156F2_60	Chile16_105_9	5	67	747	H100_DRIL62.156F2	10	AN	1	14	17	8	6	7
45321	H100_DRIL62.156F2_27	Chile16_102_8	5	68	714	H100_DRIL62.156F2	10	AN	1	14	16	8	6	7
45322	H100_DRIL62.156F2_19	Chile16_101_9	6	69	706	H100_DRIL62.156F2	10	AN	1	14	15	8	5.5	6.75
45323	H100_DRIL62.156F2_32	Chile16_102_13	6	70	719	H100_DRIL62.156F2	10	AN	1	14	14	8	5	6.5
45324	H100_DRIL62.156F2_42	Chile16_103_10	6	71	729	H100_DRIL62.156F2	10	AN	1	14	13	8	5	6.5
45325	H100_DRIL62.156F2_18	Chile16_101_8	6	72	705	H100_DRIL62.156F2	10	AN	1	14	12	.	5.5	5.5
45327	H100_DRIL62.156F2_51	Chile16_104_9	6	74	738	H100_DRIL62.156F2	10	AN	1	14	10	8	5.5	6.75
45328	H100_DRIL62.156F2_46	Chile16_104_4	6	75	733	H100_DRIL62.156F2	10	AN	1	14	9	7.5	5.5	6.5
45329	H100_DRIL62.156F2_1	Chile16_100_1	6	76	688	H100_DRIL62.156F2	10	AN	1	14	8	7.5	5.5	6.5
45330	H100_DRIL62.156F2_11	Chile16_101_1	6	77	698	H100_DRIL62.156F2	10	AN	1	14	7	7.5	5.5	6.5
45331	H100_DRIL62.156F2_63	Chile16_105_12	6	78	750	H100_DRIL62.156F2	10	AN	1	14	6	8	6	7
45332	H100	'	6	79	970	H100	10	AN	1	14	5	7.5	3	5.25
45334	H100_DRIL62.156F2_12	Chile16_101_2	6	81	699	H100_DRIL62.156F2	10	AN	1	14	3	7.5	5.5	6.5
45335	H100_DRIL62.156F2_38	Chile16_103_6	6	82	725	H100_DRIL62.156F2	10	AN	1	14	2	7.5	5.5	6.5
45336	H100_DRIL62.156F2_62	Chile16_105_11	6	83	749	H100_DRIL62.156F2	10	AN	1	14	1	7.5	5.5	6.5
45337	H100_DRIL62.156F2_61	Chile16_105_10	6	84	748	H100_DRIL62.156F2	10	AN	1	15	1	7.5	7	7.25
45338	DRIL62.156	'	7	85	966	DRIL62.156	10	AN	1	15	2	7.5	5	6.25
45339	H100_DRIL62.156F2_44	Chile16_104_2	7	86	731	H100_DRIL62.156F2	10	AN	1	15	3	7.5	6	6.75
45340	H100_DRIL62.156F2_28	Chile16_102_9	7	87	715	H100_DRIL62.156F2	10	AN	1	15	4	.	6	6
45342	H100_DRIL62.156F2_39	Chile16_103_7	7	89	726	H100_DRIL62.156F2	10	AN	1	15	6	8	6	7
45343	H100_DRIL62.156F2_45	Chile16_104_3	7	90	732	H100_DRIL62.156F2	10	AN	1	15	7	8	6.5	7.25
45345	H100	'	7	92	970	H100	10	AN	1	15	9	7.5	5	6.25
45346	H100_DRIL62.156F2_53	Chile16_105_2	7	93	740	H100_DRIL62.156F2	10	AN	1	15	10	7.5	5.5	6.5
45347	H100_DRIL62.156F2_43	Chile16_104_1	7	94	730	H100_DRIL62.156F2	10	AN	1	15	11	8	6	7
45348	H100_DRIL62.156F2_58	Chile16_105_7	7	95	745	H100_DRIL62.156F2	10	AN	1	15	12	8	6.5	7.25
45349	H100_DRIL62.156F2_57	Chile16_105_6	7	96	744	H100_DRIL62.156F2	10	AN	1	15	13	7.5	6	6.75
45350	H100_DRIL62.156F2_13	Chile16_101_3	7	97	700	H100_DRIL62.156F2	10	AN	1	15	14	8	6	7
45351	H100_DRIL62.156F2_10	Chile16_100_10	7	98	697	H100_DRIL62.156F2	10	AN	1	15	15	.	6.5	6.5
45354	H100_DRIL62.156F2_55	Chile16_105_4	8	100	742	H100_DRIL62.156F2	10	AN	1	15	18	8	6.5	7.25
45355	H100_DRIL62.156F2_15	Chile16_101_5	8	101	702	H100_DRIL62.156F2	10	AN	1	15	19	7.5	6	6.75
45356	H100	'	8	102	970	H100	10	AN	1	15	20	7.5	5	6.25
45357	H100_DRIL62.156F2_8	Chile16_100_8	8	103	695	H100_DRIL62.156F2	10	AN	1	15	21	7.5	5.5	6.5
45358	H100_DRIL62.156F2_35	Chile16_103_3	8	104	722	H100_DRIL62.156F2	10	AN	1	15	22	7.5	6.5	7
45359	H100_DRIL62.156F2_22	Chile16_102_3	8	105	709	H100_DRIL62.156F2	10	AN	1	15	23	7.5	5.5	6.5
45360	H100_DRIL62.156F2_31	Chile16_102_12	8	106	718	H100_DRIL62.156F2	10	AN	1	15	24	7.5	6	6.75
45361	H100_DRIL62.156F2_34	Chile16_103_2	8	107	721	H100_DRIL62.156F2	10	AN	1	16	24	7.5	5	6.25
45362	H100_DRIL72.061F2_32	Chile16_113_9	8	108	846	H100_DRIL72.061F2	12	AN	1	16	23	7.5	5.5	6.5
45363	H100_DRIL72.061F2_56	Chile16_116_3	8	109	870	H100_DRIL72.061F2	12	AN	1	16	22	.	6.5	6.5
45364	H100_DRIL72.061F2_29	Chile16_113_6	8	110	843	H100_DRIL72.061F2	12	AN	1	16	21	7.5	6.5	7
45365	H100_DRIL72.061F2_40	Chile16_115_5	8	111	854	H100_DRIL72.061F2	12	AN	1	16	20	7.5	6	6.75
45366	H100_DRIL72.061F2_23	Chile16_112_12	8	112	837	H100_DRIL72.061F2	12	AN	1	16	19	7.5	6	6.75
45367	H100_DRIL72.061F2_76	Chile16_117_9	9	113	890	H100_DRIL72.061F2	12	AN	1	16	18	7.5	5.5	6.5
45368	H100_DRIL72.061F2_36	Chile16_115_1	9	114	850	H100_DRIL72.061F2	12	AN	1	16	17	8	7	7.5
45369	H100_DRIL72.061F2_34	Chile16_113_11	9	115	848	H100_DRIL72.061F2	12	AN	1	16	16	8	6	7
45370	H100_DRIL72.061F2_77	Chile16_117_10	9	116	891	H100_DRIL72.061F2	12	AN	1	16	15	8	6	7
45371	H100_DRIL72.061F2_10	Chile16_114_10	9	117	824	H100_DRIL72.061F2	12	AN	1	16	14	7.5	6	6.75
45372	H100_DRIL72.061F2_50	Chile16_115_15	9	118	864	H100_DRIL72.061F2	12	AN	1	16	13	7.5	6.5	7
45373	H100_DRIL72.061F2_19	Chile16_112_8	9	119	833	H100_DRIL72.061F2	12	AN	1	16	12	.	5.5	5.5
45374	H100_DRIL72.061F2_16	Chile16_112_5	9	120	830	H100_DRIL72.061F2	12	AN	1	16	11	8	7	7.5
45375	H100	'	9	121	970	H100	12	AN	1	16	10	7.5	5.5	6.5
45376	H100_DRIL72.061F2_52	Chile16_115_17	9	122	866	H100_DRIL72.061F2	12	AN	1	16	9	7.5	5.5	6.5
45378	H100_DRIL72.061F2_3	Chile16_114_3	9	124	817	H100_DRIL72.061F2	12	AN	1	16	7	8	5	6.5
45379	H100_DRIL72.061F2_41	Chile16_115_6	9	125	855	H100_DRIL72.061F2	12	AN	1	16	6	8	6	7
45380	H100	'	10	126	970	H100	12	AN	1	16	5	7	3	5
45381	H100_DRIL72.061F2_14	Chile16_112_3	10	127	828	H100_DRIL72.061F2	12	AN	1	16	4	.	5.5	5.5
45382	H100_DRIL72.061F2_54	Chile16_116_1	10	128	868	H100_DRIL72.061F2	12	AN	1	16	3	7.5	6	6.75
45383	H100_DRIL72.061F2_42	Chile16_115_7	10	129	856	H100_DRIL72.061F2	12	AN	1	16	2	7	6.5	6.75
45384	H100_DRIL72.061F2_61	Chile16_116_8	10	130	875	H100_DRIL72.061F2	12	AN	1	16	1	7.5	6.5	7
45385	H100_DRIL72.061F2_62	Chile16_116_9	10	131	876	H100_DRIL72.061F2	12	AN	1	17	1	7.5	6.5	7
45386	H100_DRIL72.061F2_35	Chile16_113_12	10	132	849	H100_DRIL72.061F2	12	AN	1	17	2	7.5	5	6.25
45387	H100_DRIL72.061F2_69	Chile16_117_2	10	133	883	H100_DRIL72.061F2	12	AN	1	17	3	7.5	7	7.25
45388	H100_DRIL72.061F2_70	Chile16_117_3	10	134	884	H100_DRIL72.061F2	12	AN	1	17	4	7.5	6	6.75
45389	H100_DRIL72.061F2_58	Chile16_116_5	10	135	872	H100_DRIL72.061F2	12	AN	1	17	5	.	5	5
45390	H100_DRIL72.061F2_79	Chile16_117_12	10	136	893	H100_DRIL72.061F2	12	AN	1	17	6	7.5	5	6.25
45391	H100_DRIL72.061F2_57	Chile16_116_4	10	137	871	H100_DRIL72.061F2	12	AN	1	17	7	8	7	7.5
45392	H100_DRIL72.061F2_17	Chile16_112_6	10	138	831	H100_DRIL72.061F2	12	AN	1	17	8	8	5	6.5
45393	H100_DRIL72.061F2_25	Chile16_113_2	10	139	839	H100_DRIL72.061F2	12	AN	1	17	9	8	6.5	7.25
45394	H100_DRIL72.061F2_26	Chile16_113_3	10	140	840	H100_DRIL72.061F2	12	AN	1	17	10	8	7	7.5
45395	H100_DRIL72.061F2_21	Chile16_112_10	11	141	835	H100_DRIL72.061F2	12	AN	1	17	11	7.5	5.5	6.5
45396	H100_DRIL72.061F2_1	Chile16_114_1	11	142	815	H100_DRIL72.061F2	12	AN	1	17	12	8	6.5	7.25
45397	H100_DRIL72.061F2_8	Chile16_114_8	11	143	822	H100_DRIL72.061F2	12	AN	1	17	13	8	7	7.5
45398	H100_DRIL72.061F2_49	Chile16_115_14	11	144	863	H100_DRIL72.061F2	12	AN	1	17	14	8	7.5	7.75
45399	H100_DRIL72.061F2_71	Chile16_117_4	11	145	885	H100_DRIL72.061F2	12	AN	1	17	15	7.5	7	7.25
45400	H100	'	11	146	970	H100	12	AN	1	17	16	7.5	5	6.25
45401	H100_DRIL72.061F2_20	Chile16_112_9	11	147	834	H100_DRIL72.061F2	12	AN	1	17	17	.	5.5	5.5
45402	H100_DRIL72.061F2_66	Chile16_116_13	11	148	880	H100_DRIL72.061F2	12	AN	1	17	18	8	7	7.5
45403	H100_DRIL72.061F2_59	Chile16_116_6	11	149	873	H100_DRIL72.061F2	12	AN	1	17	19	7.5	5	6.25
45404	H100_DRIL72.061F2_9	Chile16_114_9	11	150	823	H100_DRIL72.061F2	12	AN	1	17	20	8	7.5	7.75
45405	H100_DRIL72.061F2_51	Chile16_115_16	11	151	865	H100_DRIL72.061F2	12	AN	1	17	21	8	7.5	7.75
45406	H100_DRIL72.061F2_68	Chile16_117_1	11	152	882	H100_DRIL72.061F2	12	AN	1	17	22	7.5	6.5	7
45407	H100_DRIL72.061F2_63	Chile16_116_10	11	153	877	H100_DRIL72.061F2	12	AN	1	17	23	7.5	5.5	6.5
45408	H100_DRIL72.061F2_31	Chile16_113_8	12	154	845	H100_DRIL72.061F2	12	AN	1	17	24	7.5	5.5	6.5
45409	H100_DRIL72.061F2_78	Chile16_117_11	12	155	892	H100_DRIL72.061F2	12	AN	1	18	24	8	7	7.5
45410	H100_DRIL72.061F2_37	Chile16_115_2	12	156	851	H100_DRIL72.061F2	12	AN	1	18	23	.	5	5
45411	H100_DRIL72.061F2_38	Chile16_115_3	12	157	852	H100_DRIL72.061F2	12	AN	1	18	22	7.5	6	6.75
45412	H100_DRIL72.061F2_13	Chile16_112_2	12	158	827	H100_DRIL72.061F2	12	AN	1	18	21	7.5	6.5	7
45413	H100_DRIL72.061F2_45	Chile16_115_10	12	159	859	H100_DRIL72.061F2	12	AN	1	18	20	7.5	5	6.25
45414	H100_DRIL72.061F2_47	Chile16_115_12	12	160	861	H100_DRIL72.061F2	12	AN	1	18	19	8	6.5	7.25
45415	H100_DRIL72.061F2_7	Chile16_114_7	12	161	821	H100_DRIL72.061F2	12	AN	1	18	18	8	6.5	7.25
45416	H100_DRIL72.061F2_15	Chile16_112_4	12	162	829	H100_DRIL72.061F2	12	AN	1	18	17	8	6	7
45417	H100_DRIL72.061F2_67	Chile16_116_14	12	163	881	H100_DRIL72.061F2	12	AN	1	18	16	.	6.5	6.5
45419	H100_DRIL72.061F2_46	Chile16_115_11	12	165	860	H100_DRIL72.061F2	12	AN	1	18	14	.	6	6
45420	H100	'	12	166	970	H100	4	AN	1	18	13	8	5	6.5
45421	H100_DRIL32.191F2_4	Chile16_48_4	12	167	223	H100_DRIL32.191F2	4	AN	1	18	12	8	4.5	6.25
45422	H100_DRIL32.191F2_44	Chile16_49_17	12	168	263	H100_DRIL32.191F2	4	AN	1	18	11	7.5	5	6.25
45423	H100_DRIL32.191F2_49	Chile16_50_5	12	169	268	H100_DRIL32.191F2	4	AN	1	18	10	8	6	7
45424	H100	'	12	170	970	H100	4	AN	1	18	9	7.5	4	5.75
45425	H100_DRIL32.191F2_9	Chile16_48_9	13	171	228	H100_DRIL32.191F2	4	AN	1	18	8	.	4	4
45426	H100_DRIL32.191F2_53	Chile16_50_9	13	172	272	H100_DRIL32.191F2	4	AN	1	18	7	7.5	6	6.75
45427	H100_DRIL32.191F2_2	Chile16_48_2	13	173	221	H100_DRIL32.191F2	4	AN	1	18	6	7.5	5.5	6.5
45428	H100_DRIL32.191F2_54	Chile16_50_10	13	174	273	H100_DRIL32.191F2	4	AN	1	18	5	7.5	6.5	7
45429	H100_DRIL32.191F2_16	Chile16_51_4	13	175	235	H100_DRIL32.191F2	4	AN	1	18	4	7.5	5.5	6.5
45430	H100_DRIL32.191F2_21	Chile16_51_9	13	176	240	H100_DRIL32.191F2	4	AN	1	18	3	7.5	5	6.25
45431	H100	'	13	177	970	H100	4	AN	1	18	2	7.5	4	5.75
45432	H100_DRIL32.191F2_83	Chile16_52_9	13	178	302	H100_DRIL32.191F2	4	AN	1	18	1	7.5	5.5	6.5
45433	H100_DRIL32.191F2_33	Chile16_49_6	13	179	252	H100_DRIL32.191F2	4	AN	1	19	1	7.5	5.5	6.5
45434	H100_DRIL32.191F2_45	Chile16_50_1	13	180	264	H100_DRIL32.191F2	4	AN	1	19	2	7.5	5.5	6.5
45435	H100_DRIL32.191F2_72	Chile16_47_15	13	181	291	H100_DRIL32.191F2	4	AN	1	19	3	7.5	5	6.25
45436	H100_DRIL32.191F2_82	Chile16_52_8	13	182	301	H100_DRIL32.191F2	4	AN	1	19	4	7	5	6
45437	H100_DRIL32.191F2_27	Chile16_51_15	13	183	246	H100_DRIL32.191F2	4	AN	1	19	5	7.5	4.5	6
45438	H100_DRIL32.191F2_42	Chile16_49_15	13	184	261	H100_DRIL32.191F2	4	AN	1	19	6	7.5	6	6.75
45439	H100_DRIL32.191F2_23	Chile16_51_11	13	185	242	H100_DRIL32.191F2	4	AN	1	19	7	7.5	6	6.75
45440	H100_DRIL32.191F2_7	Chile16_48_7	14	186	226	H100_DRIL32.191F2	4	AN	1	19	8	7.5	4.5	6
45441	H100_DRIL32.191F2_46	Chile16_50_2	14	187	265	H100_DRIL32.191F2	4	AN	1	19	9	7	5	6
45442	H100	'	14	188	970	H100	4	AN	1	19	10	7	4	5.5
45443	H100_DRIL32.191F2_20	Chile16_51_8	14	189	239	H100_DRIL32.191F2	4	AN	1	19	11	7.5	6	6.75
45444	H100_DRIL32.191F2_79	Chile16_52_5	14	190	298	H100_DRIL32.191F2	4	AN	1	19	12	.	6	6
45445	H100_DRIL32.191F2_22	Chile16_51_10	14	191	241	H100_DRIL32.191F2	4	AN	1	19	13	7.5	5	6.25
45446	H100_DRIL32.191F2_37	Chile16_49_10	14	192	256	H100_DRIL32.191F2	4	AN	1	19	14	7.5	5.5	6.5
45447	H100_DRIL32.191F2_55	Chile16_50_11	14	193	274	H100_DRIL32.191F2	4	AN	1	19	15	.	5.5	5.5
45448	H100_DRIL32.191F2_73	Chile16_47_16	14	194	292	H100_DRIL32.191F2	4	AN	1	19	16	.	4	4
45449	H100_DRIL32.191F2_3	Chile16_48_3	14	195	222	H100_DRIL32.191F2	4	AN	1	19	17	7.5	4.5	6
45451	H100_DRIL32.191F2_28	Chile16_49_1	14	197	247	H100_DRIL32.191F2	4	AN	1	19	19	7.5	4.5	6
45452	H100_DRIL32.191F2_25	Chile16_51_13	14	198	244	H100_DRIL32.191F2	4	AN	1	19	20	.	5.5	5.5
45453	H100_DRIL32.191F2_19	Chile16_51_7	14	199	238	H100_DRIL32.191F2	4	AN	1	19	21	.	6	6
45454	H100_DRIL32.191F2_81	Chile16_52_7	14	200	300	H100_DRIL32.191F2	4	AN	1	19	22	7.5	5	6.25
45456	H100_DRIL32.191F2_48	Chile16_50_4	15	201	267	H100_DRIL32.191F2	4	AN	1	19	24	7.5	6	6.75
45457	H100_DRIL32.191F2_8	Chile16_48_8	15	202	227	H100_DRIL32.191F2	4	AN	1	20	24	7	5	6
45458	H100_DRIL32.191F2_67	Chile16_47_10	15	203	286	H100_DRIL32.191F2	4	AN	1	20	23	7	5.5	6.25
45459	H100_DRIL32.191F2_70	Chile16_47_13	15	204	289	H100_DRIL32.191F2	4	AN	1	20	22	7	5	6
45460	H100_DRIL32.191F2_14	Chile16_51_2	15	205	233	H100_DRIL32.191F2	4	AN	1	20	21	7.5	5.5	6.5
45461	H100_DRIL32.191F2_76	Chile16_52_2	15	206	295	H100_DRIL32.191F2	4	AN	1	20	20	7.5	5.5	6.5
45462	H100_DRIL32.191F2_84	Chile16_52_10	15	207	303	H100_DRIL32.191F2	4	AN	1	20	19	.	5	5
45464	H100_DRIL32.191F2_11	Chile16_48_11	15	209	230	H100_DRIL32.191F2	4	AN	1	20	17	.	5	5
45465	H100_DRIL32.191F2_36	Chile16_49_9	15	210	255	H100_DRIL32.191F2	4	AN	1	20	16	7.5	5.5	6.5
45466	H100_DRIL32.191F2_29	Chile16_49_2	16	211	248	H100_DRIL32.191F2	4	AN	1	20	15	7	6	6.5
45468	H100_DRIL32.191F2_85	Chile16_52_11	16	213	304	H100_DRIL32.191F2	4	AN	1	20	13	7.5	5	6.25
45470	H100_DRIL32.191F2_51	Chile16_50_7	16	215	270	H100_DRIL32.191F2	4	AN	1	20	11	7	4	5.5
45471	H100_DRIL32.191F2_69	Chile16_47_12	16	216	288	H100_DRIL32.191F2	4	AN	1	20	10	7.5	6	6.75
45472	H100_DRIL32.191F2_64	Chile16_47_7	16	217	283	H100_DRIL32.191F2	4	AN	1	20	9	7	5	6
45473	H100_DRIL32.191F2_31	Chile16_49_4	16	218	250	H100_DRIL32.191F2	4	AN	1	20	8	7	4	5.5
45474	H100_DRIL32.191F2_66	Chile16_47_9	16	219	285	H100_DRIL32.191F2	4	AN	1	20	7	7.5	5.5	6.5
45475	H100_DRIL32.191F2_13	Chile16_51_1	16	220	232	H100_DRIL32.191F2	4	AN	1	20	6	7.5	5.5	6.5
45476	H100_DRIL32.191F2_30	Chile16_49_3	16	221	249	H100_DRIL32.191F2	4	AN	1	20	5	7	4	5.5
45477	H100_DRIL32.191F2_15	Chile16_51_3	16	222	234	H100_DRIL32.191F2	4	AN	1	20	4	7	5.5	6.25
45478	H100_DRIL32.191F2_60	Chile16_47_3	16	223	279	H100_DRIL32.191F2	4	AN	1	20	3	7	4	5.5
45479	H100	'	16	224	970	H100	4	AN	1	20	2	7	3	5
45480	H100_DRIL32.191F2_71	Chile16_47_14	16	225	290	H100_DRIL32.191F2	4	AN	1	20	1	7	5	6
45481	H100_DRIL32.191F2_47	Chile16_50_3	16	226	266	H100_DRIL32.191F2	4	AN	1	21	1	7	4	5.5
45482	DRIL32.191	'	17	227	960	DRIL32.191	4	AN	1	21	2	7	5	6
45483	H100_DRIL32.191F2_77	Chile16_52_3	17	228	296	H100_DRIL32.191F2	4	AN	1	21	3	7.5	4.5	6
45484	H100_DRIL52.157F2_27	Chile16_67_11	17	229	400	H100_DRIL52.157F2	6	AN	1	21	4	7	4	5.5
45485	H100_DRIL52.157F2_61	Chile16_66_11	17	230	434	H100_DRIL52.157F2	6	AN	1	21	5	7	4	5.5
45486	H100_DRIL52.157F2_9	Chile16_65_9	17	231	382	H100_DRIL52.157F2	6	AN	1	21	6	7	4	5.5
45487	H100	'	17	232	970	H100	6	AN	1	21	7	7	4	5.5
45488	H100_DRIL52.157F2_57	Chile16_66_7	17	233	430	H100_DRIL52.157F2	6	AN	1	21	8	7	4	5.5
45489	H100_DRIL52.157F2_36	Chile16_70_5	17	234	409	H100_DRIL52.157F2	6	AN	1	21	9	7	3.5	5.25
45490	H100_DRIL52.157F2_69	Chile16_69_1	17	235	442	H100_DRIL52.157F2	6	AN	1	21	10	7	3.5	5.25
45491	H100_DRIL52.157F2_17	Chile16_67_1	17	236	390	H100_DRIL52.157F2	6	AN	1	21	11	7	5.5	6.25
45493	H100_DRIL52.157F2_55	Chile16_66_5	17	238	428	H100_DRIL52.157F2	6	AN	1	21	13	7.5	5	6.25
45494	H100_DRIL52.157F2_41	Chile16_70_10	17	239	414	H100_DRIL52.157F2	6	AN	1	21	14	.	4	4
45495	H100_DRIL52.157F2_62	Chile16_66_12	17	240	435	H100_DRIL52.157F2	6	AN	1	21	15	7	5.5	6.25
45496	H100_DRIL52.157F2_84	Chile16_69_16	17	241	457	H100_DRIL52.157F2	6	AN	1	21	16	8.5	5	6.75
45497	H100_DRIL52.157F2_52	Chile16_66_2	18	242	425	H100_DRIL52.157F2	6	AN	1	21	17	7.5	5.5	6.5
45498	H100_DRIL52.157F2_81	Chile16_69_13	18	243	454	H100_DRIL52.157F2	6	AN	1	21	18	7.5	5.5	6.5
45499	H100_DRIL52.157F2_23	Chile16_67_7	18	244	396	H100_DRIL52.157F2	6	AN	1	21	19	7.5	5.5	6.5
45500	H100_DRIL52.157F2_49	Chile16_70_18	18	245	422	H100_DRIL52.157F2	6	AN	1	21	20	7	5	6
45501	H100_DRIL52.157F2_97	Chile16_68_12	18	246	470	H100_DRIL52.157F2	6	AN	1	21	21	7	5.5	6.25
45502	H100_DRIL52.157F2_3	Chile16_65_3	18	247	376	H100_DRIL52.157F2	6	AN	1	21	22	7	5	6
45503	H100_DRIL52.157F2_73	Chile16_69_5	18	248	446	H100_DRIL52.157F2	6	AN	1	21	23	7	4	5.5
45504	H100_DRIL52.157F2_37	Chile16_70_6	18	249	410	H100_DRIL52.157F2	6	AN	1	21	24	7	4	5.5
45505	H100_DRIL52.157F2_86	Chile16_68_1	18	250	459	H100_DRIL52.157F2	6	AN	1	22	24	7	4	5.5
45506	H100_DRIL52.157F2_74	Chile16_69_6	18	251	447	H100_DRIL52.157F2	6	AN	1	22	23	7	4	5.5
45507	H100_DRIL52.157F2_82	Chile16_69_14	18	252	455	H100_DRIL52.157F2	6	AN	1	22	22	7	4	5.5
45508	H100	'	18	253	970	H100	6	AN	1	22	21	7	3.5	5.25
45509	H100_DRIL52.157F2_45	Chile16_70_14	19	254	418	H100_DRIL52.157F2	6	AN	1	22	20	7	5.5	6.25
45510	H100_DRIL52.157F2_89	Chile16_68_4	19	255	462	H100_DRIL52.157F2	6	AN	1	22	19	7	5	6
45511	H100_DRIL52.157F2_68	Chile16_66_18	19	256	441	H100_DRIL52.157F2	6	AN	1	22	18	7	4.5	5.75
45512	H100_DRIL52.157F2_48	Chile16_70_17	19	257	421	H100_DRIL52.157F2	6	AN	1	22	17	7	5	6
45513	H100_DRIL52.157F2_90	Chile16_68_5	19	258	463	H100_DRIL52.157F2	6	AN	1	22	16	7	4	5.5
45514	H100_DRIL52.157F2_79	Chile16_69_11	19	259	452	H100_DRIL52.157F2	6	AN	1	22	15	7	4	5.5
45518	H100_DRIL52.157F2_93	Chile16_68_8	19	263	466	H100_DRIL52.157F2	6	AN	1	22	11	7.5	4	5.75
45519	H100_DRIL52.157F2_56	Chile16_66_6	19	264	429	H100_DRIL52.157F2	6	AN	1	22	10	7	4	5.5
45520	H100_DRIL52.157F2_6	Chile16_65_6	19	265	379	H100_DRIL52.157F2	6	AN	1	22	9	7.5	5.5	6.5
45521	H100_DRIL52.157F2_24	Chile16_67_8	19	266	397	H100_DRIL52.157F2	6	AN	1	22	8	7	5	6
45522	H100	'	20	267	970	H100	6	AN	1	22	7	7	3	5
45523	H100_DRIL52.157F2_18	Chile16_67_2	20	268	391	H100_DRIL52.157F2	6	AN	1	22	6	7	5.5	6.25
45524	H100_DRIL52.157F2_4	Chile16_65_4	20	269	377	H100_DRIL52.157F2	6	AN	1	22	5	7	3	5
45525	H100_DRIL52.157F2_71	Chile16_69_3	20	270	444	H100_DRIL52.157F2	6	AN	1	22	4	7.5	4	5.75
45526	H100_DRIL52.157F2_64	Chile16_66_14	20	271	437	H100_DRIL52.157F2	6	AN	1	22	3	7	3	5
45527	H100_DRIL52.157F2_95	Chile16_68_10	20	272	468	H100_DRIL52.157F2	6	AN	1	22	2	7	3.5	5.25
45528	H100_DRIL52.157F2_54	Chile16_66_4	20	273	427	H100_DRIL52.157F2	6	AN	1	22	1	7.5	4	5.75
45529	H100_DRIL52.157F2_12	Chile16_65_12	20	274	385	H100_DRIL52.157F2	6	AN	1	23	1	7	4	5.5
45530	H100_DRIL52.157F2_28	Chile16_67_12	20	275	401	H100_DRIL52.157F2	6	AN	1	23	2	7	3.5	5.25
45532	H100_DRIL52.157F2_25	Chile16_67_9	20	277	398	H100_DRIL52.157F2	6	AN	1	23	4	7.5	5	6.25
45533	H100_DRIL52.157F2_29	Chile16_67_13	20	278	402	H100_DRIL52.157F2	6	AN	1	23	5	7	3	5
45534	H100_DRIL52.157F2_76	Chile16_69_8	20	279	449	H100_DRIL52.157F2	6	AN	1	23	6	7	4	5.5
45535	H100_DRIL52.157F2_94	Chile16_68_9	20	280	467	H100_DRIL52.157F2	6	AN	1	23	7	7	4	5.5
45536	H100_DRIL52.157F2_38	Chile16_70_7	20	281	411	H100_DRIL52.157F2	6	AN	1	23	8	7	4.5	5.75
45537	H100_DRIL52.157F2_30	Chile16_67_14	21	282	403	H100_DRIL52.157F2	6	AN	1	23	9	7	4.5	5.75
45538	H100_DRIL52.157F2_47	Chile16_70_16	21	283	420	H100_DRIL52.157F2	6	AN	1	23	10	7.5	6	6.75
45539	H100_DRIL52.157F2_13	Chile16_65_13	21	284	386	H100_DRIL52.157F2	6	AN	1	23	11	7	5.5	6.25
45540	H100_DRIL52.157F2_85	Chile16_69_17	21	285	458	H100_DRIL52.157F2	6	AN	1	23	12	.	4	4
45542	H100_DRIL52.157F2_11	Chile16_65_11	21	287	384	H100_DRIL52.157F2	6	AN	1	23	14	.	5.5	5.5
45543	H100_DRIL52.157F2_67	Chile16_66_17	21	288	440	H100_DRIL52.157F2	6	AN	1	23	15	.	4	4
45544	H100_DRIL52.157F2_40	Chile16_70_9	21	289	413	H100_DRIL52.157F2	6	AN	1	23	16	8	6	7
45545	H100_DRIL52.157F2_66	Chile16_66_16	21	290	439	H100_DRIL52.157F2	6	AN	1	23	17	7	4.5	5.75
45546	H100_DRIL52.157F2_46	Chile16_70_15	21	291	419	H100_DRIL52.157F2	6	AN	1	23	18	7	4	5.5
45547	H100	'	21	292	970	H100	6	AN	1	23	19	7	4	5.5
45548	H100_DRIL52.157F2_99	Chile16_68_14	21	293	472	H100_DRIL52.157F2	6	AN	1	23	20	7.5	6.5	7
45549	H100_DRIL52.157F2_58	Chile16_66_8	21	294	431	H100_DRIL52.157F2	6	AN	1	23	21	7	4.5	5.75
45550	H100_DRIL52.157F2_75	Chile16_69_7	21	295	448	H100_DRIL52.157F2	6	AN	1	23	22	7	4	5.5
45551	H100_DRIL52.157F2_1	Chile16_65_1	21	296	374	H100_DRIL52.157F2	6	AN	1	23	23	7	4	5.5
45553	H100_DRIL52.157F2_15	Chile16_65_15	22	297	388	H100_DRIL52.157F2	6	AN	1	24	24	7.5	5	6.25
45554	H100_DRIL52.157F2_51	Chile16_66_1	22	298	424	H100_DRIL52.157F2	6	AN	1	24	23	7	5.5	6.25
45555	H100_DRIL52.157F2_16	Chile16_65_16	22	299	389	H100_DRIL52.157F2	6	AN	1	24	22	.	4	4
45556	H100_DRIL52.157F2_98	Chile16_68_13	22	300	471	H100_DRIL52.157F2	6	AN	1	24	21	7.5	4	5.75
45557	H100_DRIL32.134F2_3	Chile16_35_3	22	301	159	H100_DRIL32.134F2	3	AN	1	24	20	7	4	5.5
45558	H100_DRIL32.134F2_19	Chile16_36_4	22	302	175	H100_DRIL32.134F2	3	AN	1	24	19	7.5	5	6.25
45559	H100_DRIL32.134F2_13	Chile16_35_13	22	303	169	H100_DRIL32.134F2	3	AN	1	24	18	7	4	5.5
45560	H100_DRIL32.134F2_53	Chile16_37_6	22	304	209	H100_DRIL32.134F2	3	AN	1	24	17	7.5	4.5	6
45561	H100	'	22	305	970	H100	3	AN	1	24	16	7.5	4.5	6
45562	H100_DRIL32.134F2_39	Chile16_38_2	22	306	195	H100_DRIL32.134F2	3	AN	1	24	15	7.5	4	5.75
45563	H100_DRIL32.134F2_29	Chile16_39_8	22	307	185	H100_DRIL32.134F2	3	AN	1	24	14	7	3	5
45564	H100_DRIL32.134F2_47	Chile16_38_10	22	308	203	H100_DRIL32.134F2	3	AN	1	24	13	7	3	5
45566	H100_DRIL32.134F2_42	Chile16_38_5	22	310	198	H100_DRIL32.134F2	3	AN	1	24	11	7.5	5	6.25
45567	H100_DRIL32.134F2_50	Chile16_37_3	22	311	206	H100_DRIL32.134F2	3	AN	1	24	10	7	4	5.5
45568	H100_DRIL32.134F2_34	Chile16_40_5	22	312	190	H100_DRIL32.134F2	3	AN	1	24	9	7.5	4	5.75
45569	H100_DRIL32.134F2_27	Chile16_39_6	22	313	183	H100_DRIL32.134F2	3	AN	1	24	8	7	4	5.5
45570	H100_DRIL32.134F2_16	Chile16_36_1	23	314	172	H100_DRIL32.134F2	3	AN	1	24	7	7	4	5.5
45571	H100_DRIL32.134F2_54	Chile16_37_7	23	315	210	H100_DRIL32.134F2	3	AN	1	24	6	7	4	5.5
45572	H100_DRIL32.134F2_48	Chile16_37_1	23	316	204	H100_DRIL32.134F2	3	AN	1	24	5	7	4	5.5
45573	H100_DRIL32.134F2_28	Chile16_39_7	23	317	184	H100_DRIL32.134F2	3	AN	1	24	4	.	2.5	2.5
45574	DRIL32.134	'	23	318	959	DRIL32.134	3	AN	1	24	3	7	5	6
45578	H100_DRIL32.134F2_49	Chile16_37_2	23	322	205	H100_DRIL32.134F2	3	AN	1	25	2	.	4	4
45580	H100_DRIL32.134F2_43	Chile16_38_6	23	324	199	H100_DRIL32.134F2	3	AN	1	25	4	7	3	5
45581	H100	'	23	325	970	H100	3	AN	1	25	5	6.5	3	4.75
45582	H100_DRIL32.134F2_41	Chile16_38_4	23	326	197	H100_DRIL32.134F2	3	AN	1	25	6	7	3	5
45583	H100_DRIL32.134F2_15	Chile16_35_15	23	327	171	H100_DRIL32.134F2	3	AN	1	25	7	7.5	5	6.25
45584	H100_DRIL32.134F2_62	Chile16_37_15	23	328	218	H100_DRIL32.134F2	3	AN	1	25	8	7	3	5
45585	H100_DRIL32.134F2_4	Chile16_35_4	24	329	160	H100_DRIL32.134F2	3	AN	1	25	9	7	3	5
45586	H100_DRIL32.134F2_25	Chile16_39_4	24	330	181	H100_DRIL32.134F2	3	AN	1	25	10	7	4.5	5.75
45587	H100_DRIL32.134F2_60	Chile16_37_13	24	331	216	H100_DRIL32.134F2	3	AN	1	25	11	7.5	4	5.75
45588	H100_DRIL32.134F2_58	Chile16_37_11	24	332	214	H100_DRIL32.134F2	3	AN	1	25	12	.	3	3
45589	H100_DRIL32.134F2_7	Chile16_35_7	24	333	163	H100_DRIL32.134F2	3	AN	1	25	13	7.5	4	5.75
45591	H100_DRIL32.134F2_20	Chile16_36_5	24	335	176	H100_DRIL32.134F2	3	AN	1	25	15	8	7.5	7.75
45592	H100_DRIL32.134F2_31	Chile16_40_2	24	336	187	H100_DRIL32.134F2	3	AN	1	25	16	7.5	4	5.75
45593	H100_DRIL32.134F2_46	Chile16_38_9	24	337	202	H100_DRIL32.134F2	3	AN	1	25	17	7.5	4	5.75
45594	H100_DRIL32.134F2_1	Chile16_35_1	24	338	157	H100_DRIL32.134F2	3	AN	1	25	18	7	3	5
45595	H100_DRIL32.134F2_51	Chile16_37_4	24	339	207	H100_DRIL32.134F2	3	AN	1	25	19	7	4	5.5
45596	H100_DRIL32.134F2_55	Chile16_37_8	24	340	211	H100_DRIL32.134F2	3	AN	1	25	20	7.5	4.5	6
45597	H100_DRIL32.134F2_33	Chile16_40_4	24	341	189	H100_DRIL32.134F2	3	AN	1	25	21	7	3	5
45599	H100_DRIL32.134F2_32	Chile16_40_3	24	343	188	H100_DRIL32.134F2	3	AN	1	25	23	7	5	6
45600	H100_DRIL32.134F2_45	Chile16_38_8	25	344	201	H100_DRIL32.134F2	3	AN	1	25	24	7	5	6
45601	H100_DRIL32.134F2_2	Chile16_35_2	25	345	158	H100_DRIL32.134F2	3	AN	1	26	24	7.5	5	6.25
45602	H100_DRIL32.134F2_56	Chile16_37_9	25	346	212	H100_DRIL32.134F2	3	AN	1	26	23	7	4	5.5
45603	H100_DRIL32.134F2_14	Chile16_35_14	25	347	170	H100_DRIL32.134F2	3	AN	1	26	22	7.5	5	6.25
45604	H100_DRIL32.134F2_24	Chile16_39_3	25	348	180	H100_DRIL32.134F2	3	AN	1	26	21	7.5	6	6.75
45605	H100_DRIL32.134F2_36	Chile16_40_7	25	349	192	H100_DRIL32.134F2	3	AN	1	26	20	7.5	5.5	6.5
45608	H100_DRIL62.030F2_9	Chile16_79_9	25	352	560	H100_DRIL62.030F2	8	AN	1	26	17	7	5	6
45610	H100_DRIL62.030F2_28	Chile16_77_10	25	354	579	H100_DRIL62.030F2	8	AN	1	26	15	7.5	5.5	6.5
45611	H100_DRIL62.030F2_46	Chile16_80_5	25	355	597	H100_DRIL62.030F2	8	AN	1	26	14	.	5.5	5.5
45612	H100_DRIL62.030F2_12	Chile16_79_12	25	356	563	H100_DRIL62.030F2	8	AN	1	26	13	.	5.5	5.5
45613	H100_DRIL62.030F2_10	Chile16_79_10	25	357	561	H100_DRIL62.030F2	8	AN	1	26	12	.	5.5	5.5
45614	H100_DRIL62.030F2_23	Chile16_77_5	26	358	574	H100_DRIL62.030F2	8	AN	1	26	11	7.5	5	6.25
45616	H100	'	26	360	970	H100	8	AN	1	26	9	7	4	5.5
45617	H100_DRIL62.030F2_19	Chile16_77_1	26	361	570	H100_DRIL62.030F2	8	AN	1	26	8	7.5	4	5.75
45619	H100_DRIL62.030F2_15	Chile16_78_2	26	363	566	H100_DRIL62.030F2	8	AN	1	26	6	7	4	5.5
45621	H100_DRIL62.030F2_48	Chile16_80_7	26	365	599	H100_DRIL62.030F2	8	AN	1	26	4	7	4.5	5.75
45625	H100_DRIL62.030F2_3	Chile16_79_3	26	369	554	H100_DRIL62.030F2	8	AN	1	27	1	7.5	5	6.25
45627	H100_DRIL62.030F2_7	Chile16_79_7	26	371	558	H100_DRIL62.030F2	8	AN	1	27	3	.	4	4
45628	H100_DRIL62.030F2_5	Chile16_79_5	27	372	556	H100_DRIL62.030F2	8	AN	1	27	4	7	5.5	6.25
45631	H100_DRIL62.030F2_45	Chile16_80_4	27	375	596	H100_DRIL62.030F2	8	AN	1	27	7	7.5	6.5	7
45632	H100_DRIL62.030F2_49	Chile16_80_8	27	376	600	H100_DRIL62.030F2	8	AN	1	27	8	7.5	6	6.75
45633	H100_DRIL62.030F2_21	Chile16_77_3	27	377	572	H100_DRIL62.030F2	8	AN	1	27	9	.	4.5	4.5
45634	H100_DRIL62.030F2_20	Chile16_77_2	27	378	571	H100_DRIL62.030F2	8	AN	1	27	10	7	6	6.5
45635	H100_DRIL62.030F2_8	Chile16_79_8	27	379	559	H100_DRIL62.030F2	8	AN	1	27	11	7.5	6	6.75
45636	H100_DRIL62.030F2_27	Chile16_77_9	27	380	578	H100_DRIL62.030F2	8	AN	1	27	12	7.5	5.5	6.5
45642	H100_DRIL52.268F2_41	Chile16_73_1	28	386	515	H100_DRIL52.268F2	7	AN	1	27	18	7	5.5	6.25
45643	H100_DRIL52.268F2_2	Chile16_75_2	28	387	476	H100_DRIL52.268F2	7	AN	1	27	19	7.5	6.5	7
45644	H100_DRIL52.268F2_31	Chile16_76_8	28	388	505	H100_DRIL52.268F2	7	AN	1	27	20	7	5.5	6.25
45645	H100_DRIL52.268F2_62	Chile16_71_6	28	389	536	H100_DRIL52.268F2	7	AN	1	27	21	.	6	6
45646	H100_DRIL52.268F2_60	Chile16_71_4	28	390	534	H100_DRIL52.268F2	7	AN	1	27	22	7	5.5	6.25
45647	H100_DRIL52.268F2_34	Chile16_76_11	28	391	508	H100_DRIL52.268F2	7	AN	1	27	23	7	5	6
45648	H100_DRIL52.268F2_10	Chile16_75_10	28	392	484	H100_DRIL52.268F2	7	AN	1	27	24	7	6	6.5
45649	H100_DRIL52.268F2_55	Chile16_73_15	28	393	529	H100_DRIL52.268F2	7	AN	1	28	24	7	5	6
45650	H100	'	28	394	970	H100	7	AN	1	28	23	7	3.5	5.25
45651	H100_DRIL52.268F2_51	Chile16_73_11	28	395	525	H100_DRIL52.268F2	7	AN	1	28	22	7	4.5	5.75
45652	H100_DRIL52.268F2_74	Chile16_72_6	28	396	548	H100_DRIL52.268F2	7	AN	1	28	21	.	5.5	5.5
45653	H100_DRIL52.268F2_26	Chile16_76_3	28	397	500	H100_DRIL52.268F2	7	AN	1	28	20	7	5	6
45654	H100_DRIL52.268F2_52	Chile16_73_12	28	398	526	H100_DRIL52.268F2	7	AN	1	28	19	7.5	6	6.75
45655	H100_DRIL52.268F2_5	Chile16_75_5	28	399	479	H100_DRIL52.268F2	7	AN	1	28	18	7.5	5.5	6.5
45657	H100	'	29	400	970	H100	7	AN	1	28	16	7	4	5.5
45658	H100_DRIL52.268F2_73	Chile16_72_5	29	401	547	H100_DRIL52.268F2	7	AN	1	28	15	7.5	4	5.75
45659	H100_DRIL52.268F2_36	Chile16_76_13	29	402	510	H100_DRIL52.268F2	7	AN	1	28	14	.	5.5	5.5
45660	H100_DRIL52.268F2_13	Chile16_74_3	29	403	487	H100_DRIL52.268F2	7	AN	1	28	13	7.5	6	6.75
45661	H100_DRIL52.268F2_19	Chile16_74_9	29	404	493	H100_DRIL52.268F2	7	AN	1	28	12	7	6.5	6.75
45662	H100_DRIL52.268F2_48	Chile16_73_8	29	405	522	H100_DRIL52.268F2	7	AN	1	28	11	7.5	6	6.75
45663	H100_DRIL52.268F2_7	Chile16_75_7	29	406	481	H100_DRIL52.268F2	7	AN	1	28	10	7.5	6	6.75
45665	H100_DRIL52.268F2_45	Chile16_73_5	29	408	519	H100_DRIL52.268F2	7	AN	1	28	8	.	6	6
45666	H100_DRIL52.268F2_25	Chile16_76_2	29	409	499	H100_DRIL52.268F2	7	AN	1	28	7	7.5	7	7.25
45667	H100_DRIL52.268F2_69	Chile16_72_1	29	410	543	H100_DRIL52.268F2	7	AN	1	28	6	7	6	6.5
45668	H100_DRIL52.268F2_24	Chile16_76_1	29	411	498	H100_DRIL52.268F2	7	AN	1	28	5	7	5	6
45669	H100_DRIL52.268F2_20	Chile16_74_10	29	412	494	H100_DRIL52.268F2	7	AN	1	28	4	.	4.5	4.5
45670	H100_DRIL52.268F2_43	Chile16_73_3	29	413	517	H100_DRIL52.268F2	7	AN	1	28	3	7	5	6
45671	H100	'	29	414	970	H100	7	AN	1	28	2	6	3.5	4.75
45672	H100_DRIL52.268F2_59	Chile16_71_3	29	415	533	H100_DRIL52.268F2	7	AN	1	28	1	7	5.5	6.25
45673	H100_DRIL52.268F2_72	Chile16_72_4	30	416	546	H100_DRIL52.268F2	7	AN	1	29	1	6.5	4.5	5.5
45674	H100_DRIL52.268F2_42	Chile16_73_2	30	417	516	H100_DRIL52.268F2	7	AN	1	29	2	7	5	6
45675	H100_DRIL52.268F2_21	Chile16_74_11	30	418	495	H100_DRIL52.268F2	7	AN	1	29	3	7	5.5	6.25
45676	H100_DRIL52.268F2_65	Chile16_71_9	30	419	539	H100_DRIL52.268F2	7	AN	1	29	4	7	5.5	6.25
45677	H100_DRIL52.268F2_15	Chile16_74_5	30	420	489	H100_DRIL52.268F2	7	AN	1	29	5	.	5.5	5.5
45678	H100_DRIL52.268F2_56	Chile16_73_16	30	421	530	H100_DRIL52.268F2	7	AN	1	29	6	7	5	6
45679	H100_DRIL52.268F2_18	Chile16_74_8	30	422	492	H100_DRIL52.268F2	7	AN	1	29	7	7	5.5	6.25
45680	H100_DRIL52.268F2_27	Chile16_76_4	30	423	501	H100_DRIL52.268F2	7	AN	1	29	8	7	7	7
45681	H100_DRIL52.268F2_11	Chile16_74_1	30	424	485	H100_DRIL52.268F2	7	AN	1	29	9	7	6	6.5
45682	H100_DRIL52.268F2_44	Chile16_73_4	30	425	518	H100_DRIL52.268F2	7	AN	1	29	10	7	5.5	6.25
45683	H100	'	30	426	970	H100	7	AN	1	29	11	7	4	5.5
45684	H100_DRIL52.268F2_76	Chile16_72_8	30	427	550	H100_DRIL52.268F2	7	AN	1	29	12	.	4	4
45685	H100_DRIL52.268F2_37	Chile16_76_14	30	428	511	H100_DRIL52.268F2	7	AN	1	29	13	7	6	6.5
45686	H100_DRIL52.268F2_39	Chile16_76_16	30	429	513	H100_DRIL52.268F2	7	AN	1	29	14	7.5	5.5	6.5
45687	H100_DRIL52.268F2_16	Chile16_74_6	30	430	490	H100_DRIL52.268F2	7	AN	1	29	15	7	6.5	6.75
45688	H100_DRIL52.268F2_77	Chile16_72_9	30	431	551	H100_DRIL52.268F2	7	AN	1	29	16	.	4	4
45689	H100_DRIL52.268F2_17	Chile16_74_7	31	432	491	H100_DRIL52.268F2	7	AN	1	29	17	7	5.5	6.25
45690	H100_DRIL52.268F2_3	Chile16_75_3	31	433	477	H100_DRIL52.268F2	7	AN	1	29	18	7	6	6.5
45691	H100_DRIL52.268F2_28	Chile16_76_5	31	434	502	H100_DRIL52.268F2	7	AN	1	29	19	7.5	5.5	6.5
45692	H100_DRIL52.268F2_75	Chile16_72_7	31	435	549	H100_DRIL52.268F2	7	AN	1	29	20	7	5.5	6.25
45693	H100_DRIL52.268F2_29	Chile16_76_6	31	436	503	H100_DRIL52.268F2	7	AN	1	29	21	7	6	6.5
45694	H100_DRIL52.268F2_35	Chile16_76_12	31	437	509	H100_DRIL52.268F2	7	AN	1	29	22	7	6	6.5
45695	H100_DRIL52.268F2_64	Chile16_71_8	31	438	538	H100_DRIL52.268F2	7	AN	1	29	23	7	5.5	6.25
45696	H100_DRIL52.268F2_23	Chile16_74_13	31	439	497	H100_DRIL52.268F2	7	AN	1	29	24	7	5.5	6.25
45697	DRIL52.268	'	31	440	963	DRIL52.268	7	AN	1	30	24	7.5	7	7.25
45698	H100_DRIL52.268F2_58	Chile16_71_2	31	441	532	H100_DRIL52.268F2	7	AN	1	30	23	7	6	6.5
45699	H100_DRIL52.268F2_47	Chile16_73_7	31	442	521	H100_DRIL52.268F2	7	AN	1	30	22	7	5	6
45700	H100	'	31	443	970	H100	7	AN	1	30	21	7	5.5	6.25
45701	H100_DRIL52.268F2_33	Chile16_76_10	31	444	507	H100_DRIL52.268F2	7	AN	1	30	20	7	5.5	6.25
45702	H100_DRIL52.268F2_53	Chile16_73_13	31	445	527	H100_DRIL52.268F2	7	AN	1	30	19	7	5.5	6.25
45703	H100_DRIL52.268F2_61	Chile16_71_5	31	446	535	H100_DRIL52.268F2	7	AN	1	30	18	7	5.5	6.25
45705	H100	'	32	448	970	H100	11	AN	1	30	16	7	4.5	5.75
45706	H100_DRIL72.040F2_15	Chile16_128_8	32	449	765	H100_DRIL72.040F2	11	AN	1	30	15	7.5	5.5	6.5
45707	H100_DRIL72.040F2_21	Chile16_129_5	32	450	771	H100_DRIL72.040F2	11	AN	1	30	14	.	5	5
45708	H100_DRIL72.040F2_6	Chile16_125_6	32	451	756	H100_DRIL72.040F2	11	AN	1	30	13	7.5	5.5	6.5
45709	H100_DRIL72.040F2_27	Chile16_129_11	32	452	777	H100_DRIL72.040F2	11	AN	1	30	12	7	6	6.5
45710	H100_DRIL72.040F2_42	Chile16_127_2	32	453	792	H100_DRIL72.040F2	11	AN	1	30	11	7.5	6	6.75
45711	H100_DRIL72.040F2_31	Chile16_126_1	32	454	781	H100_DRIL72.040F2	11	AN	1	30	10	7	6	6.5
45712	H100_DRIL72.040F2_19	Chile16_129_3	32	455	769	H100_DRIL72.040F2	11	AN	1	30	9	7	5.5	6.25
45713	H100_DRIL72.040F2_50	Chile16_127_10	32	456	800	H100_DRIL72.040F2	11	AN	1	30	8	7.5	5	6.25
45714	H100_DRIL72.040F2_17	Chile16_129_1	32	457	767	H100_DRIL72.040F2	11	AN	1	30	7	7.5	6	6.75
45715	H100_DRIL72.040F2_47	Chile16_127_7	32	458	797	H100_DRIL72.040F2	11	AN	1	30	6	7	6	6.5
45716	H100_DRIL72.040F2_32	Chile16_126_2	32	459	782	H100_DRIL72.040F2	11	AN	1	30	5	7	6	6.5
45717	H100_DRIL72.040F2_53	Chile16_124_1	33	460	803	H100_DRIL72.040F2	11	AN	1	30	4	7	6	6.5
45718	H100_DRIL72.040F2_18	Chile16_129_2	33	461	768	H100_DRIL72.040F2	11	AN	1	30	3	7	6	6.5
45720	H100_DRIL72.040F2_2	Chile16_125_2	33	463	752	H100_DRIL72.040F2	11	AN	1	30	1	7	5	6
45721	H100_DRIL72.040F2_10	Chile16_128_3	33	464	760	H100_DRIL72.040F2	11	AN	1	31	1	7	5	6
45723	H100	'	33	466	970	H100	11	AN	1	31	3	6.5	4.5	5.5
45724	H100_DRIL72.040F2_56	Chile16_124_4	33	467	806	H100_DRIL72.040F2	11	AN	1	31	4	7	5	6
45725	H100_DRIL72.040F2_8	Chile16_128_1	33	468	758	H100_DRIL72.040F2	11	AN	1	31	5	7	4	5.5
45726	H100_DRIL72.040F2_16	Chile16_128_9	33	469	766	H100_DRIL72.040F2	11	AN	1	31	6	7	4.5	5.75
45727	H100_DRIL72.040F2_28	Chile16_129_12	33	470	778	H100_DRIL72.040F2	11	AN	1	31	7	7	4.5	5.75
45728	H100_DRIL72.040F2_52	Chile16_127_12	33	471	802	H100_DRIL72.040F2	11	AN	1	31	8	.	3	3
45729	H100_DRIL72.040F2_57	Chile16_124_5	33	472	807	H100_DRIL72.040F2	11	AN	1	31	9	7	5.5	6.25
45730	H100_DRIL72.040F2_59	Chile16_124_7	33	473	809	H100_DRIL72.040F2	11	AN	1	31	10	7	6	6.5
45731	DRIL72.040	'	33	474	967	DRIL72.040	11	AN	1	31	11	7	6.5	6.75
45732	H100_DRIL72.040F2_55	Chile16_124_3	33	475	805	H100_DRIL72.040F2	11	AN	1	31	12	7	6	6.5
45733	H100_DRIL72.040F2_43	Chile16_127_3	33	476	793	H100_DRIL72.040F2	11	AN	1	31	13	7	5.5	6.25
45734	H100_DRIL72.040F2_1	Chile16_125_1	34	477	751	H100_DRIL72.040F2	11	AN	1	31	14	7	4	5.5
45735	H100_DRIL72.040F2_7	Chile16_125_7	34	478	757	H100_DRIL72.040F2	11	AN	1	31	15	7	4.5	5.75
45736	H100_DRIL72.040F2_44	Chile16_127_4	34	479	794	H100_DRIL72.040F2	11	AN	1	31	16	.	5.5	5.5
45737	H100_DRIL72.040F2_60	Chile16_124_8	34	480	810	H100_DRIL72.040F2	11	AN	1	31	17	7.5	6.5	7
45738	H100_DRIL72.040F2_58	Chile16_124_6	34	481	808	H100_DRIL72.040F2	11	AN	1	31	18	7.5	5	6.25
45739	H100_DRIL72.040F2_14	Chile16_128_7	34	482	764	H100_DRIL72.040F2	11	AN	1	31	19	7	6	6.5
45740	H100_DRIL72.040F2_4	Chile16_125_4	34	483	754	H100_DRIL72.040F2	11	AN	1	31	20	7	5.5	6.25
45742	H100_DRIL72.040F2_24	Chile16_129_8	34	485	774	H100_DRIL72.040F2	11	AN	1	31	22	7	4	5.5
45743	H100_DRIL72.040F2_13	Chile16_128_6	34	486	763	H100_DRIL72.040F2	11	AN	1	31	23	6.5	4	5.25
45744	H100_DRIL72.040F2_26	Chile16_129_10	34	487	776	H100_DRIL72.040F2	11	AN	1	31	24	7	5.5	6.25
45745	H100_DRIL72.040F2_46	Chile16_127_6	34	488	796	H100_DRIL72.040F2	11	AN	1	32	24	7	5.5	6.25
45746	H100_DRIL72.040F2_40	Chile16_126_10	34	489	790	H100_DRIL72.040F2	11	AN	1	32	23	7	4.5	5.75
45747	H100_DRIL72.040F2_9	Chile16_128_2	34	490	759	H100_DRIL72.040F2	11	AN	1	32	22	7	5.5	6.25
45748	H100_DRIL72.040F2_25	Chile16_129_9	35	491	775	H100_DRIL72.040F2	11	AN	1	32	21	7	6	6.5
45749	H100_DRIL72.040F2_34	Chile16_126_4	35	492	784	H100_DRIL72.040F2	11	AN	1	32	20	7	5	6
45750	H100_DRIL72.040F2_45	Chile16_127_5	35	493	795	H100_DRIL72.040F2	11	AN	1	32	19	7	5.5	6.25
45751	H100_DRIL72.040F2_23	Chile16_129_7	35	494	773	H100_DRIL72.040F2	11	AN	1	32	18	7	5.5	6.25
45752	H100	'	35	495	970	H100	5	AN	1	32	17	7	4.5	5.75
45753	H100_DRIL52.055F2_15	Chile16_56_8	35	496	320	H100_DRIL52.055F2	5	AN	1	32	16	7.5	6	6.75
45754	H100_DRIL52.055F2_46	Chile16_57_4	35	497	351	H100_DRIL52.055F2	5	AN	1	32	15	.	5.5	5.5
45755	H100_DRIL52.055F2_7	Chile16_53_7	35	498	312	H100_DRIL52.055F2	5	AN	1	32	14	.	5.5	5.5
45756	H100_DRIL52.055F2_8	Chile16_56_1	35	499	313	H100_DRIL52.055F2	5	AN	1	32	13	.	5.5	5.5
45757	H100_DRIL52.055F2_21	Chile16_56_14	35	500	326	H100_DRIL52.055F2	5	AN	1	32	12	7.5	5.5	6.5
45758	H100_DRIL52.055F2_63	Chile16_55_2	35	501	368	H100_DRIL52.055F2	5	AN	1	32	11	7.5	6.5	7
45759	H100_DRIL52.055F2_57	Chile16_57_15	35	502	362	H100_DRIL52.055F2	5	AN	1	32	10	7.5	6.5	7
45761	H100_DRIL52.055F2_39	Chile16_54_5	36	503	344	H100_DRIL52.055F2	5	AN	1	32	8	7	6	6.5
45762	H100_DRIL52.055F2_25	Chile16_58_4	36	504	330	H100_DRIL52.055F2	5	AN	1	32	7	7.5	6.5	7
45763	H100_DRIL52.055F2_64	Chile16_55_3	36	505	369	H100_DRIL52.055F2	5	AN	1	32	6	.	4	4
45764	H100_DRIL52.055F2_5	Chile16_53_5	36	506	310	H100_DRIL52.055F2	5	AN	1	32	5	7	6	6.5
45765	H100_DRIL52.055F2_49	Chile16_57_7	36	507	354	H100_DRIL52.055F2	5	AN	1	32	4	7	5.5	6.25
45766	H100_DRIL52.055F2_13	Chile16_56_6	36	508	318	H100_DRIL52.055F2	5	AN	1	32	3	7	5.5	6.25
45767	H100_DRIL52.055F2_47	Chile16_57_5	36	509	352	H100_DRIL52.055F2	5	AN	1	32	2	7.5	6	6.75
45768	H100_DRIL52.055F2_23	Chile16_58_2	36	510	328	H100_DRIL52.055F2	5	AN	1	32	1	7	5	6
45770	H100	'	36	512	970	H100	5	AN	1	33	2	7	4	5.5
45771	H100_DRIL52.055F2_14	Chile16_56_7	36	513	319	H100_DRIL52.055F2	5	AN	1	33	3	7.5	6	6.75
45772	H100_DRIL52.055F2_40	Chile16_54_6	36	514	345	H100_DRIL52.055F2	5	AN	1	33	4	7	4.5	5.75
45773	H100_DRIL52.055F2_20	Chile16_56_13	37	515	325	H100_DRIL52.055F2	5	AN	1	33	5	7	6	6.5
45774	H100_DRIL52.055F2_55	Chile16_57_13	37	516	360	H100_DRIL52.055F2	5	AN	1	33	6	7.5	5.5	6.5
45775	H100_DRIL52.055F2_62	Chile16_55_1	37	517	367	H100_DRIL52.055F2	5	AN	1	33	7	7.5	6	6.75
45776	H100_DRIL52.055F2_12	Chile16_56_5	37	518	317	H100_DRIL52.055F2	5	AN	1	33	8	.	6	6
45777	H100	'	37	519	970	H100	5	AN	1	33	9	7	4	5.5
45778	H100_DRIL52.055F2_68	Chile16_55_7	37	520	373	H100_DRIL52.055F2	5	AN	1	33	10	7.5	7	7.25
45779	H100_DRIL52.055F2_41	Chile16_54_7	37	521	346	H100_DRIL52.055F2	5	AN	1	33	11	7	6	6.5
45781	H100_DRIL52.055F2_36	Chile16_54_2	37	523	341	H100_DRIL52.055F2	5	AN	1	33	13	7	5	6
45782	H100_DRIL52.055F2_31	Chile16_58_10	37	524	336	H100_DRIL52.055F2	5	AN	1	33	14	7.5	5	6.25
45783	H100_DRIL52.055F2_32	Chile16_58_11	37	525	337	H100_DRIL52.055F2	5	AN	1	33	15	7	6	6.5
45784	H100_DRIL52.055F2_66	Chile16_55_5	37	526	371	H100_DRIL52.055F2	5	AN	1	33	16	7.5	7	7.25
45785	H100_DRIL52.055F2_54	Chile16_57_12	37	527	359	H100_DRIL52.055F2	5	AN	1	33	17	7	6	6.5
45786	H100_DRIL52.055F2_1	Chile16_53_1	37	528	306	H100_DRIL52.055F2	5	AN	1	33	18	7	6	6.5
45787	H100_DRIL52.055F2_59	Chile16_57_17	37	529	364	H100_DRIL52.055F2	5	AN	1	33	19	7.5	6	6.75
45788	H100_DRIL52.055F2_48	Chile16_57_6	37	530	353	H100_DRIL52.055F2	5	AN	1	33	20	.	6	6
45789	H100_DRIL52.055F2_10	Chile16_56_3	37	531	315	H100_DRIL52.055F2	5	AN	1	33	21	7	5	6
45790	H100_DRIL52.055F2_34	Chile16_58_13	37	532	339	H100_DRIL52.055F2	5	AN	1	33	22	7.5	7	7.25
45791	H100_DRIL52.055F2_42	Chile16_54_8	37	533	347	H100_DRIL52.055F2	5	AN	1	33	23	7.5	6.5	7
45792	H100_DRIL52.055F2_4	Chile16_53_4	38	534	309	H100_DRIL52.055F2	5	AN	1	33	24	7	5	6
45793	H100_DRIL52.055F2_28	Chile16_58_7	38	535	333	H100_DRIL52.055F2	5	AN	1	34	24	7.5	6.5	7
45794	H100_DRIL52.055F2_9	Chile16_56_2	38	536	314	H100_DRIL52.055F2	5	AN	1	34	23	7.5	5.5	6.5
45795	H100_DRIL52.055F2_65	Chile16_55_4	38	537	370	H100_DRIL52.055F2	5	AN	1	34	22	7.5	6	6.75
45796	H100_DRIL52.055F2_61	Chile16_57_19	38	538	366	H100_DRIL52.055F2	5	AN	1	34	21	7	6.5	6.75
45797	DRIL52.055	'	38	539	961	DRIL52.055	5	AN	1	34	20	7.5	6.5	7
45798	H100_DRIL52.055F2_44	Chile16_57_2	38	540	349	H100_DRIL52.055F2	5	AN	1	34	19	7.5	5.5	6.5
45799	H100_DRIL52.055F2_33	Chile16_58_12	38	541	338	H100_DRIL52.055F2	5	AN	1	34	18	7.5	6	6.75
45800	H100_DRIL52.055F2_24	Chile16_58_3	38	542	329	H100_DRIL52.055F2	5	AN	1	34	17	.	6	6
45802	H100_DRIL52.055F2_19	Chile16_56_12	38	544	324	H100_DRIL52.055F2	5	AN	1	34	15	7.5	5.5	6.5
45803	H100_DRIL52.055F2_27	Chile16_58_6	38	545	332	H100_DRIL52.055F2	5	AN	1	34	14	.	5.5	5.5
45804	H100_DRIL32.090F2_33	Chile16_25_3	38	546	33	H100_DRIL32.090F2	1	AN	1	34	13	7	5.5	6.25
45806	H100	'	38	548	970	H100	1	AN	1	34	11	7	4	5.5
45807	H100_DRIL32.090F2_67	Chile16_23_9	38	549	67	H100_DRIL32.090F2	1	AN	1	34	10	7	4.5	5.75
45808	H100_DRIL32.090F2_16	Chile16_26_2	39	550	16	H100_DRIL32.090F2	1	AN	1	34	9	7	4	5.5
45810	H100_DRIL32.090F2_46	Chile16_27_6	39	552	46	H100_DRIL32.090F2	1	AN	1	34	7	7.5	5.5	6.5
45811	H100_DRIL32.090F2_65	Chile16_23_7	39	553	65	H100_DRIL32.090F2	1	AN	1	34	6	7	4.5	5.75
45812	H100_DRIL32.090F2_3	Chile16_24_3	39	554	3	H100_DRIL32.090F2	1	AN	1	34	5	7	5	6
45813	H100_DRIL32.090F2_48	Chile16_27_8	39	555	48	H100_DRIL32.090F2	1	AN	1	34	4	7	5	6
45814	H100_DRIL32.090F2_60	Chile16_23_2	39	556	60	H100_DRIL32.090F2	1	AN	1	34	3	7	5.5	6.25
45815	H100_DRIL32.090F2_35	Chile16_25_5	39	557	35	H100_DRIL32.090F2	1	AN	1	34	2	7	4	5.5
45816	H100	'	39	558	970	H100	1	AN	1	34	1	6.5	4	5.25
45817	H100_DRIL32.090F2_22	Chile16_26_8	39	559	22	H100_DRIL32.090F2	1	AN	1	35	1	6.5	4	5.25
45818	H100_DRIL32.090F2_56	Chile16_28_5	39	560	56	H100_DRIL32.090F2	1	AN	1	35	2	6.5	4	5.25
45819	H100_DRIL32.090F2_23	Chile16_26_9	39	561	23	H100_DRIL32.090F2	1	AN	1	35	3	6.5	3.5	5
45820	H100_DRIL32.090F2_61	Chile16_23_3	39	562	61	H100_DRIL32.090F2	1	AN	1	35	4	6.5	3	4.75
45821	H100_DRIL32.090F2_51	Chile16_27_11	40	563	51	H100_DRIL32.090F2	1	AN	1	35	5	7	4.5	5.75
45822	H100_DRIL32.090F2_7	Chile16_24_7	40	564	7	H100_DRIL32.090F2	1	AN	1	35	6	.	3.5	3.5
45823	H100_DRIL32.090F2_70	Chile16_23_12	40	565	70	H100_DRIL32.090F2	1	AN	1	35	7	7	4	5.5
45824	H100_DRIL32.090F2_8	Chile16_24_8	40	566	8	H100_DRIL32.090F2	1	AN	1	35	8	.	2.5	2.5
45825	H100_DRIL32.090F2_55	Chile16_28_4	40	567	55	H100_DRIL32.090F2	1	AN	1	35	9	7	4	5.5
45826	H100_DRIL32.090F2_4	Chile16_24_4	40	568	4	H100_DRIL32.090F2	1	AN	1	35	10	6.5	3.5	5
45827	H100_DRIL32.090F2_19	Chile16_26_5	40	569	19	H100_DRIL32.090F2	1	AN	1	35	11	7	4.5	5.75
45828	H100	'	40	570	970	H100	1	AN	1	35	12	6.5	3.5	5
45829	H100_DRIL32.090F2_17	Chile16_26_3	40	571	17	H100_DRIL32.090F2	1	AN	1	35	13	7	5.5	6.25
45830	H100_DRIL32.090F2_57	Chile16_28_6	40	572	57	H100_DRIL32.090F2	1	AN	1	35	14	7	5.5	6.25
45831	H100_DRIL32.090F2_58	Chile16_28_7	40	573	58	H100_DRIL32.090F2	1	AN	1	35	15	7	5.5	6.25
45832	H100_DRIL32.090F2_18	Chile16_26_4	40	574	18	H100_DRIL32.090F2	1	AN	1	35	16	7	5.5	6.25
45833	H100_DRIL32.090F2_24	Chile16_26_10	40	575	24	H100_DRIL32.090F2	1	AN	1	35	17	7	5	6
45834	H100_DRIL32.090F2_26	Chile16_26_12	40	576	26	H100_DRIL32.090F2	1	AN	1	35	18	7	4	5.5
45835	H100_DRIL32.090F2_11	Chile16_24_11	41	577	11	H100_DRIL32.090F2	1	AN	1	35	19	7	5.5	6.25
45836	DRIL32.090	'	41	578	957	DRIL32.090	1	AN	1	35	20	7	6	6.5
45837	H100_DRIL32.090F2_15	Chile16_26_1	41	579	15	H100_DRIL32.090F2	1	AN	1	35	21	7	5	6
45838	H100_DRIL32.090F2_40	Chile16_25_10	41	580	40	H100_DRIL32.090F2	1	AN	1	35	22	7	5.5	6.25
45839	H100_DRIL32.090F2_5	Chile16_24_5	41	581	5	H100_DRIL32.090F2	1	AN	1	35	23	7	5.5	6.25
45840	H100_DRIL32.090F2_59	Chile16_23_1	41	582	59	H100_DRIL32.090F2	1	AN	1	35	24	7	5.5	6.25
45841	H100_DRIL32.090F2_1	Chile16_24_1	41	583	1	H100_DRIL32.090F2	1	AN	1	36	24	7	6.5	6.75
45843	H100_DRIL32.090F2_44	Chile16_27_4	41	585	44	H100_DRIL32.090F2	1	AN	1	36	22	7	5.5	6.25
45844	H100_DRIL32.090F2_45	Chile16_27_5	41	586	45	H100_DRIL32.090F2	1	AN	1	36	21	6.5	5	5.75
45845	H100_DRIL32.090F2_21	Chile16_26_7	41	587	21	H100_DRIL32.090F2	1	AN	1	36	20	6.5	5	5.75
45846	H100_DRIL32.090F2_38	Chile16_25_8	41	588	38	H100_DRIL32.090F2	1	AN	1	36	19	7	5.5	6.25
45847	H100_DRIL32.090F2_6	Chile16_24_6	41	589	6	H100_DRIL32.090F2	1	AN	1	36	18	7	5.5	6.25
45848	H100_DRIL32.090F2_14	Chile16_24_14	41	590	14	H100_DRIL32.090F2	1	AN	1	36	17	7	5	6
45849	H100_DRIL32.090F2_49	Chile16_27_9	42	591	49	H100_DRIL32.090F2	1	AN	1	36	16	7	5.5	6.25
45850	H100_DRIL32.090F2_31	Chile16_25_1	42	592	31	H100_DRIL32.090F2	1	AN	1	36	15	7	5	6
45851	H100_DRIL32.090F2_13	Chile16_24_13	42	593	13	H100_DRIL32.090F2	1	AN	1	36	14	7	4	5.5
45852	H100_DRIL32.090F2_27	Chile16_26_13	42	594	27	H100_DRIL32.090F2	1	AN	1	36	13	7	5.5	6.25
45853	H100_DRIL32.095F2_47	Chile16_34_5	42	595	117	H100_DRIL32.095F2	2	AN	1	36	12	.	4	4
45854	H100	'	42	596	970	H100	2	AN	1	36	11	6.5	4	5.25
45855	H100_DRIL32.095F2_32	Chile16_32_7	42	597	102	H100_DRIL32.095F2	2	AN	1	36	10	7	6	6.5
45856	H100_DRIL32.095F2_74	Chile16_29_1	42	598	144	H100_DRIL32.095F2	2	AN	1	36	9	6.5	4	5.25
45857	H100_DRIL32.095F2_86	Chile16_29_13	42	599	156	H100_DRIL32.095F2	2	AN	1	36	8	.	4	4
45858	H100_DRIL32.095F2_2	Chile16_33_2	42	600	72	H100_DRIL32.095F2	2	AN	1	36	7	7	4.5	5.75
45859	H100_DRIL32.095F2_59	Chile16_34_17	42	601	129	H100_DRIL32.095F2	2	AN	1	36	6	7	4.5	5.75
45860	H100_DRIL32.095F2_13	Chile16_33_13	42	602	83	H100_DRIL32.095F2	2	AN	1	36	5	6.5	5.5	6
45861	H100_DRIL32.095F2_80	Chile16_29_7	42	603	150	H100_DRIL32.095F2	2	AN	1	36	4	7	5	6
45862	H100_DRIL32.095F2_26	Chile16_32_1	42	604	96	H100_DRIL32.095F2	2	AN	1	36	3	6.5	3	4.75
45864	H100_DRIL32.095F2_11	Chile16_33_11	43	605	81	H100_DRIL32.095F2	2	AN	1	36	1	6.5	4	5.25
45865	H100_DRIL32.095F2_28	Chile16_32_3	43	606	98	H100_DRIL32.095F2	2	AN	1	37	1	6.5	5	5.75
45866	H100_DRIL32.095F2_63	Chile16_30_3	43	607	133	H100_DRIL32.095F2	2	AN	1	37	2	7	4	5.5
45867	H100_DRIL32.095F2_54	Chile16_34_12	43	608	124	H100_DRIL32.095F2	2	AN	1	37	3	7	4	5.5
45868	H100_DRIL32.095F2_52	Chile16_34_10	43	609	122	H100_DRIL32.095F2	2	AN	1	37	4	7	3.5	5.25
45869	H100_DRIL32.095F2_45	Chile16_34_3	43	610	115	H100_DRIL32.095F2	2	AN	1	37	5	7	6	6.5
45870	H100	'	43	611	970	H100	2	AN	1	37	6	7	3	5
45871	H100_DRIL32.095F2_64	Chile16_30_4	43	612	134	H100_DRIL32.095F2	2	AN	1	37	7	7	5.5	6.25
45872	H100_DRIL32.095F2_42	Chile16_32_17	43	613	112	H100_DRIL32.095F2	2	AN	1	37	8	7	5	6
45873	H100_DRIL32.095F2_3	Chile16_33_3	43	614	73	H100_DRIL32.095F2	2	AN	1	37	9	7	4	5.5
45874	H100_DRIL32.095F2_29	Chile16_32_4	43	615	99	H100_DRIL32.095F2	2	AN	1	37	10	7	5	6
45875	H100_DRIL32.095F2_7	Chile16_33_7	43	616	77	H100_DRIL32.095F2	2	AN	1	37	11	7	4.5	5.75
45876	H100_DRIL32.095F2_58	Chile16_34_16	44	617	128	H100_DRIL32.095F2	2	AN	1	37	12	.	5.5	5.5
45877	H100_DRIL32.095F2_57	Chile16_34_15	44	618	127	H100_DRIL32.095F2	2	AN	1	37	13	7	5.5	6.25
45878	H100_DRIL32.095F2_68	Chile16_30_8	44	619	138	H100_DRIL32.095F2	2	AN	1	37	14	7	6	6.5
45879	H100	'	44	620	970	H100	2	AN	1	37	15	7	4	5.5
45880	H100_DRIL32.095F2_50	Chile16_34_8	44	621	120	H100_DRIL32.095F2	2	AN	1	37	16	7	6.5	6.75
45881	H100_DRIL32.095F2_49	Chile16_34_7	44	622	119	H100_DRIL32.095F2	2	AN	1	37	17	7	5.5	6.25
45882	H100_DRIL32.095F2_35	Chile16_32_10	44	623	105	H100_DRIL32.095F2	2	AN	1	37	18	7	5.5	6.25
45883	H100_DRIL32.095F2_76	Chile16_29_3	44	624	146	H100_DRIL32.095F2	2	AN	1	37	19	7	5.5	6.25
45884	H100_DRIL32.095F2_69	Chile16_30_9	44	625	139	H100_DRIL32.095F2	2	AN	1	37	20	7	6	6.5
45885	H100_DRIL32.095F2_10	Chile16_33_10	44	626	80	H100_DRIL32.095F2	2	AN	1	37	21	7	5.5	6.25
45886	H100	'	44	627	970	H100	2	AN	1	37	22	7	5	6
45887	H100_DRIL32.095F2_15	Chile16_31_1	44	628	85	H100_DRIL32.095F2	2	AN	1	37	23	7	5.5	6.25
45888	H100_DRIL32.095F2_51	Chile16_34_9	45	629	121	H100_DRIL32.095F2	2	AN	1	37	24	7	5.5	6.25
45889	H100_DRIL32.095F2_70	Chile16_30_10	45	630	140	H100_DRIL32.095F2	2	AN	1	38	24	7	5	6
45890	H100_DRIL32.095F2_24	Chile16_31_10	45	631	94	H100_DRIL32.095F2	2	AN	1	38	23	7	5	6
45891	H100_DRIL32.095F2_60	Chile16_34_18	45	632	130	H100_DRIL32.095F2	2	AN	1	38	22	7.5	6	6.75
45892	H100_DRIL32.095F2_73	Chile16_30_13	45	633	143	H100_DRIL32.095F2	2	AN	1	38	21	7	6	6.5
45893	H100_DRIL32.095F2_38	Chile16_32_13	45	634	108	H100_DRIL32.095F2	2	AN	1	38	20	7	5	6
45894	H100	'	45	635	970	H100	2	AN	1	38	19	7	4.5	5.75
45895	H100_DRIL32.095F2_53	Chile16_34_11	45	636	123	H100_DRIL32.095F2	2	AN	1	38	18	7	5.5	6.25
45896	H100_DRIL32.095F2_46	Chile16_34_4	45	637	116	H100_DRIL32.095F2	2	AN	1	38	17	7	5	6
45897	H100_DRIL32.095F2_79	Chile16_29_6	45	638	149	H100_DRIL32.095F2	2	AN	1	38	16	7	6	6.5
45898	DRIL32.095	'	45	639	958	DRIL32.095	2	AN	1	38	15	7.5	7	7.25
45899	H100_DRIL32.095F2_48	Chile16_34_6	45	640	118	H100_DRIL32.095F2	2	AN	1	38	14	7	5.5	6.25
45900	H100_DRIL32.095F2_19	Chile16_31_5	45	641	89	H100_DRIL32.095F2	2	AN	1	38	13	7	5.5	6.25
45901	H100_DRIL32.095F2_55	Chile16_34_13	46	642	125	H100_DRIL32.095F2	2	AN	1	38	12	7	5	6
45902	H100_DRIL32.095F2_56	Chile16_34_14	46	643	126	H100_DRIL32.095F2	2	AN	1	38	11	7	5.5	6.25
45903	H100_DRIL32.095F2_1	Chile16_33_1	46	644	71	H100_DRIL32.095F2	2	AN	1	38	10	7	4	5.5
45904	H100_DRIL32.095F2_39	Chile16_32_14	46	645	109	H100_DRIL32.095F2	2	AN	1	38	9	7	5.5	6.25
45905	H100_DRIL32.095F2_44	Chile16_34_2	46	646	114	H100_DRIL32.095F2	2	AN	1	38	8	7	5.5	6.25
45906	H100_DRIL32.095F2_16	Chile16_31_2	46	647	86	H100_DRIL32.095F2	2	AN	1	38	7	7	5	6
45907	H100_DRIL32.095F2_21	Chile16_31_7	46	648	91	H100_DRIL32.095F2	2	AN	1	38	6	7	4	5.5
45908	H100_DRIL32.095F2_83	Chile16_29_10	46	649	153	H100_DRIL32.095F2	2	AN	1	38	5	6.5	4	5.25
45909	H100_DRIL72.232F2_7	Chile16_123_7	46	650	900	H100_DRIL72.232F2	13	AN	1	38	4	6.5	4	5.25
45910	H100_DRIL72.232F2_14	Chile16_118_5	46	651	907	H100_DRIL72.232F2	13	AN	1	38	3	7	3	5
45911	H100	'	46	652	970	H100	13	AN	1	38	2	6	3.5	4.75
45912	H100_DRIL72.232F2_56	Chile16_122_8	47	653	949	H100_DRIL72.232F2	13	AN	1	38	1	6.5	3.5	5
45913	H100_DRIL72.232F2_32	Chile16_120_6	47	654	925	H100_DRIL72.232F2	13	AN	1	39	1	6.5	4	5.25
45914	H100_DRIL72.232F2_17	Chile16_118_8	47	655	910	H100_DRIL72.232F2	13	AN	1	39	2	6.5	3	4.75
45915	H100_DRIL72.232F2_31	Chile16_120_5	47	656	924	H100_DRIL72.232F2	13	AN	1	39	3	6.5	3	4.75
45916	H100	'	47	657	970	H100	13	AN	1	39	4	6.5	3	4.75
45917	H100_DRIL72.232F2_1	Chile16_123_1	47	658	894	H100_DRIL72.232F2	13	AN	1	39	5	6	3	4.5
45918	H100_DRIL72.232F2_26	Chile16_119_7	47	659	919	H100_DRIL72.232F2	13	AN	1	39	6	6.5	4	5.25
45919	H100_DRIL72.232F2_39	Chile16_121_2	47	660	932	H100_DRIL72.232F2	13	AN	1	39	7	7	6	6.5
45920	H100_DRIL72.232F2_49	Chile16_122_1	47	661	942	H100_DRIL72.232F2	13	AN	1	39	8	6.5	4	5.25
45921	H100_DRIL72.232F2_10	Chile16_118_1	47	662	903	H100_DRIL72.232F2	13	AN	1	39	9	7	4	5.5
45922	DRIL72.232	'	47	663	969	DRIL72.232	13	AN	1	39	10	7	5.5	6.25
45925	H100_DRIL72.232F2_22	Chile16_119_3	47	666	915	H100_DRIL72.232F2	13	AN	1	39	13	7	5.5	6.25
45926	H100_DRIL72.232F2_8	Chile16_123_8	47	667	901	H100_DRIL72.232F2	13	AN	1	39	14	.	4	4
45927	H100_DRIL72.232F2_9	Chile16_123_9	48	668	902	H100_DRIL72.232F2	13	AN	1	39	15	6.5	5.5	6
45929	H100	'	48	670	970	H100	13	AN	1	39	17	7	4	5.5
45930	H100_DRIL72.232F2_62	Chile16_122_14	48	671	955	H100_DRIL72.232F2	13	AN	1	39	18	7	5	6
45931	H100_DRIL72.232F2_40	Chile16_121_3	48	672	933	H100_DRIL72.232F2	13	AN	1	39	19	7	5	6
45932	H100_DRIL72.232F2_11	Chile16_118_2	48	673	904	H100_DRIL72.232F2	13	AN	1	39	20	7	5	6
45933	H100_DRIL72.232F2_16	Chile16_118_7	48	674	909	H100_DRIL72.232F2	13	AN	1	39	21	7	5.5	6.25
45934	H100_DRIL72.232F2_43	Chile16_121_6	48	675	936	H100_DRIL72.232F2	13	AN	1	39	22	7	6.5	6.75
45935	H100_DRIL72.232F2_33	Chile16_120_7	48	676	926	H100_DRIL72.232F2	13	AN	1	39	23	.	5.5	5.5
45936	H100_DRIL72.232F2_57	Chile16_122_9	48	677	950	H100_DRIL72.232F2	13	AN	1	39	24	.	5.5	5.5
45937	H100_DRIL72.232F2_30	Chile16_120_4	48	678	923	H100_DRIL72.232F2	13	AN	1	40	24	7	6	6.5
45938	H100_DRIL72.232F2_3	Chile16_123_3	48	679	896	H100_DRIL72.232F2	13	AN	1	40	23	7	5.5	6.25
45939	H100_DRIL72.232F2_37	Chile16_120_11	48	680	930	H100_DRIL72.232F2	13	AN	1	40	22	7	5.5	6.25
45941	H100_DRIL72.232F2_4	Chile16_123_4	48	682	897	H100_DRIL72.232F2	13	AN	1	40	20	6.5	5	5.75
45942	H100_DRIL72.232F2_13	Chile16_118_4	48	683	906	H100_DRIL72.232F2	13	AN	1	40	19	.	5.5	5.5
45943	H100_DRIL72.232F2_35	Chile16_120_9	48	684	928	H100_DRIL72.232F2	13	AN	1	40	18	7	6	6.5
45944	H100_DRIL72.232F2_44	Chile16_121_7	48	685	937	H100_DRIL72.232F2	13	AN	1	40	17	.	3	3
45945	H100_DRIL72.232F2_45	Chile16_121_8	49	686	938	H100_DRIL72.232F2	13	AN	1	40	16	7	4	5.5
45946	H100_DRIL72.232F2_50	Chile16_122_2	49	687	943	H100_DRIL72.232F2	13	AN	1	40	15	6.5	5	5.75
45947	H100_DRIL72.232F2_19	Chile16_118_10	49	688	912	H100_DRIL72.232F2	13	AN	1	40	14	7	3	5
45948	H100_DRIL72.232F2_42	Chile16_121_5	49	689	935	H100_DRIL72.232F2	13	AN	1	40	13	7	5	6
45949	H100_DRIL72.232F2_38	Chile16_121_1	49	690	931	H100_DRIL72.232F2	13	AN	1	40	12	7	4.5	5.75
45950	H100_DRIL72.232F2_21	Chile16_119_2	49	691	914	H100_DRIL72.232F2	13	AN	1	40	11	7	5.5	6.25
45951	H100_DRIL72.232F2_5	Chile16_123_5	49	692	898	H100_DRIL72.232F2	13	AN	1	40	10	6.5	5	5.75
45952	H100	'	49	693	970	H100	13	AN	1	40	9	6.5	4.5	5.5
45953	H100_DRIL72.232F2_36	Chile16_120_10	49	694	929	H100_DRIL72.232F2	13	AN	1	40	8	6.5	4.5	5.5
45954	H100_DRIL72.232F2_24	Chile16_119_5	49	695	917	H100_DRIL72.232F2	13	AN	1	40	7	7	3.5	5.25
45955	H100_DRIL72.232F2_46	Chile16_121_9	49	696	939	H100_DRIL72.232F2	13	AN	1	40	6	6.5	3	4.75
45956	H100_DRIL72.232F2_15	Chile16_118_6	49	697	908	H100_DRIL72.232F2	13	AN	1	40	5	7	3	5
45957	H100_DRIL72.232F2_27	Chile16_120_1	49	698	920	H100_DRIL72.232F2	13	AN	1	40	4	6.5	2.5	4.5
45958	H100_DRIL72.232F2_51	Chile16_122_3	49	699	944	H100_DRIL72.232F2	13	AN	1	40	3	6.5	3	4.75
45959	H100_DRIL72.232F2_58	Chile16_122_10	49	700	951	H100_DRIL72.232F2	13	AN	1	40	2	6.5	5	5.75
41550	H100	'	1	5717	970	H100	2	VA	1	23	54	7	5.5	6.25
41551	H100_DRIL32.095F2_19	Chile16_31_5	1	5718	89	H100_DRIL32.095F2	2	VA	1	23	55	7	5	6
41552	H100_DRIL32.095F2_74	Chile16_29_1	1	5719	144	H100_DRIL32.095F2	2	VA	1	23	56	7	5	6
41553	H100_DRIL32.095F2_24	Chile16_31_10	1	5720	94	H100_DRIL32.095F2	2	VA	1	23	57	7	5	6
41554	H100_DRIL32.095F2_17	Chile16_31_3	1	5721	87	H100_DRIL32.095F2	2	VA	1	23	58	7.5	5.5	6.5
41555	H100_DRIL32.095F2_67	Chile16_30_7	1	5722	137	H100_DRIL32.095F2	2	VA	1	23	59	7	5	6
41556	H100_DRIL32.095F2_38	Chile16_32_13	1	5723	108	H100_DRIL32.095F2	2	VA	1	23	60	6.5	4.5	5.5
41557	H100_DRIL32.095F2_61	Chile16_30_1	1	5724	131	H100_DRIL32.095F2	2	VA	1	23	61	7	5	6
41558	H100_DRIL32.095F2_21	Chile16_31_7	1	5725	91	H100_DRIL32.095F2	2	VA	1	23	62	7	5	6
41559	H100_DRIL32.095F2_30	Chile16_32_5	1	5726	100	H100_DRIL32.095F2	2	VA	1	23	63	7	4.5	5.75
41560	H100_DRIL32.095F2_37	Chile16_32_12	1	5727	107	H100_DRIL32.095F2	2	VA	1	23	64	7	4	5.5
41561	H100_DRIL32.095F2_55	Chile16_34_13	1	5728	125	H100_DRIL32.095F2	2	VA	1	23	65	6	4	5
41562	H100_DRIL32.095F2_31	Chile16_32_6	1	5729	101	H100_DRIL32.095F2	2	VA	1	23	66	7	5	6
41563	H100_DRIL32.095F2_51	Chile16_34_9	1	5730	121	H100_DRIL32.095F2	2	VA	1	23	67	6.5	4.5	5.5
41564	H100_DRIL32.095F2_44	Chile16_34_2	1	5731	114	H100_DRIL32.095F2	2	VA	1	23	68	7	5	6
41565	H100_DRIL32.095F2_47	Chile16_34_5	1	5732	117	H100_DRIL32.095F2	2	VA	1	24	68	7.5	6	6.75
41567	H100_DRIL32.095F2_18	Chile16_31_4	1	5734	88	H100_DRIL32.095F2	2	VA	1	24	66	7	4	5.5
41568	H100_DRIL32.095F2_3	Chile16_33_3	1	5735	73	H100_DRIL32.095F2	2	VA	1	24	65	5.5	4	4.75
41569	H100_DRIL32.095F2_53	Chile16_34_11	1	5736	123	H100_DRIL32.095F2	2	VA	1	24	64	7	4.5	5.75
41570	H100_DRIL32.095F2_66	Chile16_30_6	1	5737	136	H100_DRIL32.095F2	2	VA	1	24	63	7	4.5	5.75
41571	H100_DRIL32.095F2_54	Chile16_34_12	2	5738	124	H100_DRIL32.095F2	2	VA	1	24	62	7	5	6
41572	H100_DRIL32.095F2_15	Chile16_31_1	2	5739	85	H100_DRIL32.095F2	2	VA	1	24	61	7	4.5	5.75
41573	H100	'	2	5740	970	H100	2	VA	1	24	60	7	4	5.5
41574	H100_DRIL32.095F2_16	Chile16_31_2	2	5741	86	H100_DRIL32.095F2	2	VA	1	24	59	7	4.5	5.75
41575	H100_DRIL32.095F2_5	Chile16_33_5	2	5742	75	H100_DRIL32.095F2	2	VA	1	24	58	7	5	6
41576	H100_DRIL32.095F2_39	Chile16_32_14	2	5743	109	H100_DRIL32.095F2	2	VA	1	24	57	7.5	5	6.25
41577	H100_DRIL32.095F2_83	Chile16_29_10	2	5744	153	H100_DRIL32.095F2	2	VA	1	24	56	7.5	5.5	6.5
41578	H100_DRIL32.095F2_81	Chile16_29_8	2	5745	151	H100_DRIL32.095F2	2	VA	1	24	55	7	5.5	6.25
41579	H100_DRIL32.095F2_32	Chile16_32_7	2	5746	102	H100_DRIL32.095F2	2	VA	1	24	54	7	4	5.5
41580	H100_DRIL32.095F2_29	Chile16_32_4	2	5747	99	H100_DRIL32.095F2	2	VA	1	24	53	7	5.5	6.25
41581	H100_DRIL32.095F2_56	Chile16_34_14	2	5748	126	H100_DRIL32.095F2	2	VA	1	24	52	7.5	5.5	6.5
41582	H100_DRIL32.095F2_35	Chile16_32_10	2	5749	105	H100_DRIL32.095F2	2	VA	1	24	51	6.5	3.5	5
41583	H100_DRIL32.095F2_58	Chile16_34_16	2	5750	128	H100_DRIL32.095F2	2	VA	1	24	50	7.5	5	6.25
41584	H100_DRIL32.095F2_71	Chile16_30_11	2	5751	141	H100_DRIL32.095F2	2	VA	1	24	49	7	5	6
41585	H100_DRIL32.095F2_26	Chile16_32_1	2	5752	96	H100_DRIL32.095F2	2	VA	1	24	48	7	4.5	5.75
41586	H100_DRIL32.095F2_41	Chile16_32_16	2	5753	111	H100_DRIL32.095F2	2	VA	1	24	47	7	5.5	6.25
41589	H100_DRIL32.095F2_82	Chile16_29_9	2	5756	152	H100_DRIL32.095F2	2	VA	1	24	44	7	4.5	5.75
41590	H100_DRIL32.095F2_75	Chile16_29_2	2	5757	145	H100_DRIL32.095F2	2	VA	1	24	43	7.5	6	6.75
41591	H100_DRIL32.095F2_64	Chile16_30_4	2	5758	134	H100_DRIL32.095F2	2	VA	1	24	42	6.5	5.5	6
41592	H100_DRIL32.095F2_76	Chile16_29_3	3	5759	146	H100_DRIL32.095F2	2	VA	1	24	41	7	5.5	6.25
41593	H100_DRIL32.095F2_4	Chile16_33_4	3	5760	74	H100_DRIL32.095F2	2	VA	1	24	40	7	4.5	5.75
41594	H100_DRIL32.095F2_25	Chile16_31_11	3	5761	95	H100_DRIL32.095F2	2	VA	1	24	39	7	5.5	6.25
41595	H100_DRIL32.095F2_57	Chile16_34_15	3	5762	127	H100_DRIL32.095F2	2	VA	1	24	38	7.5	5.5	6.5
41596	H100_DRIL32.095F2_85	Chile16_29_12	3	5763	155	H100_DRIL32.095F2	2	VA	1	24	37	7	5.5	6.25
41597	H100_DRIL32.095F2_28	Chile16_32_3	3	5764	98	H100_DRIL32.095F2	2	VA	1	24	36	7.5	5.5	6.5
41598	H100_DRIL32.095F2_13	Chile16_33_13	3	5765	83	H100_DRIL32.095F2	2	VA	1	24	35	7.5	5.5	6.5
41599	H100_DRIL32.095F2_78	Chile16_29_5	3	5766	148	H100_DRIL32.095F2	2	VA	1	24	34	7.5	5	6.25
41600	H100_DRIL32.095F2_59	Chile16_34_17	3	5767	129	H100_DRIL32.095F2	2	VA	1	24	33	7	5	6
41601	H100_DRIL32.095F2_1	Chile16_33_1	3	5768	71	H100_DRIL32.095F2	2	VA	1	24	32	6.5	4.5	5.5
41602	H100_DRIL32.095F2_52	Chile16_34_10	3	5769	122	H100_DRIL32.095F2	2	VA	1	24	31	7	5	6
41603	H100	'	3	5770	970	H100	2	VA	1	24	30	6.5	4	5.25
41604	H100_DRIL32.095F2_20	Chile16_31_6	3	5771	90	H100_DRIL32.095F2	2	VA	1	24	29	7	4.5	5.75
41605	H100_DRIL32.095F2_12	Chile16_33_12	3	5772	82	H100_DRIL32.095F2	2	VA	1	24	28	6.5	4.5	5.5
41606	H100_DRIL32.095F2_14	Chile16_33_14	3	5773	84	H100_DRIL32.095F2	2	VA	1	24	27	7	4	5.5
41607	H100_DRIL32.095F2_79	Chile16_29_6	3	5774	149	H100_DRIL32.095F2	2	VA	1	24	26	7	4.5	5.75
41608	H100_DRIL32.095F2_69	Chile16_30_9	3	5775	139	H100_DRIL32.095F2	2	VA	1	24	25	7	5	6
41609	H100_DRIL32.095F2_84	Chile16_29_11	3	5776	154	H100_DRIL32.095F2	2	VA	1	24	24	7	4.5	5.75
41610	H100_DRIL32.095F2_63	Chile16_30_3	3	5777	133	H100_DRIL32.095F2	2	VA	1	24	23	7	5	6
41611	H100_DRIL32.095F2_33	Chile16_32_8	3	5778	103	H100_DRIL32.095F2	2	VA	1	24	22	7	5	6
41612	DRIL32.095	'	3	5779	958	DRIL32.095	2	VA	1	24	21	7	5.5	6.25
41613	H100_DRIL32.095F2_48	Chile16_34_6	4	5780	118	H100_DRIL32.095F2	2	VA	1	24	20	7.5	5	6.25
41614	H100_DRIL32.095F2_36	Chile16_32_11	4	5781	106	H100_DRIL32.095F2	2	VA	1	24	19	7	5.5	6.25
41615	H100_DRIL32.095F2_45	Chile16_34_3	4	5782	115	H100_DRIL32.095F2	2	VA	1	24	18	7	5	6
41616	H100_DRIL32.095F2_77	Chile16_29_4	4	5783	147	H100_DRIL32.095F2	2	VA	1	24	17	7.5	5	6.25
41617	H100_DRIL32.095F2_2	Chile16_33_2	4	5784	72	H100_DRIL32.095F2	2	VA	1	24	16	6.5	4	5.25
41618	H100_DRIL32.095F2_43	Chile16_34_1	4	5785	113	H100_DRIL32.095F2	2	VA	1	24	15	7	4	5.5
41619	H100_DRIL32.095F2_49	Chile16_34_7	4	5786	119	H100_DRIL32.095F2	2	VA	1	24	14	6.5	4	5.25
41620	H100_DRIL32.095F2_6	Chile16_33_6	4	5787	76	H100_DRIL32.095F2	2	VA	1	24	13	7	4.5	5.75
41621	H100_DRIL32.095F2_60	Chile16_34_18	4	5788	130	H100_DRIL32.095F2	2	VA	1	24	12	6.5	4	5.25
41622	H100_DRIL32.095F2_65	Chile16_30_5	4	5789	135	H100_DRIL32.095F2	2	VA	1	24	11	7	4	5.5
41623	H100_DRIL32.095F2_23	Chile16_31_9	4	5790	93	H100_DRIL32.095F2	2	VA	1	24	10	7.5	4	5.75
41624	H100_DRIL32.095F2_22	Chile16_31_8	4	5791	92	H100_DRIL32.095F2	2	VA	1	24	9	7	4	5.5
41625	H100	'	4	5792	970	H100	2	VA	1	24	8	7	4	5.5
41626	H100_DRIL32.095F2_72	Chile16_30_12	4	5793	142	H100_DRIL32.095F2	2	VA	1	24	7	6.5	4.5	5.5
41627	H100_DRIL32.095F2_10	Chile16_33_10	4	5794	80	H100_DRIL32.095F2	2	VA	1	24	6	6.5	4	5.25
41628	H100_DRIL32.095F2_11	Chile16_33_11	4	5795	81	H100_DRIL32.095F2	2	VA	1	24	5	7	4.5	5.75
41629	H100_DRIL32.095F2_50	Chile16_34_8	4	5796	120	H100_DRIL32.095F2	2	VA	1	24	4	7	4.5	5.75
41630	H100_DRIL32.095F2_34	Chile16_32_9	4	5797	104	H100_DRIL32.095F2	2	VA	1	24	3	7	4	5.5
41631	H100_DRIL32.095F2_40	Chile16_32_15	4	5798	110	H100_DRIL32.095F2	2	VA	1	24	2	7	4	5.5
41632	H100_DRIL32.095F2_73	Chile16_30_13	4	5799	143	H100_DRIL32.095F2	2	VA	1	24	1	7	4.5	5.75
41633	H100_DRIL32.095F2_80	Chile16_29_7	4	5800	150	H100_DRIL32.095F2	2	VA	1	25	1	7.5	5	6.25
41634	H100_DRIL32.095F2_46	Chile16_34_4	5	5801	116	H100_DRIL32.095F2	2	VA	1	25	2	7	4.5	5.75
41635	H100_DRIL32.095F2_9	Chile16_33_9	5	5802	79	H100_DRIL32.095F2	2	VA	1	25	3	7	5	6
41636	H100_DRIL32.095F2_62	Chile16_30_2	5	5803	132	H100_DRIL32.095F2	2	VA	1	25	4	7	5	6
41637	H100_DRIL32.095F2_42	Chile16_32_17	5	5804	112	H100_DRIL32.095F2	2	VA	1	25	5	7.5	5	6.25
41638	H100_DRIL32.095F2_70	Chile16_30_10	5	5805	140	H100_DRIL32.095F2	2	VA	1	25	6	6.5	5	5.75
41639	H100_DRIL32.095F2_68	Chile16_30_8	5	5806	138	H100_DRIL32.095F2	2	VA	1	25	7	7.5	5.5	6.5
41640	H100_DRIL32.095F2_86	Chile16_29_13	5	5807	156	H100_DRIL32.095F2	2	VA	1	25	8	7	5	6
41641	H100	'	5	5808	970	H100	2	VA	1	25	9	7	4.5	5.75
41642	H100_DRIL62.156F2_46	Chile16_104_4	5	5809	733	H100_DRIL62.156F2	10	VA	1	25	10	7.5	4.5	6
41643	H100_DRIL62.156F2_59	Chile16_105_8	5	5810	746	H100_DRIL62.156F2	10	VA	1	25	11	7.5	5	6.25
41644	H100_DRIL62.156F2_1	Chile16_100_1	5	5811	688	H100_DRIL62.156F2	10	VA	1	25	12	7.5	5	6.25
41645	H100_DRIL62.156F2_24	Chile16_102_5	5	5812	711	H100_DRIL62.156F2	10	VA	1	25	13	7.5	5	6.25
41646	H100_DRIL62.156F2_27	Chile16_102_8	5	5813	714	H100_DRIL62.156F2	10	VA	1	25	14	7.5	6	6.75
41647	H100_DRIL62.156F2_41	Chile16_103_9	5	5814	728	H100_DRIL62.156F2	10	VA	1	25	15	7.5	5.5	6.5
41648	H100_DRIL62.156F2_36	Chile16_103_4	5	5815	723	H100_DRIL62.156F2	10	VA	1	25	16	7	5	6
41649	H100	'	5	5816	970	H100	10	VA	1	25	17	7	5	6
41650	H100_DRIL62.156F2_43	Chile16_104_1	5	5817	730	H100_DRIL62.156F2	10	VA	1	25	18	7.5	6	6.75
41651	H100_DRIL62.156F2_15	Chile16_101_5	5	5818	702	H100_DRIL62.156F2	10	VA	1	25	19	7	6	6.5
41652	H100_DRIL62.156F2_57	Chile16_105_6	5	5819	744	H100_DRIL62.156F2	10	VA	1	25	20	7.5	6	6.75
41653	H100_DRIL62.156F2_29	Chile16_102_10	5	5820	716	H100_DRIL62.156F2	10	VA	1	25	21	7.5	6	6.75
41654	H100_DRIL62.156F2_33	Chile16_103_1	5	5821	720	H100_DRIL62.156F2	10	VA	1	25	22	7.5	6	6.75
41656	H100_DRIL62.156F2_21	Chile16_102_2	6	5822	708	H100_DRIL62.156F2	10	VA	1	25	24	7	4	5.5
41657	H100_DRIL62.156F2_60	Chile16_105_9	6	5823	747	H100_DRIL62.156F2	10	VA	1	25	25	7	5	6
41659	H100_DRIL62.156F2_5	Chile16_100_5	6	5825	692	H100_DRIL62.156F2	10	VA	1	25	27	7	5	6
41660	H100_DRIL62.156F2_25	Chile16_102_6	6	5826	712	H100_DRIL62.156F2	10	VA	1	25	28	7	4.5	5.75
41661	H100_DRIL62.156F2_17	Chile16_101_7	6	5827	704	H100_DRIL62.156F2	10	VA	1	25	29	7.5	5.5	6.5
41662	H100_DRIL62.156F2_54	Chile16_105_3	6	5828	741	H100_DRIL62.156F2	10	VA	1	25	30	7	5.5	6.25
41663	H100_DRIL62.156F2_37	Chile16_103_5	6	5829	724	H100_DRIL62.156F2	10	VA	1	25	31	7.5	6	6.75
41664	H100_DRIL62.156F2_48	Chile16_104_6	6	5830	735	H100_DRIL62.156F2	10	VA	1	25	32	7	5.5	6.25
41665	H100_DRIL62.156F2_19	Chile16_101_9	6	5831	706	H100_DRIL62.156F2	10	VA	1	25	33	7	5.5	6.25
41666	H100_DRIL62.156F2_61	Chile16_105_10	6	5832	748	H100_DRIL62.156F2	10	VA	1	25	34	7.5	5.5	6.5
41667	H100_DRIL62.156F2_35	Chile16_103_3	6	5833	722	H100_DRIL62.156F2	10	VA	1	25	35	7.5	5.5	6.5
41668	H100	'	6	5834	970	H100	10	VA	1	25	36	6.5	4	5.25
41669	H100_DRIL62.156F2_8	Chile16_100_8	6	5835	695	H100_DRIL62.156F2	10	VA	1	25	37	7.5	5	6.25
41670	H100_DRIL62.156F2_23	Chile16_102_4	6	5836	710	H100_DRIL62.156F2	10	VA	1	25	38	7	5	6
41672	H100_DRIL62.156F2_22	Chile16_102_3	6	5838	709	H100_DRIL62.156F2	10	VA	1	25	40	7.5	5.5	6.5
41673	H100_DRIL62.156F2_14	Chile16_101_4	6	5839	701	H100_DRIL62.156F2	10	VA	1	25	41	7	6	6.5
41674	H100_DRIL62.156F2_47	Chile16_104_5	6	5840	734	H100_DRIL62.156F2	10	VA	1	25	42	7.5	5.5	6.5
41675	H100_DRIL62.156F2_13	Chile16_101_3	6	5841	700	H100_DRIL62.156F2	10	VA	1	25	43	7.5	5.5	6.5
41676	H100_DRIL62.156F2_38	Chile16_103_6	6	5842	725	H100_DRIL62.156F2	10	VA	1	25	44	7.5	5.5	6.5
41677	H100_DRIL62.156F2_58	Chile16_105_7	7	5843	745	H100_DRIL62.156F2	10	VA	1	25	45	7	6	6.5
41678	H100_DRIL62.156F2_30	Chile16_102_11	7	5844	717	H100_DRIL62.156F2	10	VA	1	25	46	7.5	5.5	6.5
41679	H100_DRIL62.156F2_44	Chile16_104_2	7	5845	731	H100_DRIL62.156F2	10	VA	1	25	47	7	5.5	6.25
41680	H100_DRIL62.156F2_56	Chile16_105_5	7	5846	743	H100_DRIL62.156F2	10	VA	1	25	48	7.5	5.5	6.5
41681	H100_DRIL62.156F2_52	Chile16_105_1	7	5847	739	H100_DRIL62.156F2	10	VA	1	25	49	7	4.5	5.75
41682	H100_DRIL62.156F2_51	Chile16_104_9	7	5848	738	H100_DRIL62.156F2	10	VA	1	25	50	7.5	5	6.25
41683	H100_DRIL62.156F2_62	Chile16_105_11	7	5849	749	H100_DRIL62.156F2	10	VA	1	25	51	7.5	5	6.25
41684	H100_DRIL62.156F2_40	Chile16_103_8	7	5850	727	H100_DRIL62.156F2	10	VA	1	25	52	7	4.5	5.75
41685	H100_DRIL62.156F2_4	Chile16_100_4	7	5851	691	H100_DRIL62.156F2	10	VA	1	25	53	7.5	5	6.25
41686	H100_DRIL62.156F2_28	Chile16_102_9	7	5852	715	H100_DRIL62.156F2	10	VA	1	25	54	7.5	5.5	6.5
41687	H100_DRIL62.156F2_39	Chile16_103_7	7	5853	726	H100_DRIL62.156F2	10	VA	1	25	55	7	5.5	6.25
41688	H100_DRIL62.156F2_50	Chile16_104_8	7	5854	737	H100_DRIL62.156F2	10	VA	1	25	56	7	5.5	6.25
41689	H100_DRIL62.156F2_34	Chile16_103_2	7	5855	721	H100_DRIL62.156F2	10	VA	1	25	57	7	5	6
41690	H100_DRIL62.156F2_10	Chile16_100_10	7	5856	697	H100_DRIL62.156F2	10	VA	1	25	58	7	5	6
41691	H100_DRIL62.156F2_11	Chile16_101_1	7	5857	698	H100_DRIL62.156F2	10	VA	1	25	59	6.5	5	5.75
41692	H100_DRIL62.156F2_2	Chile16_100_2	7	5858	689	H100_DRIL62.156F2	10	VA	1	25	60	7	5.5	6.25
41693	H100	'	7	5859	970	H100	10	VA	1	25	61	7	4	5.5
41694	H100_DRIL62.156F2_55	Chile16_105_4	7	5860	742	H100_DRIL62.156F2	10	VA	1	25	62	7	5	6
41695	DRIL62.156	'	7	5861	966	DRIL62.156	10	VA	1	25	63	7.5	4	5.75
41696	H100_DRIL62.156F2_32	Chile16_102_13	7	5862	719	H100_DRIL62.156F2	10	VA	1	25	64	7	4	5.5
41697	H100_DRIL62.156F2_20	Chile16_102_1	7	5863	707	H100_DRIL62.156F2	10	VA	1	25	65	7.5	6	6.75
41698	H100_DRIL62.156F2_16	Chile16_101_6	8	5864	703	H100_DRIL62.156F2	10	VA	1	25	66	7	5.5	6.25
41700	H100_DRIL62.156F2_45	Chile16_104_3	8	5866	732	H100_DRIL62.156F2	10	VA	1	25	68	7.5	6	6.75
41701	H100_DRIL62.156F2_26	Chile16_102_7	8	5867	713	H100_DRIL62.156F2	10	VA	1	26	68	7.5	6.5	7
41702	H100_DRIL62.156F2_7	Chile16_100_7	8	5868	694	H100_DRIL62.156F2	10	VA	1	26	67	7	5.5	6.25
41703	H100_DRIL62.156F2_12	Chile16_101_2	8	5869	699	H100_DRIL62.156F2	10	VA	1	26	66	6.5	4	5.25
41704	H100_DRIL62.156F2_9	Chile16_100_9	8	5870	696	H100_DRIL62.156F2	10	VA	1	26	65	7	5.5	6.25
41705	H100_DRIL62.156F2_3	Chile16_100_3	8	5871	690	H100_DRIL62.156F2	10	VA	1	26	64	6.5	5	5.75
41706	H100_DRIL62.156F2_31	Chile16_102_12	8	5872	718	H100_DRIL62.156F2	10	VA	1	26	63	7.5	5.5	6.5
41707	H100_DRIL62.156F2_42	Chile16_103_10	8	5873	729	H100_DRIL62.156F2	10	VA	1	26	62	7	4	5.5
41708	H100_DRIL62.156F2_53	Chile16_105_2	8	5874	740	H100_DRIL62.156F2	10	VA	1	26	61	7	5	6
41709	H100_DRIL62.156F2_49	Chile16_104_7	8	5875	736	H100_DRIL62.156F2	10	VA	1	26	60	7	4.5	5.75
41710	H100_DRIL62.156F2_63	Chile16_105_12	8	5876	750	H100_DRIL62.156F2	10	VA	1	26	59	7	5	6
41711	H100_DRIL52.268F2_54	Chile16_73_14	8	5877	528	H100_DRIL52.268F2	7	VA	1	26	58	7	4	5.5
41712	H100_DRIL52.268F2_17	Chile16_74_7	8	5878	491	H100_DRIL52.268F2	7	VA	1	26	57	6.5	4	5.25
41713	H100_DRIL52.268F2_50	Chile16_73_10	8	5879	524	H100_DRIL52.268F2	7	VA	1	26	56	7	5	6
41714	H100_DRIL52.268F2_68	Chile16_71_12	8	5880	542	H100_DRIL52.268F2	7	VA	1	26	55	7	4	5.5
41715	H100	'	8	5881	970	H100	7	VA	1	26	54	7	3.5	5.25
41716	H100_DRIL52.268F2_5	Chile16_75_5	8	5882	479	H100_DRIL52.268F2	7	VA	1	26	53	6.5	4	5.25
41718	H100_DRIL52.268F2_23	Chile16_74_13	8	5884	497	H100_DRIL52.268F2	7	VA	1	26	51	7	4.5	5.75
41719	H100_DRIL52.268F2_10	Chile16_75_10	9	5885	484	H100_DRIL52.268F2	7	VA	1	26	50	7	4.5	5.75
41720	H100	'	9	5886	970	H100	7	VA	1	26	49	7	4	5.5
41721	H100_DRIL52.268F2_32	Chile16_76_9	9	5887	506	H100_DRIL52.268F2	7	VA	1	26	48	6.5	4	5.25
41722	H100_DRIL52.268F2_57	Chile16_71_1	9	5888	531	H100_DRIL52.268F2	7	VA	1	26	47	7	4.5	5.75
41723	H100_DRIL52.268F2_49	Chile16_73_9	9	5889	523	H100_DRIL52.268F2	7	VA	1	26	46	7	5	6
41724	H100_DRIL52.268F2_20	Chile16_74_10	9	5890	494	H100_DRIL52.268F2	7	VA	1	26	45	7	5	6
41725	H100_DRIL52.268F2_12	Chile16_74_2	9	5891	486	H100_DRIL52.268F2	7	VA	1	26	44	7	5.5	6.25
41726	H100_DRIL52.268F2_11	Chile16_74_1	9	5892	485	H100_DRIL52.268F2	7	VA	1	26	43	7	5	6
41727	H100_DRIL52.268F2_13	Chile16_74_3	9	5893	487	H100_DRIL52.268F2	7	VA	1	26	42	6.5	5	5.75
41728	H100_DRIL52.268F2_40	Chile16_76_17	9	5894	514	H100_DRIL52.268F2	7	VA	1	26	41	7	5	6
41729	H100_DRIL52.268F2_18	Chile16_74_8	9	5895	492	H100_DRIL52.268F2	7	VA	1	26	40	7	4	5.5
41730	H100_DRIL52.268F2_59	Chile16_71_3	9	5896	533	H100_DRIL52.268F2	7	VA	1	26	39	7	4	5.5
41731	H100_DRIL52.268F2_63	Chile16_71_7	9	5897	537	H100_DRIL52.268F2	7	VA	1	26	38	7	4	5.5
41732	H100_DRIL52.268F2_61	Chile16_71_5	9	5898	535	H100_DRIL52.268F2	7	VA	1	26	37	7	4	5.5
41733	H100	'	9	5899	970	H100	7	VA	1	26	36	7	3	5
41734	H100_DRIL52.268F2_28	Chile16_76_5	9	5900	502	H100_DRIL52.268F2	7	VA	1	26	35	7	3.5	5.25
41735	H100_DRIL52.268F2_21	Chile16_74_11	9	5901	495	H100_DRIL52.268F2	7	VA	1	26	34	7.5	5.5	6.5
41736	H100_DRIL52.268F2_75	Chile16_72_7	9	5902	549	H100_DRIL52.268F2	7	VA	1	26	33	6.5	5	5.75
41737	H100_DRIL52.268F2_47	Chile16_73_7	9	5903	521	H100_DRIL52.268F2	7	VA	1	26	32	7	5	6
41738	H100_DRIL52.268F2_29	Chile16_76_6	9	5904	503	H100_DRIL52.268F2	7	VA	1	26	31	7	5	6
41739	H100_DRIL52.268F2_2	Chile16_75_2	9	5905	476	H100_DRIL52.268F2	7	VA	1	26	30	7	5.5	6.25
41740	H100_DRIL52.268F2_67	Chile16_71_11	10	5906	541	H100_DRIL52.268F2	7	VA	1	26	29	7	5	6
41741	H100_DRIL52.268F2_33	Chile16_76_10	10	5907	507	H100_DRIL52.268F2	7	VA	1	26	28	7	5	6
41742	H100_DRIL52.268F2_3	Chile16_75_3	10	5908	477	H100_DRIL52.268F2	7	VA	1	26	27	7	5	6
41743	H100_DRIL52.268F2_73	Chile16_72_5	10	5909	547	H100_DRIL52.268F2	7	VA	1	26	26	7	4.5	5.75
41744	H100_DRIL52.268F2_30	Chile16_76_7	10	5910	504	H100_DRIL52.268F2	7	VA	1	26	25	7	4.5	5.75
41745	H100_DRIL52.268F2_43	Chile16_73_3	10	5911	517	H100_DRIL52.268F2	7	VA	1	26	24	7	3.5	5.25
41746	H100_DRIL52.268F2_26	Chile16_76_3	10	5912	500	H100_DRIL52.268F2	7	VA	1	26	23	7	4.5	5.75
41747	H100_DRIL52.268F2_52	Chile16_73_12	10	5913	526	H100_DRIL52.268F2	7	VA	1	26	22	7.5	5	6.25
41748	H100_DRIL52.268F2_74	Chile16_72_6	10	5914	548	H100_DRIL52.268F2	7	VA	1	26	21	7	5	6
41749	DRIL52.268	'	10	5915	963	DRIL52.268	7	VA	1	26	20	7	5.5	6.25
41750	H100_DRIL52.268F2_19	Chile16_74_9	10	5916	493	H100_DRIL52.268F2	7	VA	1	26	19	7	5	6
41751	H100_DRIL52.268F2_6	Chile16_75_6	10	5917	480	H100_DRIL52.268F2	7	VA	1	26	18	7	5	6
41752	H100_DRIL52.268F2_34	Chile16_76_11	10	5918	508	H100_DRIL52.268F2	7	VA	1	26	17	7	5	6
41753	H100_DRIL52.268F2_35	Chile16_76_12	10	5919	509	H100_DRIL52.268F2	7	VA	1	26	16	7	5	6
41754	H100_DRIL52.268F2_41	Chile16_73_1	10	5920	515	H100_DRIL52.268F2	7	VA	1	26	15	7	5.5	6.25
41755	H100_DRIL52.268F2_58	Chile16_71_2	10	5921	532	H100_DRIL52.268F2	7	VA	1	26	14	7	5	6
41756	H100_DRIL52.268F2_9	Chile16_75_9	10	5922	483	H100_DRIL52.268F2	7	VA	1	26	13	7	4	5.5
41757	H100	'	10	5923	970	H100	7	VA	1	26	12	7	4	5.5
41758	H100_DRIL52.268F2_66	Chile16_71_10	10	5924	540	H100_DRIL52.268F2	7	VA	1	26	11	7	4.5	5.75
41759	H100_DRIL52.268F2_77	Chile16_72_9	10	5925	551	H100_DRIL52.268F2	7	VA	1	26	10	7	4.5	5.75
41760	H100_DRIL52.268F2_7	Chile16_75_7	10	5926	481	H100_DRIL52.268F2	7	VA	1	26	9	7	5	6
41762	H100_DRIL52.268F2_15	Chile16_74_5	11	5927	489	H100_DRIL52.268F2	7	VA	1	26	7	7	5.5	6.25
41763	H100_DRIL52.268F2_62	Chile16_71_6	11	5928	536	H100_DRIL52.268F2	7	VA	1	26	6	7.5	6	6.75
41764	H100_DRIL52.268F2_31	Chile16_76_8	11	5929	505	H100_DRIL52.268F2	7	VA	1	26	5	7	4	5.5
41765	H100_DRIL52.268F2_42	Chile16_73_2	11	5930	516	H100_DRIL52.268F2	7	VA	1	26	4	7.5	5	6.25
41766	H100_DRIL52.268F2_36	Chile16_76_13	11	5931	510	H100_DRIL52.268F2	7	VA	1	26	3	7	5	6
41767	H100_DRIL52.268F2_65	Chile16_71_9	11	5932	539	H100_DRIL52.268F2	7	VA	1	26	2	7	5.5	6.25
41768	H100_DRIL52.268F2_1	Chile16_75_1	11	5933	475	H100_DRIL52.268F2	7	VA	1	26	1	6.5	5.5	6
41769	H100_DRIL52.268F2_8	Chile16_75_8	11	5934	482	H100_DRIL52.268F2	7	VA	1	27	1	7	5	6
41770	H100_DRIL52.268F2_22	Chile16_74_12	11	5935	496	H100_DRIL52.268F2	7	VA	1	27	2	7	5	6
41771	H100_DRIL52.268F2_4	Chile16_75_4	11	5936	478	H100_DRIL52.268F2	7	VA	1	27	3	7	4.5	5.75
41772	H100_DRIL52.268F2_69	Chile16_72_1	11	5937	543	H100_DRIL52.268F2	7	VA	1	27	4	7	4	5.5
41773	H100_DRIL52.268F2_48	Chile16_73_8	11	5938	522	H100_DRIL52.268F2	7	VA	1	27	5	7	5	6
41774	H100_DRIL52.268F2_71	Chile16_72_3	11	5939	545	H100_DRIL52.268F2	7	VA	1	27	6	7.5	5.5	6.5
41775	H100_DRIL52.268F2_56	Chile16_73_16	11	5940	530	H100_DRIL52.268F2	7	VA	1	27	7	6.5	4.5	5.5
41776	H100_DRIL52.268F2_16	Chile16_74_6	11	5941	490	H100_DRIL52.268F2	7	VA	1	27	8	7	4.5	5.75
41777	H100_DRIL52.268F2_70	Chile16_72_2	11	5942	544	H100_DRIL52.268F2	7	VA	1	27	9	6.5	4	5.25
41778	H100	'	11	5943	970	H100	7	VA	1	27	10	7	4	5.5
41779	H100_DRIL52.268F2_60	Chile16_71_4	11	5944	534	H100_DRIL52.268F2	7	VA	1	27	11	7	.	7
41780	H100_DRIL52.268F2_14	Chile16_74_4	11	5945	488	H100_DRIL52.268F2	7	VA	1	27	12	7	4.5	5.75
41781	H100_DRIL52.268F2_76	Chile16_72_8	11	5946	550	H100_DRIL52.268F2	7	VA	1	27	13	7	4	5.5
41782	H100_DRIL52.268F2_44	Chile16_73_4	11	5947	518	H100_DRIL52.268F2	7	VA	1	27	14	5	3.5	4.25
41783	H100_DRIL52.268F2_38	Chile16_76_15	12	5948	512	H100_DRIL52.268F2	7	VA	1	27	15	7.5	4.5	6
41784	H100_DRIL52.268F2_24	Chile16_76_1	12	5949	498	H100_DRIL52.268F2	7	VA	1	27	16	7	4.5	5.75
41785	H100_DRIL52.268F2_27	Chile16_76_4	12	5950	501	H100_DRIL52.268F2	7	VA	1	27	17	7	5.5	6.25
41786	H100_DRIL52.268F2_39	Chile16_76_16	12	5951	513	H100_DRIL52.268F2	7	VA	1	27	18	7.5	5.5	6.5
41787	H100_DRIL52.268F2_25	Chile16_76_2	12	5952	499	H100_DRIL52.268F2	7	VA	1	27	19	7	5	6
41788	H100_DRIL52.268F2_55	Chile16_73_15	12	5953	529	H100_DRIL52.268F2	7	VA	1	27	20	7	5	6
41789	H100_DRIL52.268F2_37	Chile16_76_14	12	5954	511	H100_DRIL52.268F2	7	VA	1	27	21	6.5	4	5.25
41790	H100_DRIL52.268F2_64	Chile16_71_8	12	5955	538	H100_DRIL52.268F2	7	VA	1	27	22	7	4	5.5
41791	H100_DRIL52.268F2_46	Chile16_73_6	12	5956	520	H100_DRIL52.268F2	7	VA	1	27	23	6.5	4	5.25
41792	H100_DRIL52.268F2_51	Chile16_73_11	12	5957	525	H100_DRIL52.268F2	7	VA	1	27	24	7	4	5.5
41793	H100_DRIL52.268F2_53	Chile16_73_13	12	5958	527	H100_DRIL52.268F2	7	VA	1	27	25	7	4	5.5
41794	H100_DRIL52.268F2_72	Chile16_72_4	12	5959	546	H100_DRIL52.268F2	7	VA	1	27	26	7	4.5	5.75
41795	H100_DRIL72.232F2_38	Chile16_121_1	12	5960	931	H100_DRIL72.232F2	13	VA	1	27	27	7	4.5	5.75
41796	H100	'	12	5961	970	H100	13	VA	1	27	28	7	4	5.5
41797	H100_DRIL72.232F2_4	Chile16_123_4	12	5962	897	H100_DRIL72.232F2	13	VA	1	27	29	7	4	5.5
41798	H100_DRIL72.232F2_2	Chile16_123_2	12	5963	895	H100_DRIL72.232F2	13	VA	1	27	30	6.5	4	5.25
41799	H100_DRIL72.232F2_47	Chile16_121_10	12	5964	940	H100_DRIL72.232F2	13	VA	1	27	31	6	4.5	5.25
41800	H100_DRIL72.232F2_31	Chile16_120_5	12	5965	924	H100_DRIL72.232F2	13	VA	1	27	32	6.5	4	5.25
41801	H100_DRIL72.232F2_13	Chile16_118_4	12	5966	906	H100_DRIL72.232F2	13	VA	1	27	33	7	4.5	5.75
41802	H100_DRIL72.232F2_46	Chile16_121_9	12	5967	939	H100_DRIL72.232F2	13	VA	1	27	34	7	4.5	5.75
41803	H100_DRIL72.232F2_55	Chile16_122_7	12	5968	948	H100_DRIL72.232F2	13	VA	1	27	35	7	5	6
41804	H100_DRIL72.232F2_40	Chile16_121_3	13	5969	933	H100_DRIL72.232F2	13	VA	1	27	36	6.5	4	5.25
41805	H100_DRIL72.232F2_33	Chile16_120_7	13	5970	926	H100_DRIL72.232F2	13	VA	1	27	37	7	.	7
41806	H100_DRIL72.232F2_21	Chile16_119_2	13	5971	914	H100_DRIL72.232F2	13	VA	1	27	38	7	5	6
41808	H100_DRIL72.232F2_12	Chile16_118_3	13	5973	905	H100_DRIL72.232F2	13	VA	1	27	40	6.5	3.5	5
41809	H100_DRIL72.232F2_41	Chile16_121_4	13	5974	934	H100_DRIL72.232F2	13	VA	1	27	41	7	5	6
41810	H100_DRIL72.232F2_45	Chile16_121_8	13	5975	938	H100_DRIL72.232F2	13	VA	1	27	42	7	4	5.5
41811	H100_DRIL72.232F2_7	Chile16_123_7	13	5976	900	H100_DRIL72.232F2	13	VA	1	27	43	7.5	5	6.25
41812	H100_DRIL72.232F2_57	Chile16_122_9	13	5977	950	H100_DRIL72.232F2	13	VA	1	27	44	7.5	4.5	6
41813	H100_DRIL72.232F2_42	Chile16_121_5	13	5978	935	H100_DRIL72.232F2	13	VA	1	27	45	7	4.5	5.75
41815	H100_DRIL72.232F2_61	Chile16_122_13	13	5980	954	H100_DRIL72.232F2	13	VA	1	27	47	7	5	6
41816	H100	'	13	5981	970	H100	13	VA	1	27	48	7	4	5.5
41818	H100_DRIL72.232F2_36	Chile16_120_10	13	5983	929	H100_DRIL72.232F2	13	VA	1	27	50	7	4	5.5
41819	H100_DRIL72.232F2_24	Chile16_119_5	13	5984	917	H100_DRIL72.232F2	13	VA	1	27	51	6.5	4	5.25
41820	H100_DRIL72.232F2_20	Chile16_119_1	13	5985	913	H100_DRIL72.232F2	13	VA	1	27	52	7	4.5	5.75
41821	H100_DRIL72.232F2_35	Chile16_120_9	13	5986	928	H100_DRIL72.232F2	13	VA	1	27	53	7	4.5	5.75
41822	H100_DRIL72.232F2_14	Chile16_118_5	13	5987	907	H100_DRIL72.232F2	13	VA	1	27	54	7	4.5	5.75
41825	H100_DRIL72.232F2_60	Chile16_122_12	14	5990	953	H100_DRIL72.232F2	13	VA	1	27	57	7	4	5.5
41826	DRIL72.232	'	14	5991	969	DRIL72.232	13	VA	1	27	58	7	5	6
41827	H100	'	14	5992	970	H100	13	VA	1	27	59	7	4	5.5
41829	H100_DRIL72.232F2_6	Chile16_123_6	14	5994	899	H100_DRIL72.232F2	13	VA	1	27	61	7	5	6
41830	H100_DRIL72.232F2_27	Chile16_120_1	14	5995	920	H100_DRIL72.232F2	13	VA	1	27	62	6.5	5	5.75
41831	H100_DRIL72.232F2_16	Chile16_118_7	14	5996	909	H100_DRIL72.232F2	13	VA	1	27	63	7.5	5	6.25
41832	H100_DRIL72.232F2_29	Chile16_120_3	14	5997	922	H100_DRIL72.232F2	13	VA	1	27	64	7	4	5.5
41833	H100_DRIL72.232F2_43	Chile16_121_6	14	5998	936	H100_DRIL72.232F2	13	VA	1	27	65	7	5	6
41834	H100_DRIL72.232F2_5	Chile16_123_5	14	5999	898	H100_DRIL72.232F2	13	VA	1	27	66	7	4.5	5.75
41835	H100_DRIL72.232F2_22	Chile16_119_3	14	6000	915	H100_DRIL72.232F2	13	VA	1	27	67	7	4.5	5.75
41836	H100_DRIL72.232F2_11	Chile16_118_2	14	6001	904	H100_DRIL72.232F2	13	VA	1	27	68	7	5.5	6.25
41837	H100_DRIL72.232F2_52	Chile16_122_4	14	6002	945	H100_DRIL72.232F2	13	VA	1	28	68	7	5	6
41838	H100_DRIL72.232F2_30	Chile16_120_4	14	6003	923	H100_DRIL72.232F2	13	VA	1	28	67	6.5	4.5	5.5
41839	H100_DRIL72.232F2_49	Chile16_122_1	14	6004	942	H100_DRIL72.232F2	13	VA	1	28	66	6	3	4.5
41840	H100_DRIL72.232F2_51	Chile16_122_3	14	6005	944	H100_DRIL72.232F2	13	VA	1	28	65	6.5	4	5.25
41841	H100_DRIL72.232F2_53	Chile16_122_5	14	6006	946	H100_DRIL72.232F2	13	VA	1	28	64	6.5	3	4.75
41842	H100_DRIL72.232F2_56	Chile16_122_8	14	6007	949	H100_DRIL72.232F2	13	VA	1	28	63	6.5	5	5.75
41843	H100_DRIL72.232F2_10	Chile16_118_1	14	6008	903	H100_DRIL72.232F2	13	VA	1	28	62	7	4	5.5
41844	H100_DRIL72.232F2_1	Chile16_123_1	14	6009	894	H100_DRIL72.232F2	13	VA	1	28	61	7	4	5.5
41845	H100_DRIL72.232F2_50	Chile16_122_2	14	6010	943	H100_DRIL72.232F2	13	VA	1	28	60	7	4	5.5
41846	H100_DRIL72.232F2_28	Chile16_120_2	15	6011	921	H100_DRIL72.232F2	13	VA	1	28	59	6.5	4.5	5.5
41847	H100_DRIL72.232F2_37	Chile16_120_11	15	6012	930	H100_DRIL72.232F2	13	VA	1	28	58	7	4	5.5
41848	H100_DRIL72.232F2_18	Chile16_118_9	15	6013	911	H100_DRIL72.232F2	13	VA	1	28	57	7	.	7
41850	H100_DRIL72.232F2_58	Chile16_122_10	15	6015	951	H100_DRIL72.232F2	13	VA	1	28	55	7	.	7
41851	H100_DRIL72.232F2_17	Chile16_118_8	15	6016	910	H100_DRIL72.232F2	13	VA	1	28	54	7	4	5.5
41852	H100_DRIL72.232F2_34	Chile16_120_8	15	6017	927	H100_DRIL72.232F2	13	VA	1	28	53	7	4.5	5.75
41853	H100_DRIL72.232F2_48	Chile16_121_11	15	6018	941	H100_DRIL72.232F2	13	VA	1	28	52	7	4.5	5.75
41854	H100_DRIL72.232F2_3	Chile16_123_3	15	6019	896	H100_DRIL72.232F2	13	VA	1	28	51	7	4	5.5
41855	H100_DRIL72.232F2_59	Chile16_122_11	15	6020	952	H100_DRIL72.232F2	13	VA	1	28	50	7	4	5.5
41856	H100_DRIL72.232F2_26	Chile16_119_7	15	6021	919	H100_DRIL72.232F2	13	VA	1	28	49	7	4	5.5
41857	H100_DRIL72.232F2_54	Chile16_122_6	15	6022	947	H100_DRIL72.232F2	13	VA	1	28	48	7	4	5.5
41858	H100_DRIL72.232F2_19	Chile16_118_10	15	6023	912	H100_DRIL72.232F2	13	VA	1	28	47	7	4	5.5
41859	H100_DRIL72.232F2_44	Chile16_121_7	15	6024	937	H100_DRIL72.232F2	13	VA	1	28	46	7	4.5	5.75
41860	H100_DRIL72.232F2_39	Chile16_121_2	15	6025	932	H100_DRIL72.232F2	13	VA	1	28	45	7.5	4.5	6
41862	H100_DRIL72.061F2_72	Chile16_117_5	15	6027	886	H100_DRIL72.061F2	12	VA	1	28	43	7.5	4.5	6
41863	H100	'	15	6028	970	H100	12	VA	1	28	42	7	4	5.5
41864	H100_DRIL72.061F2_48	Chile16_115_13	15	6029	862	H100_DRIL72.061F2	12	VA	1	28	41	7.5	5.5	6.5
41865	H100_DRIL72.061F2_47	Chile16_115_12	15	6030	861	H100_DRIL72.061F2	12	VA	1	28	40	7	5	6
41866	H100_DRIL72.061F2_37	Chile16_115_2	15	6031	851	H100_DRIL72.061F2	12	VA	1	28	39	7	4.5	5.75
41868	H100	'	16	6032	970	H100	12	VA	1	28	37	7	4	5.5
41869	H100_DRIL72.061F2_73	Chile16_117_6	16	6033	887	H100_DRIL72.061F2	12	VA	1	28	36	7	4.5	5.75
41870	H100_DRIL72.061F2_64	Chile16_116_11	16	6034	878	H100_DRIL72.061F2	12	VA	1	28	35	7.5	5.5	6.5
41871	H100_DRIL72.061F2_54	Chile16_116_1	16	6035	868	H100_DRIL72.061F2	12	VA	1	28	34	7.5	5.5	6.5
41872	H100_DRIL72.061F2_70	Chile16_117_3	16	6036	884	H100_DRIL72.061F2	12	VA	1	28	33	7	5.5	6.25
41873	H100_DRIL72.061F2_40	Chile16_115_5	16	6037	854	H100_DRIL72.061F2	12	VA	1	28	32	7	4.5	5.75
41874	H100_DRIL72.061F2_12	Chile16_112_1	16	6038	826	H100_DRIL72.061F2	12	VA	1	28	31	7	5	6
41875	H100_DRIL72.061F2_18	Chile16_112_7	16	6039	832	H100_DRIL72.061F2	12	VA	1	28	30	7	5	6
41876	H100_DRIL72.061F2_25	Chile16_113_2	16	6040	839	H100_DRIL72.061F2	12	VA	1	28	29	7	4	5.5
41877	H100_DRIL72.061F2_39	Chile16_115_4	16	6041	853	H100_DRIL72.061F2	12	VA	1	28	28	7.5	5	6.25
41878	H100_DRIL72.061F2_61	Chile16_116_8	16	6042	875	H100_DRIL72.061F2	12	VA	1	28	27	7	5	6
41879	H100_DRIL72.061F2_62	Chile16_116_9	16	6043	876	H100_DRIL72.061F2	12	VA	1	28	26	7	5	6
41880	H100_DRIL72.061F2_56	Chile16_116_3	16	6044	870	H100_DRIL72.061F2	12	VA	1	28	25	7	5.5	6.25
41881	H100_DRIL72.061F2_60	Chile16_116_7	16	6045	874	H100_DRIL72.061F2	12	VA	1	28	24	7.5	6	6.75
41882	H100_DRIL72.061F2_38	Chile16_115_3	16	6046	852	H100_DRIL72.061F2	12	VA	1	28	23	7.5	5.5	6.5
41883	H100_DRIL72.061F2_19	Chile16_112_8	16	6047	833	H100_DRIL72.061F2	12	VA	1	28	22	7	5	6
41884	H100_DRIL72.061F2_52	Chile16_115_17	16	6048	866	H100_DRIL72.061F2	12	VA	1	28	21	7	4.5	5.75
41885	H100_DRIL72.061F2_10	Chile16_114_10	16	6049	824	H100_DRIL72.061F2	12	VA	1	28	20	7	5	6
41886	H100_DRIL72.061F2_21	Chile16_112_10	16	6050	835	H100_DRIL72.061F2	12	VA	1	28	19	7	5	6
41887	H100_DRIL72.061F2_15	Chile16_112_4	16	6051	829	H100_DRIL72.061F2	12	VA	1	28	18	7	5.5	6.25
41888	H100_DRIL72.061F2_50	Chile16_115_15	16	6052	864	H100_DRIL72.061F2	12	VA	1	28	17	7	5	6
41889	H100_DRIL72.061F2_49	Chile16_115_14	17	6053	863	H100_DRIL72.061F2	12	VA	1	28	16	7.5	5.5	6.5
41890	H100_DRIL72.061F2_5	Chile16_114_5	17	6054	819	H100_DRIL72.061F2	12	VA	1	28	15	7	5	6
41892	H100_DRIL72.061F2_26	Chile16_113_3	17	6056	840	H100_DRIL72.061F2	12	VA	1	28	13	7	5.5	6.25
41893	H100_DRIL72.061F2_6	Chile16_114_6	17	6057	820	H100_DRIL72.061F2	12	VA	1	28	12	7	5	6
41894	H100_DRIL72.061F2_58	Chile16_116_5	17	6058	872	H100_DRIL72.061F2	12	VA	1	28	11	7	4	5.5
41895	H100_DRIL72.061F2_51	Chile16_115_16	17	6059	865	H100_DRIL72.061F2	12	VA	1	28	10	7.5	5.5	6.5
41896	H100_DRIL72.061F2_32	Chile16_113_9	17	6060	846	H100_DRIL72.061F2	12	VA	1	28	9	7.5	5	6.25
41897	H100_DRIL72.061F2_28	Chile16_113_5	17	6061	842	H100_DRIL72.061F2	12	VA	1	28	8	7	4	5.5
41898	H100_DRIL72.061F2_33	Chile16_113_10	17	6062	847	H100_DRIL72.061F2	12	VA	1	28	7	7	4.5	5.75
41899	H100_DRIL72.061F2_71	Chile16_117_4	17	6063	885	H100_DRIL72.061F2	12	VA	1	28	6	7	4.5	5.75
41900	H100_DRIL72.061F2_57	Chile16_116_4	17	6064	871	H100_DRIL72.061F2	12	VA	1	28	5	7	4.5	5.75
41901	H100_DRIL72.061F2_13	Chile16_112_2	17	6065	827	H100_DRIL72.061F2	12	VA	1	28	4	7.5	6	6.75
41902	H100_DRIL72.061F2_74	Chile16_117_7	17	6066	888	H100_DRIL72.061F2	12	VA	1	28	3	7.5	5.5	6.5
41903	H100_DRIL72.061F2_29	Chile16_113_6	17	6067	843	H100_DRIL72.061F2	12	VA	1	28	2	7	5.5	6.25
41904	H100_DRIL72.061F2_55	Chile16_116_2	17	6068	869	H100_DRIL72.061F2	12	VA	1	28	1	7	5	6
41905	H100_DRIL72.061F2_24	Chile16_113_1	17	6069	838	H100_DRIL72.061F2	12	VA	1	29	1	7.5	5.5	6.5
41906	H100_DRIL72.061F2_1	Chile16_114_1	17	6070	815	H100_DRIL72.061F2	12	VA	1	29	2	7.5	5.5	6.5
41907	H100_DRIL72.061F2_4	Chile16_114_4	17	6071	818	H100_DRIL72.061F2	12	VA	1	29	3	7.5	6	6.75
41908	H100_DRIL72.061F2_68	Chile16_117_1	17	6072	882	H100_DRIL72.061F2	12	VA	1	29	4	7	6	6.5
41909	H100	'	17	6073	970	H100	12	VA	1	29	5	7	4	5.5
41910	H100_DRIL72.061F2_34	Chile16_113_11	18	6074	848	H100_DRIL72.061F2	12	VA	1	29	6	7	5	6
41911	H100_DRIL72.061F2_43	Chile16_115_8	18	6075	857	H100_DRIL72.061F2	12	VA	1	29	7	7.5	5	6.25
41912	H100_DRIL72.061F2_66	Chile16_116_13	18	6076	880	H100_DRIL72.061F2	12	VA	1	29	8	7	5	6
41913	H100_DRIL72.061F2_20	Chile16_112_9	18	6077	834	H100_DRIL72.061F2	12	VA	1	29	9	7.5	5	6.25
41914	H100_DRIL72.061F2_45	Chile16_115_10	18	6078	859	H100_DRIL72.061F2	12	VA	1	29	10	7	4.5	5.75
41915	H100_DRIL72.061F2_65	Chile16_116_12	18	6079	879	H100_DRIL72.061F2	12	VA	1	29	11	7	4.5	5.75
41916	H100_DRIL72.061F2_11	Chile16_114_11	18	6080	825	H100_DRIL72.061F2	12	VA	1	29	12	7	5.5	6.25
41917	H100_DRIL72.061F2_41	Chile16_115_6	18	6081	855	H100_DRIL72.061F2	12	VA	1	29	13	7	5	6
41918	H100	'	18	6082	970	H100	12	VA	1	29	14	7	3.5	5.25
41919	H100_DRIL72.061F2_69	Chile16_117_2	18	6083	883	H100_DRIL72.061F2	12	VA	1	29	15	7.5	6	6.75
41920	H100_DRIL72.061F2_79	Chile16_117_12	18	6084	893	H100_DRIL72.061F2	12	VA	1	29	16	7	5.5	6.25
41921	H100_DRIL72.061F2_78	Chile16_117_11	18	6085	892	H100_DRIL72.061F2	12	VA	1	29	17	7.5	5.5	6.5
41922	DRIL72.061	'	18	6086	968	DRIL72.061	12	VA	1	29	18	7	.	7
41923	H100_DRIL72.061F2_23	Chile16_112_12	18	6087	837	H100_DRIL72.061F2	12	VA	1	29	19	7	5	6
41924	H100_DRIL72.061F2_63	Chile16_116_10	18	6088	877	H100_DRIL72.061F2	12	VA	1	29	20	7	5.5	6.25
41925	H100_DRIL72.061F2_22	Chile16_112_11	18	6089	836	H100_DRIL72.061F2	12	VA	1	29	21	7	5.5	6.25
41926	H100_DRIL72.061F2_76	Chile16_117_9	18	6090	890	H100_DRIL72.061F2	12	VA	1	29	22	7.5	5.5	6.5
41927	H100_DRIL72.061F2_16	Chile16_112_5	18	6091	830	H100_DRIL72.061F2	12	VA	1	29	23	7.5	6	6.75
41928	H100_DRIL72.061F2_30	Chile16_113_7	18	6092	844	H100_DRIL72.061F2	12	VA	1	29	24	7.5	5.5	6.5
41929	H100_DRIL72.061F2_7	Chile16_114_7	18	6093	821	H100_DRIL72.061F2	12	VA	1	29	25	7	5.5	6.25
41930	H100_DRIL72.061F2_31	Chile16_113_8	18	6094	845	H100_DRIL72.061F2	12	VA	1	29	26	7	4.5	5.75
41931	H100_DRIL72.061F2_44	Chile16_115_9	19	6095	858	H100_DRIL72.061F2	12	VA	1	29	27	7	4.5	5.75
41932	H100_DRIL72.061F2_42	Chile16_115_7	19	6096	856	H100_DRIL72.061F2	12	VA	1	29	28	7	5.5	6.25
41933	H100_DRIL72.061F2_14	Chile16_112_3	19	6097	828	H100_DRIL72.061F2	12	VA	1	29	29	7.5	5	6.25
41934	H100_DRIL72.061F2_35	Chile16_113_12	19	6098	849	H100_DRIL72.061F2	12	VA	1	29	30	7	5	6
41935	H100_DRIL72.061F2_67	Chile16_116_14	19	6099	881	H100_DRIL72.061F2	12	VA	1	29	31	7	5.5	6.25
41936	H100_DRIL72.061F2_75	Chile16_117_8	19	6100	889	H100_DRIL72.061F2	12	VA	1	29	32	7.5	5	6.25
41937	H100_DRIL72.061F2_53	Chile16_115_18	19	6101	867	H100_DRIL72.061F2	12	VA	1	29	33	7	5.5	6.25
41938	H100_DRIL72.061F2_3	Chile16_114_3	19	6102	817	H100_DRIL72.061F2	12	VA	1	29	34	7.5	5.5	6.5
41939	H100_DRIL72.061F2_46	Chile16_115_11	19	6103	860	H100_DRIL72.061F2	12	VA	1	29	35	7	4	5.5
41940	H100_DRIL72.061F2_2	Chile16_114_2	19	6104	816	H100_DRIL72.061F2	12	VA	1	29	36	7	4	5.5
41941	H100_DRIL72.061F2_8	Chile16_114_8	19	6105	822	H100_DRIL72.061F2	12	VA	1	29	37	7	4	5.5
41942	H100_DRIL72.061F2_9	Chile16_114_9	19	6106	823	H100_DRIL72.061F2	12	VA	1	29	38	7.5	6	6.75
41943	H100_DRIL72.061F2_17	Chile16_112_6	19	6107	831	H100_DRIL72.061F2	12	VA	1	29	39	7	4	5.5
41944	H100_DRIL72.061F2_59	Chile16_116_6	19	6108	873	H100_DRIL72.061F2	12	VA	1	29	40	7	4.5	5.75
41945	H100_DRIL72.061F2_36	Chile16_115_1	19	6109	850	H100_DRIL72.061F2	12	VA	1	29	41	7	6	6.5
41946	H100_DRIL72.061F2_77	Chile16_117_10	19	6110	891	H100_DRIL72.061F2	12	VA	1	29	42	7	4	5.5
41947	H100_DRIL32.090F2_9	Chile16_24_9	19	6111	9	H100_DRIL32.090F2	1	VA	1	29	43	7	5	6
41948	H100	'	19	6112	970	H100	1	VA	1	29	44	7	4	5.5
41949	H100_DRIL32.090F2_11	Chile16_24_11	19	6113	11	H100_DRIL32.090F2	1	VA	1	29	45	7	4.5	5.75
41950	H100_DRIL32.090F2_43	Chile16_27_3	19	6114	43	H100_DRIL32.090F2	1	VA	1	29	46	7	4.5	5.75
41951	H100_DRIL32.090F2_62	Chile16_23_4	19	6115	62	H100_DRIL32.090F2	1	VA	1	29	47	7	5	6
41952	H100_DRIL32.090F2_30	Chile16_26_16	20	6116	30	H100_DRIL32.090F2	1	VA	1	29	48	7	4.5	5.75
41953	H100	'	20	6117	970	H100	1	VA	1	29	49	7	3.5	5.25
41954	H100_DRIL32.090F2_4	Chile16_24_4	20	6118	4	H100_DRIL32.090F2	1	VA	1	29	50	7	5	6
41955	H100	'	20	6119	970	H100	1	VA	1	29	51	7	3.5	5.25
41956	H100_DRIL32.090F2_41	Chile16_27_1	20	6120	41	H100_DRIL32.090F2	1	VA	1	29	52	7.5	4	5.75
41957	H100_DRIL32.090F2_52	Chile16_28_1	20	6121	52	H100_DRIL32.090F2	1	VA	1	29	53	7.5	5	6.25
41958	H100_DRIL32.090F2_64	Chile16_23_6	20	6122	64	H100_DRIL32.090F2	1	VA	1	29	54	7	4	5.5
41959	H100_DRIL32.090F2_32	Chile16_25_2	20	6123	32	H100_DRIL32.090F2	1	VA	1	29	55	7.5	5.5	6.5
41960	H100_DRIL32.090F2_2	Chile16_24_2	20	6124	2	H100_DRIL32.090F2	1	VA	1	29	56	7	5	6
41961	H100_DRIL32.090F2_48	Chile16_27_8	20	6125	48	H100_DRIL32.090F2	1	VA	1	29	57	7	5	6
41962	H100_DRIL32.090F2_25	Chile16_26_11	20	6126	25	H100_DRIL32.090F2	1	VA	1	29	58	7	5	6
41963	H100_DRIL32.090F2_31	Chile16_25_1	20	6127	31	H100_DRIL32.090F2	1	VA	1	29	59	7	4.5	5.75
41964	H100_DRIL32.090F2_10	Chile16_24_10	20	6128	10	H100_DRIL32.090F2	1	VA	1	29	60	7	4.5	5.75
41965	H100_DRIL32.090F2_20	Chile16_26_6	20	6129	20	H100_DRIL32.090F2	1	VA	1	29	61	7	4.5	5.75
41966	H100_DRIL32.090F2_56	Chile16_28_5	20	6130	56	H100_DRIL32.090F2	1	VA	1	29	62	7	4.5	5.75
41967	H100_DRIL32.090F2_14	Chile16_24_14	20	6131	14	H100_DRIL32.090F2	1	VA	1	29	63	7	4.5	5.75
41968	H100_DRIL32.090F2_29	Chile16_26_15	20	6132	29	H100_DRIL32.090F2	1	VA	1	29	64	7	3	5
41969	H100_DRIL32.090F2_17	Chile16_26_3	20	6133	17	H100_DRIL32.090F2	1	VA	1	29	65	7.5	3.5	5.5
41970	H100_DRIL32.090F2_61	Chile16_23_3	20	6134	61	H100_DRIL32.090F2	1	VA	1	29	66	7	4	5.5
41971	H100_DRIL32.090F2_58	Chile16_28_7	20	6135	58	H100_DRIL32.090F2	1	VA	1	29	67	7	5	6
41972	H100_DRIL32.090F2_39	Chile16_25_9	20	6136	39	H100_DRIL32.090F2	1	VA	1	29	68	7	5	6
41974	H100_DRIL32.090F2_37	Chile16_25_7	21	6137	37	H100_DRIL32.090F2	1	VA	1	30	67	7	5	6
41975	H100_DRIL32.090F2_33	Chile16_25_3	21	6138	33	H100_DRIL32.090F2	1	VA	1	30	66	6.5	5	5.75
41976	H100_DRIL32.090F2_16	Chile16_26_2	21	6139	16	H100_DRIL32.090F2	1	VA	1	30	65	7	3.5	5.25
41977	H100_DRIL32.090F2_68	Chile16_23_10	21	6140	68	H100_DRIL32.090F2	1	VA	1	30	64	7	4	5.5
41978	H100_DRIL32.090F2_51	Chile16_27_11	21	6141	51	H100_DRIL32.090F2	1	VA	1	30	63	7.5	5	6.25
41979	H100_DRIL32.090F2_65	Chile16_23_7	21	6142	65	H100_DRIL32.090F2	1	VA	1	30	62	7	5	6
41980	H100_DRIL32.090F2_18	Chile16_26_4	21	6143	18	H100_DRIL32.090F2	1	VA	1	30	61	7	5	6
41981	H100_DRIL32.090F2_49	Chile16_27_9	21	6144	49	H100_DRIL32.090F2	1	VA	1	30	60	7	5	6
41982	H100_DRIL32.090F2_54	Chile16_28_3	21	6145	54	H100_DRIL32.090F2	1	VA	1	30	59	7.5	5	6.25
41983	H100_DRIL32.090F2_63	Chile16_23_5	21	6146	63	H100_DRIL32.090F2	1	VA	1	30	58	7.5	5.5	6.5
41984	H100_DRIL32.090F2_13	Chile16_24_13	21	6147	13	H100_DRIL32.090F2	1	VA	1	30	57	7	5	6
41985	H100_DRIL32.090F2_28	Chile16_26_14	21	6148	28	H100_DRIL32.090F2	1	VA	1	30	56	7	4	5.5
41986	H100_DRIL32.090F2_6	Chile16_24_6	21	6149	6	H100_DRIL32.090F2	1	VA	1	30	55	7	3.5	5.25
41987	H100_DRIL32.090F2_46	Chile16_27_6	21	6150	46	H100_DRIL32.090F2	1	VA	1	30	54	7.5	6	6.75
41988	H100_DRIL32.090F2_55	Chile16_28_4	21	6151	55	H100_DRIL32.090F2	1	VA	1	30	53	7	4	5.5
41989	H100_DRIL32.090F2_1	Chile16_24_1	21	6152	1	H100_DRIL32.090F2	1	VA	1	30	52	7	4	5.5
41990	H100_DRIL32.090F2_27	Chile16_26_13	21	6153	27	H100_DRIL32.090F2	1	VA	1	30	51	7	4.5	5.75
41991	H100_DRIL32.090F2_45	Chile16_27_5	21	6154	45	H100_DRIL32.090F2	1	VA	1	30	50	7	4	5.5
41992	H100	'	21	6155	970	H100	1	VA	1	30	49	7	4	5.5
41993	H100_DRIL32.090F2_59	Chile16_23_1	21	6156	59	H100_DRIL32.090F2	1	VA	1	30	48	7.5	4.5	6
41994	H100_DRIL32.090F2_19	Chile16_26_5	21	6157	19	H100_DRIL32.090F2	1	VA	1	30	47	7	4.5	5.75
41995	H100_DRIL32.090F2_22	Chile16_26_8	22	6158	22	H100_DRIL32.090F2	1	VA	1	30	46	7	5	6
41996	H100_DRIL32.090F2_38	Chile16_25_8	22	6159	38	H100_DRIL32.090F2	1	VA	1	30	45	7	4	5.5
41999	H100_DRIL32.090F2_3	Chile16_24_3	22	6162	3	H100_DRIL32.090F2	1	VA	1	30	42	7	4.5	5.75
42000	H100_DRIL32.090F2_15	Chile16_26_1	22	6163	15	H100_DRIL32.090F2	1	VA	1	30	41	7	5	6
42001	H100_DRIL32.090F2_40	Chile16_25_10	22	6164	40	H100_DRIL32.090F2	1	VA	1	30	40	7.5	5.5	6.5
42002	H100_DRIL32.090F2_36	Chile16_25_6	22	6165	36	H100_DRIL32.090F2	1	VA	1	30	39	7.5	5	6.25
42003	H100_DRIL32.090F2_35	Chile16_25_5	22	6166	35	H100_DRIL32.090F2	1	VA	1	30	38	7	5.5	6.25
42004	H100_DRIL32.090F2_24	Chile16_26_10	22	6167	24	H100_DRIL32.090F2	1	VA	1	30	37	7	5	6
42005	H100_DRIL32.090F2_26	Chile16_26_12	22	6168	26	H100_DRIL32.090F2	1	VA	1	30	36	7	4	5.5
42006	H100_DRIL32.090F2_60	Chile16_23_2	22	6169	60	H100_DRIL32.090F2	1	VA	1	30	35	7	5.5	6.25
42007	H100_DRIL32.090F2_8	Chile16_24_8	22	6170	8	H100_DRIL32.090F2	1	VA	1	30	34	7	4.5	5.75
42008	H100_DRIL32.090F2_34	Chile16_25_4	22	6171	34	H100_DRIL32.090F2	1	VA	1	30	33	7	4.5	5.75
42009	H100_DRIL32.090F2_5	Chile16_24_5	22	6172	5	H100_DRIL32.090F2	1	VA	1	30	32	7	4.5	5.75
42010	H100_DRIL32.090F2_47	Chile16_27_7	22	6173	47	H100_DRIL32.090F2	1	VA	1	30	31	7	4.5	5.75
42011	H100_DRIL32.090F2_69	Chile16_23_11	22	6174	69	H100_DRIL32.090F2	1	VA	1	30	30	7	3.5	5.25
42012	H100	'	22	6175	970	H100	1	VA	1	30	29	6.5	3	4.75
42013	H100_DRIL32.090F2_44	Chile16_27_4	22	6176	44	H100_DRIL32.090F2	1	VA	1	30	28	7.5	4	5.75
42014	H100_DRIL32.090F2_50	Chile16_27_10	22	6177	50	H100_DRIL32.090F2	1	VA	1	30	27	7	5	6
42015	H100_DRIL32.090F2_21	Chile16_26_7	22	6178	21	H100_DRIL32.090F2	1	VA	1	30	26	7	4.5	5.75
42016	H100_DRIL32.090F2_67	Chile16_23_9	23	6179	67	H100_DRIL32.090F2	1	VA	1	30	25	7	5	6
42017	H100_DRIL32.090F2_70	Chile16_23_12	23	6180	70	H100_DRIL32.090F2	1	VA	1	30	24	7	4.5	5.75
42018	H100_DRIL32.090F2_66	Chile16_23_8	23	6181	66	H100_DRIL32.090F2	1	VA	1	30	23	7.5	5	6.25
42019	DRIL32.090	'	23	6182	957	DRIL32.090	1	VA	1	30	22	7	5.5	6.25
42020	H100_DRIL32.090F2_23	Chile16_26_9	23	6183	23	H100_DRIL32.090F2	1	VA	1	30	21	7	4.5	5.75
42021	H100_DRIL32.090F2_53	Chile16_28_2	23	6184	53	H100_DRIL32.090F2	1	VA	1	30	20	7	6	6.5
42022	H100_DRIL32.090F2_42	Chile16_27_2	23	6185	42	H100_DRIL32.090F2	1	VA	1	30	19	7.5	5.5	6.5
42023	H100_DRIL32.090F2_7	Chile16_24_7	23	6186	7	H100_DRIL32.090F2	1	VA	1	30	18	7	4	5.5
42024	H100_DRIL32.191F2_13	Chile16_51_1	23	6187	232	H100_DRIL32.191F2	4	VA	1	30	17	7.5	5	6.25
42025	H100	'	23	6188	970	H100	4	VA	1	30	16	7	3.5	5.25
42026	H100_DRIL32.191F2_57	Chile16_50_13	23	6189	276	H100_DRIL32.191F2	4	VA	1	30	15	7.5	4	5.75
42027	H100_DRIL32.191F2_56	Chile16_50_12	23	6190	275	H100_DRIL32.191F2	4	VA	1	30	14	6	4.5	5.25
42028	H100_DRIL32.191F2_24	Chile16_51_12	23	6191	243	H100_DRIL32.191F2	4	VA	1	30	13	7.5	4	5.75
42029	H100_DRIL32.191F2_83	Chile16_52_9	23	6192	302	H100_DRIL32.191F2	4	VA	1	30	12	7	4.5	5.75
42030	H100_DRIL32.191F2_40	Chile16_49_13	23	6193	259	H100_DRIL32.191F2	4	VA	1	30	11	7	4	5.5
42031	H100_DRIL32.191F2_21	Chile16_51_9	23	6194	240	H100_DRIL32.191F2	4	VA	1	30	10	7	5	6
42032	H100_DRIL32.191F2_25	Chile16_51_13	23	6195	244	H100_DRIL32.191F2	4	VA	1	30	9	7	4	5.5
42033	H100_DRIL32.191F2_68	Chile16_47_11	23	6196	287	H100_DRIL32.191F2	4	VA	1	30	8	7	4	5.5
42034	H100_DRIL32.191F2_84	Chile16_52_10	23	6197	303	H100_DRIL32.191F2	4	VA	1	30	7	7	5	6
42035	H100	'	23	6198	970	H100	4	VA	1	30	6	6.5	3.5	5
42036	H100_DRIL32.191F2_27	Chile16_51_15	23	6199	246	H100_DRIL32.191F2	4	VA	1	30	5	7	3.5	5.25
42037	H100_DRIL32.191F2_70	Chile16_47_13	24	6200	289	H100_DRIL32.191F2	4	VA	1	30	4	7	4	5.5
42038	H100_DRIL32.191F2_63	Chile16_47_6	24	6201	282	H100_DRIL32.191F2	4	VA	1	30	3	7	5	6
42039	H100_DRIL32.191F2_73	Chile16_47_16	24	6202	292	H100_DRIL32.191F2	4	VA	1	30	2	7	4.5	5.75
42040	H100_DRIL32.191F2_44	Chile16_49_17	24	6203	263	H100_DRIL32.191F2	4	VA	1	30	1	7.5	4.5	6
42041	H100_DRIL32.191F2_39	Chile16_49_12	24	6204	258	H100_DRIL32.191F2	4	VA	1	31	1	7	5	6
42042	H100_DRIL32.191F2_62	Chile16_47_5	24	6205	281	H100_DRIL32.191F2	4	VA	1	31	2	6.5	3.5	5
42043	H100_DRIL32.191F2_74	Chile16_47_17	24	6206	293	H100_DRIL32.191F2	4	VA	1	31	3	7	3.5	5.25
42044	H100_DRIL32.191F2_9	Chile16_48_9	24	6207	228	H100_DRIL32.191F2	4	VA	1	31	4	7	3.5	5.25
42045	H100_DRIL32.191F2_86	Chile16_52_12	24	6208	305	H100_DRIL32.191F2	4	VA	1	31	5	7	.	7
42046	H100_DRIL32.191F2_51	Chile16_50_7	24	6209	270	H100_DRIL32.191F2	4	VA	1	31	6	7	3.5	5.25
42047	H100_DRIL32.191F2_5	Chile16_48_5	24	6210	224	H100_DRIL32.191F2	4	VA	1	31	7	7.5	4	5.75
42048	H100_DRIL32.191F2_80	Chile16_52_6	24	6211	299	H100_DRIL32.191F2	4	VA	1	31	8	7	4	5.5
42049	H100_DRIL32.191F2_6	Chile16_48_6	24	6212	225	H100_DRIL32.191F2	4	VA	1	31	9	6.5	4	5.25
42050	H100_DRIL32.191F2_72	Chile16_47_15	24	6213	291	H100_DRIL32.191F2	4	VA	1	31	10	7	4.5	5.75
42051	H100_DRIL32.191F2_37	Chile16_49_10	24	6214	256	H100_DRIL32.191F2	4	VA	1	31	11	7.5	4	5.75
42052	H100_DRIL32.191F2_33	Chile16_49_6	24	6215	252	H100_DRIL32.191F2	4	VA	1	31	12	7	4.5	5.75
42053	H100_DRIL32.191F2_65	Chile16_47_8	24	6216	284	H100_DRIL32.191F2	4	VA	1	31	13	7	4	5.5
42054	H100_DRIL32.191F2_34	Chile16_49_7	24	6217	253	H100_DRIL32.191F2	4	VA	1	31	14	7	4	5.5
42055	H100	'	24	6218	970	H100	4	VA	1	31	15	7	4	5.5
42056	H100_DRIL32.191F2_15	Chile16_51_3	24	6219	234	H100_DRIL32.191F2	4	VA	1	31	16	7	4	5.5
42057	H100_DRIL32.191F2_61	Chile16_47_4	24	6220	280	H100_DRIL32.191F2	4	VA	1	31	17	7	4	5.5
42058	H100_DRIL32.191F2_29	Chile16_49_2	25	6221	248	H100_DRIL32.191F2	4	VA	1	31	18	7.5	4	5.75
42059	H100	'	25	6222	970	H100	4	VA	1	31	19	7	4	5.5
42060	H100_DRIL32.191F2_82	Chile16_52_8	25	6223	301	H100_DRIL32.191F2	4	VA	1	31	20	7	4	5.5
42061	H100_DRIL32.191F2_1	Chile16_48_1	25	6224	220	H100_DRIL32.191F2	4	VA	1	31	21	7	4	5.5
42062	H100_DRIL32.191F2_67	Chile16_47_10	25	6225	286	H100_DRIL32.191F2	4	VA	1	31	22	7.5	.	3.75141
42063	H100_DRIL32.191F2_71	Chile16_47_14	25	6226	290	H100_DRIL32.191F2	4	VA	1	31	23	7	4	5.5
42064	H100_DRIL32.191F2_18	Chile16_51_6	25	6227	237	H100_DRIL32.191F2	4	VA	1	31	24	7	4	5.5
42065	H100_DRIL32.191F2_77	Chile16_52_3	25	6228	296	H100_DRIL32.191F2	4	VA	1	31	25	7.5	4.5	6
42066	H100_DRIL32.191F2_26	Chile16_51_14	25	6229	245	H100_DRIL32.191F2	4	VA	1	31	26	7	4	5.5
42067	H100_DRIL32.191F2_79	Chile16_52_5	25	6230	298	H100_DRIL32.191F2	4	VA	1	31	27	7	3.5	5.25
42068	H100_DRIL32.191F2_30	Chile16_49_3	25	6231	249	H100_DRIL32.191F2	4	VA	1	31	28	7.5	4	5.75
42069	H100_DRIL32.191F2_38	Chile16_49_11	25	6232	257	H100_DRIL32.191F2	4	VA	1	31	29	7.5	4	5.75
42070	H100_DRIL32.191F2_42	Chile16_49_15	25	6233	261	H100_DRIL32.191F2	4	VA	1	31	30	6.5	4	5.25
42071	H100_DRIL32.191F2_32	Chile16_49_5	25	6234	251	H100_DRIL32.191F2	4	VA	1	31	31	6	4	5
42072	H100_DRIL32.191F2_43	Chile16_49_16	25	6235	262	H100_DRIL32.191F2	4	VA	1	31	32	7	4	5.5
42073	H100_DRIL32.191F2_49	Chile16_50_5	25	6236	268	H100_DRIL32.191F2	4	VA	1	31	33	7	3.5	5.25
42074	H100_DRIL32.191F2_35	Chile16_49_8	25	6237	254	H100_DRIL32.191F2	4	VA	1	31	34	7	4	5.5
42075	H100_DRIL32.191F2_46	Chile16_50_2	25	6238	265	H100_DRIL32.191F2	4	VA	1	31	35	7	3.5	5.25
42076	H100_DRIL32.191F2_53	Chile16_50_9	25	6239	272	H100_DRIL32.191F2	4	VA	1	31	36	7	4	5.5
42077	H100_DRIL32.191F2_7	Chile16_48_7	25	6240	226	H100_DRIL32.191F2	4	VA	1	31	37	7.5	4.5	6
42078	H100_DRIL32.191F2_14	Chile16_51_2	25	6241	233	H100_DRIL32.191F2	4	VA	1	31	38	7	4	5.5
42080	H100_DRIL32.191F2_3	Chile16_48_3	26	6242	222	H100_DRIL32.191F2	4	VA	1	31	40	7	3.5	5.25
42081	H100_DRIL32.191F2_45	Chile16_50_1	26	6243	264	H100_DRIL32.191F2	4	VA	1	31	41	7	4.5	5.75
42082	DRIL32.191	'	26	6244	960	DRIL32.191	4	VA	1	31	42	7	4.5	5.75
42083	H100_DRIL32.191F2_85	Chile16_52_11	26	6245	304	H100_DRIL32.191F2	4	VA	1	31	43	7	4	5.5
42084	H100_DRIL32.191F2_23	Chile16_51_11	26	6246	242	H100_DRIL32.191F2	4	VA	1	31	44	7.5	5.5	6.5
42085	H100_DRIL32.191F2_81	Chile16_52_7	26	6247	300	H100_DRIL32.191F2	4	VA	1	31	45	7	5	6
42086	H100_DRIL32.191F2_76	Chile16_52_2	26	6248	295	H100_DRIL32.191F2	4	VA	1	31	46	7	4	5.5
42087	H100_DRIL32.191F2_60	Chile16_47_3	26	6249	279	H100_DRIL32.191F2	4	VA	1	31	47	7.5	4.5	6
42088	H100_DRIL32.191F2_64	Chile16_47_7	26	6250	283	H100_DRIL32.191F2	4	VA	1	31	48	7	4	5.5
42089	H100_DRIL32.191F2_8	Chile16_48_8	26	6251	227	H100_DRIL32.191F2	4	VA	1	31	49	7	3.5	5.25
42090	H100_DRIL32.191F2_16	Chile16_51_4	26	6252	235	H100_DRIL32.191F2	4	VA	1	31	50	7	3.5	5.25
42091	H100_DRIL32.191F2_31	Chile16_49_4	26	6253	250	H100_DRIL32.191F2	4	VA	1	31	51	7	4	5.5
42092	H100_DRIL32.191F2_66	Chile16_47_9	26	6254	285	H100_DRIL32.191F2	4	VA	1	31	52	7	4	5.5
42093	H100_DRIL32.191F2_75	Chile16_52_1	26	6255	294	H100_DRIL32.191F2	4	VA	1	31	53	7	4	5.5
42094	H100_DRIL32.191F2_47	Chile16_50_3	26	6256	266	H100_DRIL32.191F2	4	VA	1	31	54	7	4	5.5
42095	H100_DRIL32.191F2_10	Chile16_48_10	26	6257	229	H100_DRIL32.191F2	4	VA	1	31	55	7	3.5	5.25
42096	H100_DRIL32.191F2_54	Chile16_50_10	26	6258	273	H100_DRIL32.191F2	4	VA	1	31	56	7	4	5.5
42097	H100_DRIL32.191F2_78	Chile16_52_4	26	6259	297	H100_DRIL32.191F2	4	VA	1	31	57	7	3.5	5.25
42098	H100	'	26	6260	970	H100	4	VA	1	31	58	7	3.5	5.25
42099	H100_DRIL32.191F2_2	Chile16_48_2	26	6261	221	H100_DRIL32.191F2	4	VA	1	31	59	7	4	5.5
42100	H100_DRIL32.191F2_22	Chile16_51_10	26	6262	241	H100_DRIL32.191F2	4	VA	1	31	60	7	3.5	5.25
42101	H100_DRIL32.191F2_52	Chile16_50_8	27	6263	271	H100_DRIL32.191F2	4	VA	1	31	61	7	4	5.5
42102	H100_DRIL32.191F2_20	Chile16_51_8	27	6264	239	H100_DRIL32.191F2	4	VA	1	31	62	7	4	5.5
42103	H100_DRIL32.191F2_17	Chile16_51_5	27	6265	236	H100_DRIL32.191F2	4	VA	1	31	63	6.5	3.5	5
42104	H100_DRIL32.191F2_50	Chile16_50_6	27	6266	269	H100_DRIL32.191F2	4	VA	1	31	64	6.5	3.5	5
42105	H100_DRIL32.191F2_19	Chile16_51_7	27	6267	238	H100_DRIL32.191F2	4	VA	1	31	65	7	4	5.5
42106	H100_DRIL32.191F2_12	Chile16_48_12	27	6268	231	H100_DRIL32.191F2	4	VA	1	31	66	7	5.5	6.25
42107	H100_DRIL32.191F2_59	Chile16_47_2	27	6269	278	H100_DRIL32.191F2	4	VA	1	31	67	7	4	5.5
42108	H100_DRIL32.191F2_69	Chile16_47_12	27	6270	288	H100_DRIL32.191F2	4	VA	1	31	68	7	4	5.5
42109	H100_DRIL32.191F2_41	Chile16_49_14	27	6271	260	H100_DRIL32.191F2	4	VA	1	32	68	7	5	6
42110	H100_DRIL32.191F2_58	Chile16_47_1	27	6272	277	H100_DRIL32.191F2	4	VA	1	32	67	7	5	6
42111	H100_DRIL32.191F2_36	Chile16_49_9	27	6273	255	H100_DRIL32.191F2	4	VA	1	32	66	7	4	5.5
42112	H100_DRIL32.191F2_11	Chile16_48_11	27	6274	230	H100_DRIL32.191F2	4	VA	1	32	65	7	4.5	5.75
42113	H100_DRIL32.191F2_4	Chile16_48_4	27	6275	223	H100_DRIL32.191F2	4	VA	1	32	64	7	4	5.5
42114	H100_DRIL32.191F2_55	Chile16_50_11	27	6276	274	H100_DRIL32.191F2	4	VA	1	32	63	7	4	5.5
42115	H100_DRIL32.191F2_28	Chile16_49_1	27	6277	247	H100_DRIL32.191F2	4	VA	1	32	62	7	4	5.5
42116	H100_DRIL32.191F2_48	Chile16_50_4	27	6278	267	H100_DRIL32.191F2	4	VA	1	32	61	7	2.5	4.75
42117	H100_DRIL52.055F2_7	Chile16_53_7	27	6279	312	H100_DRIL52.055F2	5	VA	1	32	60	7.5	4	5.75
42118	H100_DRIL52.055F2_34	Chile16_58_13	27	6280	339	H100_DRIL52.055F2	5	VA	1	32	59	8	5	6.5
42119	H100	'	27	6281	970	H100	5	VA	1	32	58	7	3.5	5.25
42120	H100_DRIL52.055F2_24	Chile16_58_3	27	6282	329	H100_DRIL52.055F2	5	VA	1	32	57	7	4	5.5
42121	H100_DRIL52.055F2_57	Chile16_57_15	27	6283	362	H100_DRIL52.055F2	5	VA	1	32	56	7.5	.	7.5
42122	H100_DRIL52.055F2_55	Chile16_57_13	28	6284	360	H100_DRIL52.055F2	5	VA	1	32	55	7	4	5.5
42123	H100_DRIL52.055F2_28	Chile16_58_7	28	6285	333	H100_DRIL52.055F2	5	VA	1	32	54	7	4	5.5
42124	H100_DRIL52.055F2_8	Chile16_56_1	28	6286	313	H100_DRIL52.055F2	5	VA	1	32	53	7.5	4	5.75
42125	H100_DRIL52.055F2_41	Chile16_54_7	28	6287	346	H100_DRIL52.055F2	5	VA	1	32	52	7.5	4.5	6
42126	H100_DRIL52.055F2_50	Chile16_57_8	28	6288	355	H100_DRIL52.055F2	5	VA	1	32	51	7.5	4	5.75
42127	H100_DRIL52.055F2_56	Chile16_57_14	28	6289	361	H100_DRIL52.055F2	5	VA	1	32	50	7	5	6
42128	H100	'	28	6290	970	H100	5	VA	1	32	49	7	4	5.5
42129	H100_DRIL52.055F2_31	Chile16_58_10	28	6291	336	H100_DRIL52.055F2	5	VA	1	32	48	7	4	5.5
42130	H100_DRIL52.055F2_64	Chile16_55_3	28	6292	369	H100_DRIL52.055F2	5	VA	1	32	47	7	4	5.5
42131	H100_DRIL52.055F2_4	Chile16_53_4	28	6293	309	H100_DRIL52.055F2	5	VA	1	32	46	7.5	4	5.75
42132	H100_DRIL52.055F2_16	Chile16_56_9	28	6294	321	H100_DRIL52.055F2	5	VA	1	32	45	7.5	4.5	6
42133	H100_DRIL52.055F2_61	Chile16_57_19	28	6295	366	H100_DRIL52.055F2	5	VA	1	32	44	7.5	4.5	6
42134	H100_DRIL52.055F2_6	Chile16_53_6	28	6296	311	H100_DRIL52.055F2	5	VA	1	32	43	7.5	5	6.25
42135	H100_DRIL52.055F2_19	Chile16_56_12	28	6297	324	H100_DRIL52.055F2	5	VA	1	32	42	7	5	6
42136	H100_DRIL52.055F2_33	Chile16_58_12	28	6298	338	H100_DRIL52.055F2	5	VA	1	32	41	7	5	6
42137	H100_DRIL52.055F2_63	Chile16_55_2	28	6299	368	H100_DRIL52.055F2	5	VA	1	32	40	7.5	5	6.25
42138	H100_DRIL52.055F2_36	Chile16_54_2	28	6300	341	H100_DRIL52.055F2	5	VA	1	32	39	7	5	6
42139	H100_DRIL52.055F2_62	Chile16_55_1	28	6301	367	H100_DRIL52.055F2	5	VA	1	32	38	7	5	6
42140	H100_DRIL52.055F2_10	Chile16_56_3	28	6302	315	H100_DRIL52.055F2	5	VA	1	32	37	7.5	5	6.25
42141	H100	'	28	6303	970	H100	5	VA	1	32	36	7	3.5	5.25
42142	H100_DRIL52.055F2_46	Chile16_57_4	28	6304	351	H100_DRIL52.055F2	5	VA	1	32	35	7	4.5	5.75
42143	DRIL52.055	'	29	6305	961	DRIL52.055	5	VA	1	32	34	8	6	7
42144	H100_DRIL52.055F2_45	Chile16_57_3	29	6306	350	H100_DRIL52.055F2	5	VA	1	32	33	7	5	6
42145	H100_DRIL52.055F2_58	Chile16_57_16	29	6307	363	H100_DRIL52.055F2	5	VA	1	32	32	7	5.5	6.25
42146	H100_DRIL52.055F2_68	Chile16_55_7	29	6308	373	H100_DRIL52.055F2	5	VA	1	32	31	7.5	5.5	6.5
42147	H100_DRIL52.055F2_42	Chile16_54_8	29	6309	347	H100_DRIL52.055F2	5	VA	1	32	30	7	4	5.5
42148	H100_DRIL52.055F2_3	Chile16_53_3	29	6310	308	H100_DRIL52.055F2	5	VA	1	32	29	7	4	5.5
42149	H100_DRIL52.055F2_48	Chile16_57_6	29	6311	353	H100_DRIL52.055F2	5	VA	1	32	28	7.5	2.5	5
42150	H100	'	29	6312	970	H100	5	VA	1	32	27	7	4	5.5
42151	H100_DRIL52.055F2_38	Chile16_54_4	29	6313	343	H100_DRIL52.055F2	5	VA	1	32	26	8	5.5	6.75
42152	H100_DRIL52.055F2_47	Chile16_57_5	29	6314	352	H100_DRIL52.055F2	5	VA	1	32	25	7.5	5.5	6.5
42153	H100_DRIL52.055F2_30	Chile16_58_9	29	6315	335	H100_DRIL52.055F2	5	VA	1	32	24	7.5	5	6.25
42154	H100_DRIL52.055F2_14	Chile16_56_7	29	6316	319	H100_DRIL52.055F2	5	VA	1	32	23	7.5	5	6.25
42155	H100_DRIL52.055F2_1	Chile16_53_1	29	6317	306	H100_DRIL52.055F2	5	VA	1	32	22	7	5.5	6.25
42156	H100_DRIL52.055F2_29	Chile16_58_8	29	6318	334	H100_DRIL52.055F2	5	VA	1	32	21	7.5	5.5	6.5
42157	H100_DRIL52.055F2_9	Chile16_56_2	29	6319	314	H100_DRIL52.055F2	5	VA	1	32	20	7.5	5.5	6.5
42158	H100_DRIL52.055F2_65	Chile16_55_4	29	6320	370	H100_DRIL52.055F2	5	VA	1	32	19	7.5	6	6.75
42159	H100_DRIL52.055F2_43	Chile16_57_1	29	6321	348	H100_DRIL52.055F2	5	VA	1	32	18	7.5	5	6.25
42161	H100_DRIL52.055F2_27	Chile16_58_6	29	6323	332	H100_DRIL52.055F2	5	VA	1	32	16	7.5	5	6.25
42162	H100_DRIL52.055F2_49	Chile16_57_7	29	6324	354	H100_DRIL52.055F2	5	VA	1	32	15	7	5	6
42163	H100_DRIL52.055F2_25	Chile16_58_4	29	6325	330	H100_DRIL52.055F2	5	VA	1	32	14	7.5	5	6.25
42165	H100_DRIL52.055F2_44	Chile16_57_2	30	6327	349	H100_DRIL52.055F2	5	VA	1	32	12	7	4	5.5
42166	H100_DRIL52.055F2_13	Chile16_56_6	30	6328	318	H100_DRIL52.055F2	5	VA	1	32	11	7	4.5	5.75
42167	H100_DRIL52.055F2_67	Chile16_55_6	30	6329	372	H100_DRIL52.055F2	5	VA	1	32	10	7.5	5	6.25
42168	H100_DRIL52.055F2_17	Chile16_56_10	30	6330	322	H100_DRIL52.055F2	5	VA	1	32	9	7	5	6
42169	H100_DRIL52.055F2_26	Chile16_58_5	30	6331	331	H100_DRIL52.055F2	5	VA	1	32	8	7	4.5	5.75
42171	H100_DRIL52.055F2_23	Chile16_58_2	30	6333	328	H100_DRIL52.055F2	5	VA	1	32	6	7	4	5.5
42172	H100_DRIL52.055F2_22	Chile16_58_1	30	6334	327	H100_DRIL52.055F2	5	VA	1	32	5	7.5	5	6.25
42173	H100_DRIL52.055F2_53	Chile16_57_11	30	6335	358	H100_DRIL52.055F2	5	VA	1	32	4	7	4	5.5
42175	H100_DRIL52.055F2_21	Chile16_56_14	30	6337	326	H100_DRIL52.055F2	5	VA	1	32	2	7.5	4.5	6
42176	H100_DRIL52.055F2_15	Chile16_56_8	30	6338	320	H100_DRIL52.055F2	5	VA	1	32	1	7	4	5.5
42177	H100_DRIL52.055F2_5	Chile16_53_5	30	6339	310	H100_DRIL52.055F2	5	VA	1	33	1	7.5	6	6.75
42178	H100_DRIL52.055F2_59	Chile16_57_17	30	6340	364	H100_DRIL52.055F2	5	VA	1	33	2	7	4.5	5.75
42179	H100	'	30	6341	970	H100	5	VA	1	33	3	7	4	5.5
42180	H100_DRIL52.055F2_60	Chile16_57_18	30	6342	365	H100_DRIL52.055F2	5	VA	1	33	4	7	4	5.5
42181	H100_DRIL52.055F2_35	Chile16_54_1	30	6343	340	H100_DRIL52.055F2	5	VA	1	33	5	7.5	5	6.25
42182	H100_DRIL52.055F2_54	Chile16_57_12	30	6344	359	H100_DRIL52.055F2	5	VA	1	33	6	7.5	5	6.25
42183	H100_DRIL52.055F2_37	Chile16_54_3	30	6345	342	H100_DRIL52.055F2	5	VA	1	33	7	7.5	5.5	6.5
42184	H100_DRIL52.055F2_18	Chile16_56_11	30	6346	323	H100_DRIL52.055F2	5	VA	1	33	8	7.5	5	6.25
42186	H100_DRIL52.055F2_40	Chile16_54_6	31	6347	345	H100_DRIL52.055F2	5	VA	1	33	10	7	4.5	5.75
42187	H100_DRIL52.055F2_2	Chile16_53_2	31	6348	307	H100_DRIL52.055F2	5	VA	1	33	11	7	5	6
42188	H100_DRIL52.055F2_32	Chile16_58_11	31	6349	337	H100_DRIL52.055F2	5	VA	1	33	12	7	4.5	5.75
42189	H100_DRIL52.055F2_66	Chile16_55_5	31	6350	371	H100_DRIL52.055F2	5	VA	1	33	13	7.5	5.5	6.5
42190	H100_DRIL52.055F2_39	Chile16_54_5	31	6351	344	H100_DRIL52.055F2	5	VA	1	33	14	7.5	5.5	6.5
42191	H100_DRIL52.055F2_12	Chile16_56_5	31	6352	317	H100_DRIL52.055F2	5	VA	1	33	15	7.5	5.5	6.5
42192	H100_DRIL62.030F2_24	Chile16_77_6	31	6353	575	H100_DRIL62.030F2	8	VA	1	33	16	7	5	6
42193	H100_DRIL62.030F2_19	Chile16_77_1	31	6354	570	H100_DRIL62.030F2	8	VA	1	33	17	7.5	5	6.25
42194	H100_DRIL62.030F2_44	Chile16_80_3	31	6355	595	H100_DRIL62.030F2	8	VA	1	33	18	7	4	5.5
42195	H100	'	31	6356	970	H100	8	VA	1	33	19	7	4	5.5
42196	H100_DRIL62.030F2_45	Chile16_80_4	31	6357	596	H100_DRIL62.030F2	8	VA	1	33	20	7.5	4.5	6
42197	H100_DRIL62.030F2_29	Chile16_77_11	31	6358	580	H100_DRIL62.030F2	8	VA	1	33	21	7	4.5	5.75
42198	H100_DRIL62.030F2_7	Chile16_79_7	31	6359	558	H100_DRIL62.030F2	8	VA	1	33	22	7	4.5	5.75
42199	H100_DRIL62.030F2_10	Chile16_79_10	31	6360	561	H100_DRIL62.030F2	8	VA	1	33	23	7	5	6
42200	H100_DRIL62.030F2_3	Chile16_79_3	31	6361	554	H100_DRIL62.030F2	8	VA	1	33	24	7	5	6
42201	H100_DRIL62.030F2_20	Chile16_77_2	31	6362	571	H100_DRIL62.030F2	8	VA	1	33	25	7	5	6
42202	H100_DRIL62.030F2_4	Chile16_79_4	31	6363	555	H100_DRIL62.030F2	8	VA	1	33	26	7	4.5	5.75
42204	H100_DRIL62.030F2_15	Chile16_78_2	31	6365	566	H100_DRIL62.030F2	8	VA	1	33	28	7	4	5.5
42205	H100_DRIL62.030F2_23	Chile16_77_5	31	6366	574	H100_DRIL62.030F2	8	VA	1	33	29	7.5	5.5	6.5
42206	H100_DRIL62.030F2_18	Chile16_78_5	31	6367	569	H100_DRIL62.030F2	8	VA	1	33	30	7.5	5.5	6.5
42210	H100_DRIL62.030F2_28	Chile16_77_10	32	6371	579	H100_DRIL62.030F2	8	VA	1	33	34	7.5	5	6.25
42212	H100_DRIL62.030F2_43	Chile16_80_2	32	6373	594	H100_DRIL62.030F2	8	VA	1	33	36	7	4.5	5.75
42213	H100	'	32	6374	970	H100	8	VA	1	33	37	7	4.5	5.75
42215	H100_DRIL62.030F2_25	Chile16_77_7	32	6376	576	H100_DRIL62.030F2	8	VA	1	33	39	7	4	5.5
42216	H100_DRIL62.030F2_13	Chile16_79_13	32	6377	564	H100_DRIL62.030F2	8	VA	1	33	40	7	4	5.5
42218	H100_DRIL62.030F2_8	Chile16_79_8	32	6379	559	H100_DRIL62.030F2	8	VA	1	33	42	7	4.5	5.75
42219	H100_DRIL62.030F2_26	Chile16_77_8	32	6380	577	H100_DRIL62.030F2	8	VA	1	33	43	7	4	5.5
42221	H100_DRIL62.030F2_22	Chile16_77_4	32	6382	573	H100_DRIL62.030F2	8	VA	1	33	45	7	4.5	5.75
42222	H100	'	32	6383	970	H100	8	VA	1	33	46	7	4	5.5
42223	H100_DRIL62.030F2_27	Chile16_77_9	32	6384	578	H100_DRIL62.030F2	8	VA	1	33	47	7.5	5	6.25
42224	H100_DRIL62.030F2_11	Chile16_79_11	32	6385	562	H100_DRIL62.030F2	8	VA	1	33	48	7	5	6
42226	H100_DRIL62.030F2_47	Chile16_80_6	32	6387	598	H100_DRIL62.030F2	8	VA	1	33	50	7	4	5.5
42227	H100_DRIL62.030F2_12	Chile16_79_12	32	6388	563	H100_DRIL62.030F2	8	VA	1	33	51	7	4	5.5
42228	H100_DRIL62.030F2_6	Chile16_79_6	33	6389	557	H100_DRIL62.030F2	8	VA	1	33	52	7.5	4	5.75
42230	H100_DRIL62.030F2_49	Chile16_80_8	33	6391	600	H100_DRIL62.030F2	8	VA	1	33	54	7	4	5.5
42231	H100_DRIL62.030F2_42	Chile16_80_1	33	6392	593	H100_DRIL62.030F2	8	VA	1	33	55	7	3.5	5.25
42234	DRIL62.030	'	33	6395	964	DRIL62.030	8	VA	1	33	58	7.5	4.5	6
42235	H100_DRIL62.030F2_48	Chile16_80_7	33	6396	599	H100_DRIL62.030F2	8	VA	1	33	59	7.5	4	5.75
42236	H100_DRIL62.030F2_5	Chile16_79_5	33	6397	556	H100_DRIL62.030F2	8	VA	1	33	60	7	4	5.5
42238	H100_DRIL62.030F2_46	Chile16_80_5	33	6399	597	H100_DRIL62.030F2	8	VA	1	33	62	7.5	4.5	6
42239	H100_DRIL62.030F2_21	Chile16_77_3	33	6400	572	H100_DRIL62.030F2	8	VA	1	33	63	7	4.5	5.75
42245	H100	'	33	6406	970	H100	9	VA	1	34	68	7	6	6.5
42246	H100_DRIL62.078F2_41	Chile16_89_13	33	6407	641	H100_DRIL62.078F2	9	VA	1	34	67	7.5	5.5	6.5
42247	H100_DRIL62.078F2_37	Chile16_89_9	33	6408	637	H100_DRIL62.078F2	9	VA	1	34	66	7	5	6
42248	H100_DRIL62.078F2_34	Chile16_89_6	33	6409	634	H100_DRIL62.078F2	9	VA	1	34	65	7.5	5	6.25
42249	H100_DRIL62.078F2_64	Chile16_91_7	34	6410	664	H100_DRIL62.078F2	9	VA	1	34	64	7	5	6
42250	H100_DRIL62.078F2_8	Chile16_88_8	34	6411	608	H100_DRIL62.078F2	9	VA	1	34	63	7	5	6
42251	H100_DRIL62.078F2_38	Chile16_89_10	34	6412	638	H100_DRIL62.078F2	9	VA	1	34	62	7.5	5	6.25
42252	H100_DRIL62.078F2_68	Chile16_91_11	34	6413	668	H100_DRIL62.078F2	9	VA	1	34	61	7	5	6
42253	H100_DRIL62.078F2_79	Chile16_92_10	34	6414	679	H100_DRIL62.078F2	9	VA	1	34	60	7	5	6
42254	DRIL62.078	'	34	6415	965	DRIL62.078	9	VA	1	34	59	7.5	6	6.75
42255	H100_DRIL62.078F2_26	Chile16_90_11	34	6416	626	H100_DRIL62.078F2	9	VA	1	34	58	7.5	6	6.75
42256	H100_DRIL62.078F2_12	Chile16_88_12	34	6417	612	H100_DRIL62.078F2	9	VA	1	34	57	7.5	6	6.75
42257	H100_DRIL62.078F2_75	Chile16_92_6	34	6418	675	H100_DRIL62.078F2	9	VA	1	34	56	7	5	6
42258	H100_DRIL62.078F2_36	Chile16_89_8	34	6419	636	H100_DRIL62.078F2	9	VA	1	34	55	7	6	6.5
42259	H100_DRIL62.078F2_76	Chile16_92_7	34	6420	676	H100_DRIL62.078F2	9	VA	1	34	54	7	5.5	6.25
42260	H100_DRIL62.078F2_71	Chile16_92_2	34	6421	671	H100_DRIL62.078F2	9	VA	1	34	53	7	5	6
42261	H100_DRIL62.078F2_58	Chile16_91_1	34	6422	658	H100_DRIL62.078F2	9	VA	1	34	52	7.5	5.5	6.5
42262	H100	'	34	6423	970	H100	9	VA	1	34	51	7	4	5.5
42263	H100_DRIL62.078F2_24	Chile16_90_9	34	6424	624	H100_DRIL62.078F2	9	VA	1	34	50	7.5	5.5	6.5
42264	H100_DRIL62.078F2_51	Chile16_93_5	34	6425	651	H100_DRIL62.078F2	9	VA	1	34	49	7	5.5	6.25
42265	H100_DRIL62.078F2_66	Chile16_91_9	34	6426	666	H100_DRIL62.078F2	9	VA	1	34	48	7	5.5	6.25
42267	H100_DRIL62.078F2_33	Chile16_89_5	34	6428	633	H100_DRIL62.078F2	9	VA	1	34	46	7.5	5.5	6.5
42268	H100_DRIL62.078F2_49	Chile16_93_3	34	6429	649	H100_DRIL62.078F2	9	VA	1	34	45	7	5	6
42270	H100_DRIL62.078F2_86	Chile16_92_17	35	6431	686	H100_DRIL62.078F2	9	VA	1	34	43	7	.	7
42271	H100_DRIL62.078F2_73	Chile16_92_4	35	6432	673	H100_DRIL62.078F2	9	VA	1	34	42	7	4.5	5.75
42272	H100_DRIL62.078F2_7	Chile16_88_7	35	6433	607	H100_DRIL62.078F2	9	VA	1	34	41	7.5	4.5	6
42273	H100_DRIL62.078F2_18	Chile16_90_3	35	6434	618	H100_DRIL62.078F2	9	VA	1	34	40	7.5	5	6.25
42274	H100_DRIL62.078F2_85	Chile16_92_16	35	6435	685	H100_DRIL62.078F2	9	VA	1	34	39	7	4	5.5
42275	H100	'	35	6436	970	H100	9	VA	1	34	38	7	4	5.5
42276	H100_DRIL62.078F2_59	Chile16_91_2	35	6437	659	H100_DRIL62.078F2	9	VA	1	34	37	7.5	5.5	6.5
42277	H100_DRIL62.078F2_80	Chile16_92_11	35	6438	680	H100_DRIL62.078F2	9	VA	1	34	36	7	4.5	5.75
42278	H100_DRIL62.078F2_35	Chile16_89_7	35	6439	635	H100_DRIL62.078F2	9	VA	1	34	35	7.5	5.5	6.5
42279	H100_DRIL62.078F2_17	Chile16_90_2	35	6440	617	H100_DRIL62.078F2	9	VA	1	34	34	7.5	5.5	6.5
42280	H100_DRIL62.078F2_62	Chile16_91_5	35	6441	662	H100_DRIL62.078F2	9	VA	1	34	33	7	4.5	5.75
42281	H100	'	35	6442	970	H100	9	VA	1	34	32	7	4	5.5
42282	H100_DRIL62.078F2_83	Chile16_92_14	35	6443	683	H100_DRIL62.078F2	9	VA	1	34	31	7.5	5.5	6.5
42283	H100_DRIL62.078F2_69	Chile16_91_12	35	6444	669	H100_DRIL62.078F2	9	VA	1	34	30	7.5	5.5	6.5
42284	H100_DRIL62.078F2_32	Chile16_89_4	35	6445	632	H100_DRIL62.078F2	9	VA	1	34	29	7.5	5.5	6.5
42285	H100_DRIL62.078F2_10	Chile16_88_10	35	6446	610	H100_DRIL62.078F2	9	VA	1	34	28	7.5	4.5	6
42286	H100_DRIL62.078F2_42	Chile16_89_14	35	6447	642	H100_DRIL62.078F2	9	VA	1	34	27	7	5.5	6.25
42287	H100_DRIL62.078F2_27	Chile16_90_12	35	6448	627	H100_DRIL62.078F2	9	VA	1	34	26	7.5	5.5	6.5
42288	H100_DRIL62.078F2_30	Chile16_89_2	35	6449	630	H100_DRIL62.078F2	9	VA	1	34	25	8	6	7
42290	H100_DRIL62.078F2_21	Chile16_90_6	35	6451	621	H100_DRIL62.078F2	9	VA	1	34	23	7.5	6	6.75
42292	H100	'	36	6452	970	H100	9	VA	1	34	21	7	5	6
42294	H100_DRIL62.078F2_5	Chile16_88_5	36	6454	605	H100_DRIL62.078F2	9	VA	1	34	19	7.5	5.5	6.5
42295	H100_DRIL62.078F2_19	Chile16_90_4	36	6455	619	H100_DRIL62.078F2	9	VA	1	34	18	7.5	6	6.75
42297	H100_DRIL62.078F2_55	Chile16_93_9	36	6457	655	H100_DRIL62.078F2	9	VA	1	34	16	7.5	6	6.75
42299	H100_DRIL62.078F2_23	Chile16_90_8	36	6459	623	H100_DRIL62.078F2	9	VA	1	34	14	7	5.5	6.25
42300	H100_DRIL62.078F2_60	Chile16_91_3	36	6460	660	H100_DRIL62.078F2	9	VA	1	34	13	7	5	6
42301	H100_DRIL62.078F2_87	Chile16_92_18	36	6461	687	H100_DRIL62.078F2	9	VA	1	34	12	7	5	6
42303	H100_DRIL62.078F2_48	Chile16_93_2	36	6463	648	H100_DRIL62.078F2	9	VA	1	34	10	7.5	5.5	6.5
42304	H100_DRIL62.078F2_1	Chile16_88_1	36	6464	601	H100_DRIL62.078F2	9	VA	1	34	9	7	5	6
42305	H100_DRIL62.078F2_84	Chile16_92_15	36	6465	684	H100_DRIL62.078F2	9	VA	1	34	8	7.5	6	6.75
42306	H100_DRIL62.078F2_40	Chile16_89_12	36	6466	640	H100_DRIL62.078F2	9	VA	1	34	7	7	5	6
42307	H100_DRIL62.078F2_63	Chile16_91_6	36	6467	663	H100_DRIL62.078F2	9	VA	1	34	6	7	4.5	5.75
42308	H100_DRIL62.078F2_50	Chile16_93_4	36	6468	650	H100_DRIL62.078F2	9	VA	1	34	5	7.5	5	6.25
42309	H100_DRIL62.078F2_31	Chile16_89_3	36	6469	631	H100_DRIL62.078F2	9	VA	1	34	4	7	4	5.5
42310	H100_DRIL62.078F2_56	Chile16_93_10	36	6470	656	H100_DRIL62.078F2	9	VA	1	34	3	7.5	4.5	6
42311	H100_DRIL62.078F2_78	Chile16_92_9	36	6471	678	H100_DRIL62.078F2	9	VA	1	34	2	7.5	5	6.25
42312	H100_DRIL62.078F2_53	Chile16_93_7	36	6472	653	H100_DRIL62.078F2	9	VA	1	34	1	7.5	5	6.25
42313	H100_DRIL62.078F2_81	Chile16_92_12	37	6473	681	H100_DRIL62.078F2	9	VA	1	35	1	7	4	5.5
42314	H100_DRIL62.078F2_2	Chile16_88_2	37	6474	602	H100_DRIL62.078F2	9	VA	1	35	2	7	4.5	5.75
42315	H100_DRIL62.078F2_29	Chile16_89_1	37	6475	629	H100_DRIL62.078F2	9	VA	1	35	3	7	4.5	5.75
42316	H100_DRIL62.078F2_47	Chile16_93_1	37	6476	647	H100_DRIL62.078F2	9	VA	1	35	4	7.5	4	5.75
42317	H100_DRIL62.078F2_72	Chile16_92_3	37	6477	672	H100_DRIL62.078F2	9	VA	1	35	5	7	4.5	5.75
42318	H100_DRIL62.078F2_25	Chile16_90_10	37	6478	625	H100_DRIL62.078F2	9	VA	1	35	6	7	4	5.5
42319	H100_DRIL62.078F2_77	Chile16_92_8	37	6479	677	H100_DRIL62.078F2	9	VA	1	35	7	7	4.5	5.75
42320	H100_DRIL62.078F2_6	Chile16_88_6	37	6480	606	H100_DRIL62.078F2	9	VA	1	35	8	7.5	6	6.75
42321	H100_DRIL62.078F2_67	Chile16_91_10	37	6481	667	H100_DRIL62.078F2	9	VA	1	35	9	7	4.5	5.75
42322	H100_DRIL62.078F2_52	Chile16_93_6	37	6482	652	H100_DRIL62.078F2	9	VA	1	35	10	7.5	5.5	6.5
42323	H100_DRIL62.078F2_15	Chile16_88_15	37	6483	615	H100_DRIL62.078F2	9	VA	1	35	11	7	5	6
42324	H100_DRIL62.078F2_3	Chile16_88_3	37	6484	603	H100_DRIL62.078F2	9	VA	1	35	12	7.5	5.5	6.5
42325	H100_DRIL62.078F2_61	Chile16_91_4	37	6485	661	H100_DRIL62.078F2	9	VA	1	35	13	7	5.5	6.25
42326	H100	'	37	6486	970	H100	9	VA	1	35	14	7	4	5.5
42327	H100_DRIL62.078F2_65	Chile16_91_8	37	6487	665	H100_DRIL62.078F2	9	VA	1	36	15	7.5	5	6.25
42328	H100_DRIL62.078F2_13	Chile16_88_13	37	6488	613	H100_DRIL62.078F2	9	VA	1	36	16	7	4.5	5.75
42329	H100_DRIL62.078F2_57	Chile16_93_11	37	6489	657	H100_DRIL62.078F2	9	VA	1	35	17	7.5	6	6.75
42330	H100_DRIL62.078F2_22	Chile16_90_7	37	6490	622	H100_DRIL62.078F2	9	VA	1	35	18	7.5	5.5	6.5
42331	H100_DRIL62.078F2_11	Chile16_88_11	37	6491	611	H100_DRIL62.078F2	9	VA	1	35	19	7.5	5.5	6.5
42332	H100_DRIL62.078F2_14	Chile16_88_14	37	6492	614	H100_DRIL62.078F2	9	VA	1	35	20	7	5	6
42333	H100_DRIL62.078F2_20	Chile16_90_5	37	6493	620	H100_DRIL62.078F2	9	VA	1	35	21	7	5	6
42334	H100_DRIL62.078F2_82	Chile16_92_13	38	6494	682	H100_DRIL62.078F2	9	VA	1	35	22	7	4.5	5.75
42335	H100_DRIL62.078F2_9	Chile16_88_9	38	6495	609	H100_DRIL62.078F2	9	VA	1	35	23	7.5	6	6.75
42336	H100_DRIL62.078F2_39	Chile16_89_11	38	6496	639	H100_DRIL62.078F2	9	VA	1	35	24	7	5	6
42337	H100_DRIL62.078F2_74	Chile16_92_5	38	6497	674	H100_DRIL62.078F2	9	VA	1	35	25	7.5	5.5	6.5
42338	H100_DRIL62.078F2_16	Chile16_90_1	38	6498	616	H100_DRIL62.078F2	9	VA	1	35	26	7	5.5	6.25
42339	H100_DRIL62.078F2_54	Chile16_93_8	38	6499	654	H100_DRIL62.078F2	9	VA	1	35	27	7	4.5	5.75
42340	H100_DRIL72.040F2_50	Chile16_127_10	38	6500	800	H100_DRIL72.040F2	11	VA	1	35	28	7	4	5.5
42341	H100_DRIL72.040F2_59	Chile16_124_7	38	6501	809	H100_DRIL72.040F2	11	VA	1	35	29	7	5	6
42342	H100_DRIL72.040F2_15	Chile16_128_8	38	6502	765	H100_DRIL72.040F2	11	VA	1	35	30	7	4	5.5
42343	H100_DRIL72.040F2_3	Chile16_125_3	38	6503	753	H100_DRIL72.040F2	11	VA	1	35	31	7	4	5.5
42344	H100_DRIL72.040F2_58	Chile16_124_6	38	6504	808	H100_DRIL72.040F2	11	VA	1	35	32	7	2.5	4.75
42345	H100_DRIL72.040F2_53	Chile16_124_1	38	6505	803	H100_DRIL72.040F2	11	VA	1	35	33	7	4.5	5.75
42346	H100_DRIL72.040F2_52	Chile16_127_12	38	6506	802	H100_DRIL72.040F2	11	VA	1	35	34	7	4.5	5.75
42347	H100_DRIL72.040F2_62	Chile16_124_10	38	6507	812	H100_DRIL72.040F2	11	VA	1	35	35	6.5	3.5	5
42348	H100	'	38	6508	970	H100	11	VA	1	35	36	7	3.5	5.25
42349	H100_DRIL72.040F2_34	Chile16_126_4	38	6509	784	H100_DRIL72.040F2	11	VA	1	35	37	7	3.5	5.25
42350	H100	'	38	6510	970	H100	11	VA	1	35	38	7	3.5	5.25
42351	H100_DRIL72.040F2_28	Chile16_129_12	38	6511	778	H100_DRIL72.040F2	11	VA	1	35	39	7	4	5.5
42352	H100_DRIL72.040F2_61	Chile16_124_9	38	6512	811	H100_DRIL72.040F2	11	VA	1	35	40	7	3.5	5.25
42353	H100_DRIL72.040F2_55	Chile16_124_3	38	6513	805	H100_DRIL72.040F2	11	VA	1	35	41	7	3.5	5.25
42354	H100_DRIL72.040F2_40	Chile16_126_10	38	6514	790	H100_DRIL72.040F2	11	VA	1	35	42	7.5	3.5	5.5
42355	H100_DRIL72.040F2_30	Chile16_129_14	39	6515	780	H100_DRIL72.040F2	11	VA	1	35	43	7.5	4	5.75
42356	H100_DRIL72.040F2_5	Chile16_125_5	39	6516	755	H100_DRIL72.040F2	11	VA	1	35	44	7	4	5.5
42357	H100_DRIL72.040F2_45	Chile16_127_5	39	6517	795	H100_DRIL72.040F2	11	VA	1	35	45	7	4	5.5
42358	H100	'	39	6518	970	H100	11	VA	1	35	46	7	4	5.5
42359	H100_DRIL72.040F2_48	Chile16_127_8	39	6519	798	H100_DRIL72.040F2	11	VA	1	35	47	7	4	5.5
42360	H100_DRIL72.040F2_46	Chile16_127_6	39	6520	796	H100_DRIL72.040F2	11	VA	1	35	48	7	4	5.5
42361	H100_DRIL72.040F2_37	Chile16_126_7	39	6521	787	H100_DRIL72.040F2	11	VA	1	35	49	7.5	4	5.75
42362	H100_DRIL72.040F2_63	Chile16_124_11	39	6522	813	H100_DRIL72.040F2	11	VA	1	35	50	7	4	5.5
42363	H100_DRIL72.040F2_16	Chile16_128_9	39	6523	766	H100_DRIL72.040F2	11	VA	1	35	51	7	4	5.5
42364	H100_DRIL72.040F2_54	Chile16_124_2	39	6524	804	H100_DRIL72.040F2	11	VA	1	35	52	7	4	5.5
42365	H100_DRIL72.040F2_13	Chile16_128_6	39	6525	763	H100_DRIL72.040F2	11	VA	1	35	53	7	4.5	5.75
42366	H100_DRIL72.040F2_64	Chile16_124_12	39	6526	814	H100_DRIL72.040F2	11	VA	1	35	54	7.5	4.5	6
42367	H100_DRIL72.040F2_7	Chile16_125_7	39	6527	757	H100_DRIL72.040F2	11	VA	1	35	55	7	4	5.5
42368	H100_DRIL72.040F2_9	Chile16_128_2	39	6528	759	H100_DRIL72.040F2	11	VA	1	35	56	7	4	5.5
42369	H100_DRIL72.040F2_39	Chile16_126_9	39	6529	789	H100_DRIL72.040F2	11	VA	1	35	57	7	5	6
42370	H100_DRIL72.040F2_8	Chile16_128_1	39	6530	758	H100_DRIL72.040F2	11	VA	1	35	58	7	4	5.5
42371	H100_DRIL72.040F2_10	Chile16_128_3	39	6531	760	H100_DRIL72.040F2	11	VA	1	35	59	7	4	5.5
42372	H100_DRIL72.040F2_51	Chile16_127_11	39	6532	801	H100_DRIL72.040F2	11	VA	1	35	60	7	4.5	5.75
42373	H100_DRIL72.040F2_60	Chile16_124_8	39	6533	810	H100_DRIL72.040F2	11	VA	1	35	61	7	4.5	5.75
42374	H100_DRIL72.040F2_21	Chile16_129_5	39	6534	771	H100_DRIL72.040F2	11	VA	1	35	62	7	4	5.5
42375	H100_DRIL72.040F2_42	Chile16_127_2	39	6535	792	H100_DRIL72.040F2	11	VA	1	35	63	7.5	4	5.75
42376	H100_DRIL72.040F2_1	Chile16_125_1	40	6536	751	H100_DRIL72.040F2	11	VA	1	35	64	7	4	5.5
42377	H100_DRIL72.040F2_6	Chile16_125_6	40	6537	756	H100_DRIL72.040F2	11	VA	1	35	65	7	4.5	5.75
42379	H100_DRIL72.040F2_26	Chile16_129_10	40	6539	776	H100_DRIL72.040F2	11	VA	1	35	67	7	4	5.5
42380	H100_DRIL72.040F2_41	Chile16_127_1	40	6540	791	H100_DRIL72.040F2	11	VA	1	35	68	7	4	5.5
42381	H100_DRIL72.040F2_32	Chile16_126_2	40	6541	782	H100_DRIL72.040F2	11	VA	1	36	68	7	5	6
42382	H100_DRIL72.040F2_27	Chile16_129_11	40	6542	777	H100_DRIL72.040F2	11	VA	1	36	67	7	4.5	5.75
42383	H100_DRIL72.040F2_17	Chile16_129_1	40	6543	767	H100_DRIL72.040F2	11	VA	1	36	66	7	4.5	5.75
42384	DRIL72.040	'	40	6544	967	DRIL72.040	11	VA	1	36	65	7	4	5.5
42385	H100_DRIL72.040F2_14	Chile16_128_7	40	6545	764	H100_DRIL72.040F2	11	VA	1	36	64	7	4	5.5
42386	H100	'	40	6546	970	H100	11	VA	1	36	63	7	4	5.5
42387	H100_DRIL72.040F2_25	Chile16_129_9	40	6547	775	H100_DRIL72.040F2	11	VA	1	36	62	7	4.5	5.75
42388	H100_DRIL72.040F2_29	Chile16_129_13	40	6548	779	H100_DRIL72.040F2	11	VA	1	36	61	7	4.5	5.75
42389	H100_DRIL72.040F2_23	Chile16_129_7	40	6549	773	H100_DRIL72.040F2	11	VA	1	36	60	7	4	5.5
42390	H100_DRIL72.040F2_31	Chile16_126_1	40	6550	781	H100_DRIL72.040F2	11	VA	1	36	59	7	4	5.5
42391	H100_DRIL72.040F2_47	Chile16_127_7	40	6551	797	H100_DRIL72.040F2	11	VA	1	36	58	7	4.5	5.75
42392	H100_DRIL72.040F2_18	Chile16_129_2	40	6552	768	H100_DRIL72.040F2	11	VA	1	36	57	7.5	5	6.25
42393	H100_DRIL72.040F2_4	Chile16_125_4	40	6553	754	H100_DRIL72.040F2	11	VA	1	36	56	7	5	6
42394	H100_DRIL72.040F2_19	Chile16_129_3	40	6554	769	H100_DRIL72.040F2	11	VA	1	36	55	7	4	5.5
42395	H100_DRIL72.040F2_57	Chile16_124_5	40	6555	807	H100_DRIL72.040F2	11	VA	1	36	54	7	5	6
42396	H100_DRIL72.040F2_43	Chile16_127_3	40	6556	793	H100_DRIL72.040F2	11	VA	1	36	53	7	4.5	5.75
42398	H100_DRIL72.040F2_24	Chile16_129_8	41	6557	774	H100_DRIL72.040F2	11	VA	1	36	51	7	4	5.5
42400	H100_DRIL72.040F2_12	Chile16_128_5	41	6559	762	H100_DRIL72.040F2	11	VA	1	36	49	7.5	4.5	6
42401	H100_DRIL72.040F2_56	Chile16_124_4	41	6560	806	H100_DRIL72.040F2	11	VA	1	36	48	7.5	4.5	6
42402	H100_DRIL72.040F2_11	Chile16_128_4	41	6561	761	H100_DRIL72.040F2	11	VA	1	36	47	7	4.5	5.75
42403	H100_DRIL72.040F2_2	Chile16_125_2	41	6562	752	H100_DRIL72.040F2	11	VA	1	36	46	7	5	6
42405	H100_DRIL72.040F2_20	Chile16_129_4	41	6564	770	H100_DRIL72.040F2	11	VA	1	36	44	7	4.5	5.75
42407	H100_DRIL72.040F2_49	Chile16_127_9	41	6566	799	H100_DRIL72.040F2	11	VA	1	36	42	7.5	5	6.25
42408	H100_DRIL72.040F2_22	Chile16_129_6	41	6567	772	H100_DRIL72.040F2	11	VA	1	36	41	7	5	6
42409	H100_DRIL72.040F2_44	Chile16_127_4	41	6568	794	H100_DRIL72.040F2	11	VA	1	36	40	7	5	6
42410	H100_DRIL52.157F2_42	Chile16_70_11	41	6569	415	H100_DRIL52.157F2	6	VA	1	36	39	7	4.5	5.75
42411	H100_DRIL52.157F2_80	Chile16_69_12	41	6570	453	H100_DRIL52.157F2	6	VA	1	36	38	7	4	5.5
42412	H100_DRIL52.157F2_39	Chile16_70_8	41	6571	412	H100_DRIL52.157F2	6	VA	1	36	37	6.5	4	5.25
42413	H100_DRIL52.157F2_48	Chile16_70_17	41	6572	421	H100_DRIL52.157F2	6	VA	1	36	36	7	4.5	5.75
42414	H100_DRIL52.157F2_29	Chile16_67_13	41	6573	402	H100_DRIL52.157F2	6	VA	1	36	35	7	4	5.5
42415	H100_DRIL52.157F2_34	Chile16_70_3	41	6574	407	H100_DRIL52.157F2	6	VA	1	36	34	7.5	5	6.25
42416	H100	'	41	6575	970	H100	6	VA	1	36	33	7	4.5	5.75
42417	H100_DRIL52.157F2_14	Chile16_65_14	41	6576	387	H100_DRIL52.157F2	6	VA	1	36	32	7	4.5	5.75
42418	H100_DRIL52.157F2_40	Chile16_70_9	41	6577	413	H100_DRIL52.157F2	6	VA	1	36	31	7.5	5.5	6.5
42419	H100_DRIL52.157F2_55	Chile16_66_5	42	6578	428	H100_DRIL52.157F2	6	VA	1	36	30	6.5	3.5	5
42420	H100_DRIL52.157F2_26	Chile16_67_10	42	6579	399	H100_DRIL52.157F2	6	VA	1	36	29	7	4	5.5
42421	H100_DRIL52.157F2_74	Chile16_69_6	42	6580	447	H100_DRIL52.157F2	6	VA	1	36	28	7	4	5.5
42422	H100_DRIL52.157F2_13	Chile16_65_13	42	6581	386	H100_DRIL52.157F2	6	VA	1	36	27	7.5	5	6.25
42423	H100_DRIL52.157F2_72	Chile16_69_4	42	6582	445	H100_DRIL52.157F2	6	VA	1	36	26	7	4	5.5
42424	H100_DRIL52.157F2_4	Chile16_65_4	42	6583	377	H100_DRIL52.157F2	6	VA	1	36	25	7	4	5.5
42425	H100_DRIL52.157F2_49	Chile16_70_18	42	6584	422	H100_DRIL52.157F2	6	VA	1	36	24	7	4	5.5
42426	H100_DRIL52.157F2_92	Chile16_68_7	42	6585	465	H100_DRIL52.157F2	6	VA	1	36	23	6.5	3.5	5
42427	H100_DRIL52.157F2_41	Chile16_70_10	42	6586	414	H100_DRIL52.157F2	6	VA	1	36	22	7	4	5.5
42428	H100_DRIL52.157F2_83	Chile16_69_15	42	6587	456	H100_DRIL52.157F2	6	VA	1	36	21	7	5	6
42429	H100	'	42	6588	970	H100	6	VA	1	36	20	7	4.5	5.75
42430	H100_DRIL52.157F2_22	Chile16_67_6	42	6589	395	H100_DRIL52.157F2	6	VA	1	36	19	7.5	5	6.25
42431	H100_DRIL52.157F2_94	Chile16_68_9	42	6590	467	H100_DRIL52.157F2	6	VA	1	36	18	7	4	5.5
42432	H100_DRIL52.157F2_15	Chile16_65_15	42	6591	388	H100_DRIL52.157F2	6	VA	1	36	17	7.5	5	6.25
42433	H100_DRIL52.157F2_71	Chile16_69_3	42	6592	444	H100_DRIL52.157F2	6	VA	1	37	16	7	5.5	6.25
42434	H100_DRIL52.157F2_64	Chile16_66_14	42	6593	437	H100_DRIL52.157F2	6	VA	1	37	15	7	4	5.5
42435	H100_DRIL52.157F2_63	Chile16_66_13	42	6594	436	H100_DRIL52.157F2	6	VA	1	36	14	7.5	5	6.25
42436	H100_DRIL52.157F2_69	Chile16_69_1	42	6595	442	H100_DRIL52.157F2	6	VA	1	36	13	7	4.5	5.75
42437	H100_DRIL52.157F2_7	Chile16_65_7	42	6596	380	H100_DRIL52.157F2	6	VA	1	36	12	7	4	5.5
42438	H100_DRIL52.157F2_10	Chile16_65_10	42	6597	383	H100_DRIL52.157F2	6	VA	1	36	11	7	4	5.5
42439	H100_DRIL52.157F2_44	Chile16_70_13	42	6598	417	H100_DRIL52.157F2	6	VA	1	36	10	7	4	5.5
42440	H100_DRIL52.157F2_91	Chile16_68_6	43	6599	464	H100_DRIL52.157F2	6	VA	1	36	9	6.5	4.5	5.5
42441	H100_DRIL52.157F2_9	Chile16_65_9	43	6600	382	H100_DRIL52.157F2	6	VA	1	36	8	7	4	5.5
42442	H100_DRIL52.157F2_24	Chile16_67_8	43	6601	397	H100_DRIL52.157F2	6	VA	1	36	7	7	5	6
42443	H100_DRIL52.157F2_17	Chile16_67_1	43	6602	390	H100_DRIL52.157F2	6	VA	1	36	6	7	4.5	5.75
42444	H100_DRIL52.157F2_76	Chile16_69_8	43	6603	449	H100_DRIL52.157F2	6	VA	1	36	5	7	5	6
42445	H100_DRIL52.157F2_58	Chile16_66_8	43	6604	431	H100_DRIL52.157F2	6	VA	1	36	4	7	4	5.5
42446	H100_DRIL52.157F2_96	Chile16_68_11	43	6605	469	H100_DRIL52.157F2	6	VA	1	36	3	7	4	5.5
42447	H100_DRIL52.157F2_54	Chile16_66_4	43	6606	427	H100_DRIL52.157F2	6	VA	1	36	2	7	4	5.5
42448	H100_DRIL52.157F2_87	Chile16_68_2	43	6607	460	H100_DRIL52.157F2	6	VA	1	36	1	7	4	5.5
42449	H100_DRIL52.157F2_12	Chile16_65_12	43	6608	385	H100_DRIL52.157F2	6	VA	1	37	1	7	5	6
42450	H100_DRIL52.157F2_6	Chile16_65_6	43	6609	379	H100_DRIL52.157F2	6	VA	1	37	2	7	4.5	5.75
42451	H100_DRIL52.157F2_88	Chile16_68_3	43	6610	461	H100_DRIL52.157F2	6	VA	1	37	3	7	4.5	5.75
42452	H100_DRIL52.157F2_5	Chile16_65_5	43	6611	378	H100_DRIL52.157F2	6	VA	1	37	4	7	4	5.5
42453	H100	'	43	6612	970	H100	6	VA	1	37	5	7	4	5.5
42454	H100	'	43	6613	970	H100	6	VA	1	37	6	7	4	5.5
42455	H100_DRIL52.157F2_75	Chile16_69_7	43	6614	448	H100_DRIL52.157F2	6	VA	1	37	7	7	4	5.5
42456	H100_DRIL52.157F2_25	Chile16_67_9	43	6615	398	H100_DRIL52.157F2	6	VA	1	37	8	7	5.5	6.25
42457	H100_DRIL52.157F2_79	Chile16_69_11	43	6616	452	H100_DRIL52.157F2	6	VA	1	37	9	7	4	5.5
42458	H100_DRIL52.157F2_100	Chile16_68_15	43	6617	473	H100_DRIL52.157F2	6	VA	1	37	10	7	5	6
42459	H100_DRIL52.157F2_43	Chile16_70_12	43	6618	416	H100_DRIL52.157F2	6	VA	1	37	11	7	4.5	5.75
42460	H100_DRIL52.157F2_62	Chile16_66_12	43	6619	435	H100_DRIL52.157F2	6	VA	1	37	12	7.5	4	5.75
42461	H100_DRIL52.157F2_77	Chile16_69_9	44	6620	450	H100_DRIL52.157F2	6	VA	1	37	13	7	4	5.5
42462	H100_DRIL52.157F2_61	Chile16_66_11	44	6621	434	H100_DRIL52.157F2	6	VA	1	37	14	7.5	4.5	6
42463	H100_DRIL52.157F2_23	Chile16_67_7	44	6622	396	H100_DRIL52.157F2	6	VA	1	38	15	7	4	5.5
42464	H100_DRIL52.157F2_8	Chile16_65_8	44	6623	381	H100_DRIL52.157F2	6	VA	1	38	16	7	5	6
42465	H100_DRIL52.157F2_28	Chile16_67_12	44	6624	401	H100_DRIL52.157F2	6	VA	1	37	17	7.5	5.5	6.5
42466	H100	'	44	6625	970	H100	6	VA	1	37	18	7	4	5.5
42467	H100_DRIL52.157F2_30	Chile16_67_14	44	6626	403	H100_DRIL52.157F2	6	VA	1	37	19	7	5.5	6.25
42468	H100_DRIL52.157F2_46	Chile16_70_15	44	6627	419	H100_DRIL52.157F2	6	VA	1	37	20	7	4	5.5
42469	H100_DRIL52.157F2_68	Chile16_66_18	44	6628	441	H100_DRIL52.157F2	6	VA	1	37	21	7	4	5.5
42470	H100_DRIL52.157F2_85	Chile16_69_17	44	6629	458	H100_DRIL52.157F2	6	VA	1	37	22	7	4	5.5
42471	H100_DRIL52.157F2_95	Chile16_68_10	44	6630	468	H100_DRIL52.157F2	6	VA	1	37	23	7	4	5.5
42472	H100_DRIL52.157F2_47	Chile16_70_16	44	6631	420	H100_DRIL52.157F2	6	VA	1	37	24	7	4.5	5.75
42473	H100_DRIL52.157F2_21	Chile16_67_5	44	6632	394	H100_DRIL52.157F2	6	VA	1	37	25	7	4	5.5
42474	H100_DRIL52.157F2_36	Chile16_70_5	44	6633	409	H100_DRIL52.157F2	6	VA	1	37	26	7	4	5.5
42475	H100_DRIL52.157F2_38	Chile16_70_7	44	6634	411	H100_DRIL52.157F2	6	VA	1	37	27	7	4	5.5
42476	H100_DRIL52.157F2_84	Chile16_69_16	44	6635	457	H100_DRIL52.157F2	6	VA	1	37	28	7	4.5	5.75
42477	H100_DRIL52.157F2_98	Chile16_68_13	44	6636	471	H100_DRIL52.157F2	6	VA	1	37	29	7	4	5.5
42478	H100_DRIL52.157F2_50	Chile16_70_19	44	6637	423	H100_DRIL52.157F2	6	VA	1	37	30	7.5	4.5	6
42479	H100_DRIL52.157F2_33	Chile16_70_2	44	6638	406	H100_DRIL52.157F2	6	VA	1	37	31	7	4.5	5.75
42480	H100_DRIL52.157F2_65	Chile16_66_15	44	6639	438	H100_DRIL52.157F2	6	VA	1	37	32	7	4.5	5.75
42481	H100_DRIL52.157F2_27	Chile16_67_11	44	6640	400	H100_DRIL52.157F2	6	VA	1	37	33	7	4.5	5.75
42482	H100_DRIL52.157F2_20	Chile16_67_4	45	6641	393	H100_DRIL52.157F2	6	VA	1	37	34	7	4	5.5
42483	H100_DRIL52.157F2_70	Chile16_69_2	45	6642	443	H100_DRIL52.157F2	6	VA	1	37	35	7	4	5.5
42484	H100	'	45	6643	970	H100	6	VA	1	37	36	7	4	5.5
42485	H100_DRIL52.157F2_3	Chile16_65_3	45	6644	376	H100_DRIL52.157F2	6	VA	1	37	37	7	4	5.5
42486	H100_DRIL52.157F2_59	Chile16_66_9	45	6645	432	H100_DRIL52.157F2	6	VA	1	37	38	7	4	5.5
42487	H100_DRIL52.157F2_60	Chile16_66_10	45	6646	433	H100_DRIL52.157F2	6	VA	1	37	39	7	4.5	5.75
42488	H100_DRIL52.157F2_51	Chile16_66_1	45	6647	424	H100_DRIL52.157F2	6	VA	1	37	40	7	4	5.5
42489	H100_DRIL52.157F2_16	Chile16_65_16	45	6648	389	H100_DRIL52.157F2	6	VA	1	37	41	7	4	5.5
42490	H100_DRIL52.157F2_19	Chile16_67_3	45	6649	392	H100_DRIL52.157F2	6	VA	1	37	42	7	4	5.5
42491	H100_DRIL52.157F2_1	Chile16_65_1	45	6650	374	H100_DRIL52.157F2	6	VA	1	37	43	6.5	3.5	5
42492	H100_DRIL52.157F2_73	Chile16_69_5	45	6651	446	H100_DRIL52.157F2	6	VA	1	37	44	7	4	5.5
42493	H100_DRIL52.157F2_37	Chile16_70_6	45	6652	410	H100_DRIL52.157F2	6	VA	1	37	45	7	4	5.5
42494	H100_DRIL52.157F2_45	Chile16_70_14	45	6653	418	H100_DRIL52.157F2	6	VA	1	37	46	7	3.5	5.25
42495	H100_DRIL52.157F2_101	Chile16_68_16	45	6654	474	H100_DRIL52.157F2	6	VA	1	37	47	7	4	5.5
42496	H100_DRIL52.157F2_56	Chile16_66_6	45	6655	429	H100_DRIL52.157F2	6	VA	1	37	48	7	4.5	5.75
42497	H100_DRIL52.157F2_90	Chile16_68_5	45	6656	463	H100_DRIL52.157F2	6	VA	1	37	49	7	4.5	5.75
42498	H100_DRIL52.157F2_11	Chile16_65_11	45	6657	384	H100_DRIL52.157F2	6	VA	1	37	50	7	4.5	5.75
42499	H100_DRIL52.157F2_89	Chile16_68_4	45	6658	462	H100_DRIL52.157F2	6	VA	1	37	51	7.5	4	5.75
42500	H100_DRIL52.157F2_32	Chile16_70_1	45	6659	405	H100_DRIL52.157F2	6	VA	1	37	52	7	4	5.5
42501	H100_DRIL52.157F2_2	Chile16_65_2	45	6660	375	H100_DRIL52.157F2	6	VA	1	37	53	7	3.5	5.25
42502	H100_DRIL52.157F2_53	Chile16_66_3	45	6661	426	H100_DRIL52.157F2	6	VA	1	37	54	7	4	5.5
42504	H100_DRIL52.157F2_66	Chile16_66_16	46	6662	439	H100_DRIL52.157F2	6	VA	1	37	56	7	4.5	5.75
42505	H100_DRIL52.157F2_31	Chile16_67_15	46	6663	404	H100_DRIL52.157F2	6	VA	1	37	57	7.5	5	6.25
42506	DRIL52.157	'	46	6664	962	DRIL52.157	6	VA	1	37	58	7	4	5.5
42507	H100_DRIL52.157F2_97	Chile16_68_12	46	6665	470	H100_DRIL52.157F2	6	VA	1	37	59	7	4	5.5
42508	H100_DRIL52.157F2_18	Chile16_67_2	46	6666	391	H100_DRIL52.157F2	6	VA	1	37	60	7	4	5.5
42509	H100_DRIL52.157F2_78	Chile16_69_10	46	6667	451	H100_DRIL52.157F2	6	VA	1	37	61	7	4.5	5.75
42510	H100_DRIL52.157F2_99	Chile16_68_14	46	6668	472	H100_DRIL52.157F2	6	VA	1	37	62	7	5	6
42511	H100_DRIL52.157F2_35	Chile16_70_4	46	6669	408	H100_DRIL52.157F2	6	VA	1	37	63	7	4	5.5
42512	H100_DRIL52.157F2_57	Chile16_66_7	46	6670	430	H100_DRIL52.157F2	6	VA	1	37	64	7	4	5.5
42513	H100_DRIL52.157F2_52	Chile16_66_2	46	6671	425	H100_DRIL52.157F2	6	VA	1	37	65	7	4	5.5
42514	H100_DRIL52.157F2_82	Chile16_69_14	46	6672	455	H100_DRIL52.157F2	6	VA	1	37	66	7.5	.	7.5
42515	H100_DRIL52.157F2_93	Chile16_68_8	46	6673	466	H100_DRIL52.157F2	6	VA	1	37	67	7	5	6
42516	H100_DRIL52.157F2_67	Chile16_66_17	46	6674	440	H100_DRIL52.157F2	6	VA	1	37	68	7.5	5	6.25
42517	H100_DRIL52.157F2_81	Chile16_69_13	46	6675	454	H100_DRIL52.157F2	6	VA	1	38	68	7	4	5.5
42518	H100_DRIL52.157F2_86	Chile16_68_1	46	6676	459	H100_DRIL52.157F2	6	VA	1	38	67	7	6	6.5
42519	H100	'	46	6677	970	H100	3	VA	1	38	66	7	3.5	5.25
42520	H100_DRIL32.134F2_61	Chile16_37_14	46	6678	217	H100_DRIL32.134F2	3	VA	1	38	65	7	4	5.5
42521	H100	'	46	6679	970	H100	3	VA	1	38	64	7	4	5.5
42522	H100_DRIL32.134F2_13	Chile16_35_13	46	6680	169	H100_DRIL32.134F2	3	VA	1	38	63	7	4	5.5
42523	H100_DRIL32.134F2_10	Chile16_35_10	46	6681	166	H100_DRIL32.134F2	3	VA	1	38	62	7.5	4	5.75
42524	H100_DRIL32.134F2_16	Chile16_36_1	46	6682	172	H100_DRIL32.134F2	3	VA	1	38	61	7	4	5.5
42525	H100_DRIL32.134F2_58	Chile16_37_11	47	6683	214	H100_DRIL32.134F2	3	VA	1	38	60	7.5	4	5.75
42526	H100_DRIL32.134F2_20	Chile16_36_5	47	6684	176	H100_DRIL32.134F2	3	VA	1	38	59	8	6	7
42527	H100_DRIL32.134F2_39	Chile16_38_2	47	6685	195	H100_DRIL32.134F2	3	VA	1	38	58	7	4	5.5
42528	H100_DRIL32.134F2_50	Chile16_37_3	47	6686	206	H100_DRIL32.134F2	3	VA	1	38	57	7.5	4	5.75
42529	H100_DRIL32.134F2_21	Chile16_36_6	47	6687	177	H100_DRIL32.134F2	3	VA	1	38	56	7.5	2.5	5
42530	H100_DRIL32.134F2_44	Chile16_38_7	47	6688	200	H100_DRIL32.134F2	3	VA	1	38	55	7.5	4	5.75
42531	H100_DRIL32.134F2_2	Chile16_35_2	47	6689	158	H100_DRIL32.134F2	3	VA	1	38	54	7	4	5.5
42532	H100	'	47	6690	970	H100	3	VA	1	38	53	7	4	5.5
42533	H100_DRIL32.134F2_6	Chile16_35_6	47	6691	162	H100_DRIL32.134F2	3	VA	1	38	52	7	2.5	4.75
42534	H100_DRIL32.134F2_32	Chile16_40_3	47	6692	188	H100_DRIL32.134F2	3	VA	1	38	51	7.5	5	6.25
42535	H100_DRIL32.134F2_55	Chile16_37_8	47	6693	211	H100_DRIL32.134F2	3	VA	1	38	50	7.5	4	5.75
42536	H100_DRIL32.134F2_22	Chile16_39_1	47	6694	178	H100_DRIL32.134F2	3	VA	1	38	49	7.5	4.5	6
42537	H100_DRIL32.134F2_54	Chile16_37_7	47	6695	210	H100_DRIL32.134F2	3	VA	1	38	48	7	4	5.5
42538	H100_DRIL32.134F2_25	Chile16_39_4	47	6696	181	H100_DRIL32.134F2	3	VA	1	38	47	7.5	4	5.75
42539	H100_DRIL32.134F2_63	Chile16_37_16	47	6697	219	H100_DRIL32.134F2	3	VA	1	38	46	7	4	5.5
42540	H100_DRIL32.134F2_26	Chile16_39_5	47	6698	182	H100_DRIL32.134F2	3	VA	1	38	45	7	4.5	5.75
42541	H100_DRIL32.134F2_29	Chile16_39_8	47	6699	185	H100_DRIL32.134F2	3	VA	1	38	44	7	4	5.5
42542	H100_DRIL32.134F2_19	Chile16_36_4	47	6700	175	H100_DRIL32.134F2	3	VA	1	38	43	7.5	5	6.25
42543	DRIL32.134	'	47	6701	959	DRIL32.134	3	VA	1	38	42	7.5	5	6.25
42544	H100_DRIL32.134F2_23	Chile16_39_2	47	6702	179	H100_DRIL32.134F2	3	VA	1	38	41	7	3.5	5.25
42545	H100_DRIL32.134F2_34	Chile16_40_5	47	6703	190	H100_DRIL32.134F2	3	VA	1	38	40	7	4	5.5
42546	H100_DRIL32.134F2_28	Chile16_39_7	48	6704	184	H100_DRIL32.134F2	3	VA	1	38	39	7	4	5.5
42547	H100_DRIL32.134F2_33	Chile16_40_4	48	6705	189	H100_DRIL32.134F2	3	VA	1	38	38	7.5	4	5.75
42548	H100_DRIL32.134F2_18	Chile16_36_3	48	6706	174	H100_DRIL32.134F2	3	VA	1	38	37	7	3.5	5.25
42549	H100_DRIL32.134F2_51	Chile16_37_4	48	6707	207	H100_DRIL32.134F2	3	VA	1	38	36	7.5	5.5	6.5
42550	H100	'	48	6708	970	H100	3	VA	1	38	35	7.5	4	5.75
42551	H100_DRIL32.134F2_36	Chile16_40_7	48	6709	192	H100_DRIL32.134F2	3	VA	1	38	34	7.5	5.5	6.5
42553	H100_DRIL32.134F2_7	Chile16_35_7	48	6711	163	H100_DRIL32.134F2	3	VA	1	38	32	7.5	5	6.25
42554	H100_DRIL32.134F2_35	Chile16_40_6	48	6712	191	H100_DRIL32.134F2	3	VA	1	38	31	7	4.5	5.75
42555	H100_DRIL32.134F2_47	Chile16_38_10	48	6713	203	H100_DRIL32.134F2	3	VA	1	38	30	6	3.5	4.75
42556	H100_DRIL32.134F2_30	Chile16_40_1	48	6714	186	H100_DRIL32.134F2	3	VA	1	38	29	7	3.5	5.25
42557	H100_DRIL32.134F2_46	Chile16_38_9	48	6715	202	H100_DRIL32.134F2	3	VA	1	38	28	7.5	3.5	5.5
42558	H100_DRIL32.134F2_42	Chile16_38_5	48	6716	198	H100_DRIL32.134F2	3	VA	1	38	27	7.5	4	5.75
42559	H100_DRIL32.134F2_14	Chile16_35_14	48	6717	170	H100_DRIL32.134F2	3	VA	1	38	26	7	4	5.5
42560	H100_DRIL32.134F2_27	Chile16_39_6	48	6718	183	H100_DRIL32.134F2	3	VA	1	38	25	7.5	4	5.75
42561	H100_DRIL32.134F2_24	Chile16_39_3	48	6719	180	H100_DRIL32.134F2	3	VA	1	38	24	7.5	5	6.25
42562	H100_DRIL32.134F2_3	Chile16_35_3	48	6720	159	H100_DRIL32.134F2	3	VA	1	38	23	7	4.5	5.75
42563	H100_DRIL32.134F2_9	Chile16_35_9	48	6721	165	H100_DRIL32.134F2	3	VA	1	38	22	7	5	6
42564	H100_DRIL32.134F2_49	Chile16_37_2	48	6722	205	H100_DRIL32.134F2	3	VA	1	38	21	7.5	4	5.75
42565	H100_DRIL32.134F2_45	Chile16_38_8	48	6723	201	H100_DRIL32.134F2	3	VA	1	38	20	7.5	4.5	6
42566	H100_DRIL32.134F2_1	Chile16_35_1	48	6724	157	H100_DRIL32.134F2	3	VA	1	38	19	7.5	5.5	6.5
42567	H100_DRIL32.134F2_41	Chile16_38_4	49	6725	197	H100_DRIL32.134F2	3	VA	1	38	18	7.5	5	6.25
42568	H100_DRIL32.134F2_43	Chile16_38_6	49	6726	199	H100_DRIL32.134F2	3	VA	1	38	17	7.5	5	6.25
42569	H100_DRIL32.134F2_12	Chile16_35_12	49	6727	168	H100_DRIL32.134F2	3	VA	1	39	16	7.5	4	5.75
42570	H100_DRIL32.134F2_15	Chile16_35_15	49	6728	171	H100_DRIL32.134F2	3	VA	1	39	15	7.5	5.5	6.5
42571	H100_DRIL32.134F2_8	Chile16_35_8	49	6729	164	H100_DRIL32.134F2	3	VA	1	38	14	7	4.5	5.75
42572	H100_DRIL32.134F2_37	Chile16_40_8	49	6730	193	H100_DRIL32.134F2	3	VA	1	38	13	7	5	6
42573	H100_DRIL32.134F2_62	Chile16_37_15	49	6731	218	H100_DRIL32.134F2	3	VA	1	38	12	6.5	3.5	5
42574	H100_DRIL32.134F2_40	Chile16_38_3	49	6732	196	H100_DRIL32.134F2	3	VA	1	38	11	7.5	4	5.75
42575	H100_DRIL32.134F2_17	Chile16_36_2	49	6733	173	H100_DRIL32.134F2	3	VA	1	38	10	7.5	4	5.75
42576	H100_DRIL32.134F2_53	Chile16_37_6	49	6734	209	H100_DRIL32.134F2	3	VA	1	38	9	7	4.5	5.75
42577	H100_DRIL32.134F2_31	Chile16_40_2	49	6735	187	H100_DRIL32.134F2	3	VA	1	38	8	7	4	5.5
42578	H100_DRIL32.134F2_38	Chile16_38_1	49	6736	194	H100_DRIL32.134F2	3	VA	1	38	7	7	4	5.5
42579	H100	'	49	6737	970	H100	3	VA	1	38	6	7	4	5.5
42580	H100_DRIL32.134F2_60	Chile16_37_13	49	6738	216	H100_DRIL32.134F2	3	VA	1	38	5	7.5	5	6.25
42581	H100_DRIL32.134F2_5	Chile16_35_5	49	6739	161	H100_DRIL32.134F2	3	VA	1	38	4	7	4	5.5
42582	H100_DRIL32.134F2_56	Chile16_37_9	49	6740	212	H100_DRIL32.134F2	3	VA	1	38	3	7	4	5.5
42583	H100_DRIL32.134F2_59	Chile16_37_12	49	6741	215	H100_DRIL32.134F2	3	VA	1	38	2	7	4	5.5
42584	H100_DRIL32.134F2_4	Chile16_35_4	49	6742	160	H100_DRIL32.134F2	3	VA	1	38	1	7.5	4.5	6
42585	H100_DRIL32.134F2_52	Chile16_37_5	49	6743	208	H100_DRIL32.134F2	3	VA	1	39	1	7.5	5	6.25
42586	H100_DRIL32.134F2_48	Chile16_37_1	49	6744	204	H100_DRIL32.134F2	3	VA	1	39	2	7.5	4.5	6
43209	H100_DRIL62.156F2_35	Chile16_103_3	1	6746	722	H100_DRIL62.156F2	10	VA	2	42	8	7.5	6.5	7
43210	H100_DRIL62.156F2_33	Chile16_103_1	1	6747	720	H100_DRIL62.156F2	10	VA	2	42	7	7.5	6	6.75
43211	H100_DRIL62.156F2_12	Chile16_101_2	1	6748	699	H100_DRIL62.156F2	10	VA	2	42	6	7.5	6	6.75
43212	H100_DRIL62.156F2_3	Chile16_100_3	1	6749	690	H100_DRIL62.156F2	10	VA	2	42	5	7	5	6
43213	H100_DRIL62.156F2_43	Chile16_104_1	1	6750	730	H100_DRIL62.156F2	10	VA	2	42	4	7.5	6	6.75
43214	H100	'	1	6751	970	H100	10	VA	2	42	3	7	4.5	5.75
43215	H100_DRIL62.156F2_31	Chile16_102_12	1	6752	718	H100_DRIL62.156F2	10	VA	2	42	2	7.5	6	6.75
43217	H100_DRIL62.156F2_56	Chile16_105_5	1	6754	743	H100_DRIL62.156F2	10	VA	2	43	1	8	7	7.5
43218	H100_DRIL62.156F2_22	Chile16_102_3	1	6755	709	H100_DRIL62.156F2	10	VA	2	43	2	7	5.5	6.25
43219	H100_DRIL62.156F2_34	Chile16_103_2	1	6756	721	H100_DRIL62.156F2	10	VA	2	43	3	6.5	5	5.75
43220	H100_DRIL62.156F2_16	Chile16_101_6	1	6757	703	H100_DRIL62.156F2	10	VA	2	43	4	7.5	6.5	7
43221	H100_DRIL62.156F2_63	Chile16_105_12	1	6758	750	H100_DRIL62.156F2	10	VA	2	43	5	7.5	6.5	7
43222	H100_DRIL62.156F2_48	Chile16_104_6	1	6759	735	H100_DRIL62.156F2	10	VA	2	43	6	7	5.5	6.25
43223	H100_DRIL62.156F2_5	Chile16_100_5	1	6760	692	H100_DRIL62.156F2	10	VA	2	43	7	7	4.5	5.75
43224	H100_DRIL62.156F2_37	Chile16_103_5	1	6761	724	H100_DRIL62.156F2	10	VA	2	43	8	7.5	6.5	7
43225	H100_DRIL62.156F2_40	Chile16_103_8	1	6762	727	H100_DRIL62.156F2	10	VA	2	43	9	7.5	6	6.75
43226	H100_DRIL62.156F2_23	Chile16_102_4	1	6763	710	H100_DRIL62.156F2	10	VA	2	43	10	7.5	5.5	6.5
43227	H100_DRIL62.156F2_38	Chile16_103_6	1	6764	725	H100_DRIL62.156F2	10	VA	2	43	11	7.5	6	6.75
43228	H100_DRIL62.156F2_52	Chile16_105_1	1	6765	739	H100_DRIL62.156F2	10	VA	2	43	12	7	5	6
43229	H100_DRIL62.156F2_24	Chile16_102_5	1	6766	711	H100_DRIL62.156F2	10	VA	2	43	13	7.5	6.5	7
43230	H100	'	2	6767	970	H100	10	VA	2	43	14	6.5	4	5.25
43231	H100_DRIL62.156F2_11	Chile16_101_1	2	6768	698	H100_DRIL62.156F2	10	VA	2	44	15	7	4	5.5
43232	H100_DRIL62.156F2_47	Chile16_104_5	2	6769	734	H100_DRIL62.156F2	10	VA	2	44	16	7.5	4.5	6
43233	H100_DRIL62.156F2_36	Chile16_103_4	2	6770	723	H100_DRIL62.156F2	10	VA	2	43	17	7.5	5.5	6.5
43234	H100_DRIL62.156F2_55	Chile16_105_4	2	6771	742	H100_DRIL62.156F2	10	VA	2	43	18	7.5	6	6.75
43235	H100_DRIL62.156F2_46	Chile16_104_4	2	6772	733	H100_DRIL62.156F2	10	VA	2	43	19	7.5	6	6.75
43236	H100_DRIL62.156F2_54	Chile16_105_3	2	6773	741	H100_DRIL62.156F2	10	VA	2	43	20	7.5	6.5	7
43237	H100_DRIL62.156F2_58	Chile16_105_7	2	6774	745	H100_DRIL62.156F2	10	VA	2	43	21	7	6	6.5
43238	H100_DRIL62.156F2_18	Chile16_101_8	2	6775	705	H100_DRIL62.156F2	10	VA	2	43	22	8	6.5	7.25
43239	H100_DRIL62.156F2_41	Chile16_103_9	2	6776	728	H100_DRIL62.156F2	10	VA	2	43	23	7.5	5.5	6.5
43240	H100_DRIL62.156F2_39	Chile16_103_7	2	6777	726	H100_DRIL62.156F2	10	VA	2	43	24	7.5	5.5	6.5
43241	H100_DRIL62.156F2_15	Chile16_101_5	2	6778	702	H100_DRIL62.156F2	10	VA	2	43	25	7	4.5	5.75
43242	H100_DRIL62.156F2_60	Chile16_105_9	2	6779	747	H100_DRIL62.156F2	10	VA	2	43	26	7.5	5.5	6.5
43243	H100_DRIL62.156F2_42	Chile16_103_10	2	6780	729	H100_DRIL62.156F2	10	VA	2	43	27	7.5	6.5	7
43244	H100_DRIL62.156F2_25	Chile16_102_6	2	6781	712	H100_DRIL62.156F2	10	VA	2	43	28	7.5	6	6.75
43245	H100_DRIL62.156F2_44	Chile16_104_2	2	6782	731	H100_DRIL62.156F2	10	VA	2	43	29	7	5.5	6.25
43246	H100_DRIL62.156F2_51	Chile16_104_9	2	6783	738	H100_DRIL62.156F2	10	VA	2	43	30	7.5	5	6.25
43247	H100_DRIL62.156F2_50	Chile16_104_8	2	6784	737	H100_DRIL62.156F2	10	VA	2	43	31	7.5	5.5	6.5
43248	DRIL62.156	'	2	6785	966	DRIL62.156	10	VA	2	43	32	7.5	.	7.5
43249	H100_DRIL62.156F2_62	Chile16_105_11	2	6786	749	H100_DRIL62.156F2	10	VA	2	43	33	7.5	5.5	6.5
43250	H100_DRIL62.156F2_57	Chile16_105_6	2	6787	744	H100_DRIL62.156F2	10	VA	2	43	34	7.5	6	6.75
43251	H100	'	3	6788	970	H100	10	VA	2	43	35	6	4	5
43252	H100_DRIL62.156F2_10	Chile16_100_10	3	6789	697	H100_DRIL62.156F2	10	VA	2	43	36	7.5	6.5	7
43253	H100_DRIL62.156F2_20	Chile16_102_1	3	6790	707	H100_DRIL62.156F2	10	VA	2	43	37	8	6.5	7.25
43254	H100_DRIL62.156F2_19	Chile16_101_9	3	6791	706	H100_DRIL62.156F2	10	VA	2	43	38	7	6	6.5
43255	H100_DRIL62.156F2_14	Chile16_101_4	3	6792	701	H100_DRIL62.156F2	10	VA	2	43	39	8	6	7
43256	H100	'	3	6793	970	H100	10	VA	2	43	40	6.5	4.5	5.5
43257	H100_DRIL62.156F2_27	Chile16_102_8	3	6794	714	H100_DRIL62.156F2	10	VA	2	43	41	7.5	7	7.25
43258	H100_DRIL62.156F2_8	Chile16_100_8	3	6795	695	H100_DRIL62.156F2	10	VA	2	43	42	7	5.5	6.25
43259	H100_DRIL62.156F2_30	Chile16_102_11	3	6796	717	H100_DRIL62.156F2	10	VA	2	43	43	7.5	5.5	6.5
43260	H100_DRIL62.156F2_29	Chile16_102_10	3	6797	716	H100_DRIL62.156F2	10	VA	2	43	44	8	7	7.5
43261	H100_DRIL62.156F2_59	Chile16_105_8	3	6798	746	H100_DRIL62.156F2	10	VA	2	43	45	8	7	7.5
43262	H100_DRIL62.156F2_21	Chile16_102_2	3	6799	708	H100_DRIL62.156F2	10	VA	2	43	46	7	5.5	6.25
43263	H100_DRIL62.156F2_26	Chile16_102_7	3	6800	713	H100_DRIL62.156F2	10	VA	2	43	47	8	7	7.5
43264	H100_DRIL62.156F2_2	Chile16_100_2	3	6801	689	H100_DRIL62.156F2	10	VA	2	43	48	8	7	7.5
43265	H100_DRIL62.156F2_53	Chile16_105_2	3	6802	740	H100_DRIL62.156F2	10	VA	2	43	49	7.5	6	6.75
43266	H100_DRIL62.156F2_1	Chile16_100_1	3	6803	688	H100_DRIL62.156F2	10	VA	2	43	50	8	7	7.5
43267	H100_DRIL62.156F2_9	Chile16_100_9	3	6804	696	H100_DRIL62.156F2	10	VA	2	43	51	7.5	7.5	7.5
43268	H100_DRIL62.156F2_17	Chile16_101_7	3	6805	704	H100_DRIL62.156F2	10	VA	2	43	52	7.5	.	7.5
43269	H100_DRIL62.156F2_28	Chile16_102_9	3	6806	715	H100_DRIL62.156F2	10	VA	2	43	53	8	6.5	7.25
43270	H100_DRIL62.156F2_61	Chile16_105_10	3	6807	748	H100_DRIL62.156F2	10	VA	2	43	54	8	7	7.5
43271	H100_DRIL62.156F2_45	Chile16_104_3	3	6808	732	H100_DRIL62.156F2	10	VA	2	43	55	8	6.5	7.25
43272	H100_DRIL62.156F2_32	Chile16_102_13	4	6809	719	H100_DRIL62.156F2	10	VA	2	43	56	7.5	5	6.25
43276	H100_DRIL62.156F2_4	Chile16_100_4	4	6813	691	H100_DRIL62.156F2	10	VA	2	43	60	7	5.5	6.25
43277	H100_DRIL52.268F2_73	Chile16_72_5	4	6814	547	H100_DRIL52.268F2	7	VA	2	43	61	6	4	5
43279	H100_DRIL52.268F2_31	Chile16_76_8	4	6816	505	H100_DRIL52.268F2	7	VA	2	43	63	7	5	6
43280	H100_DRIL52.268F2_19	Chile16_74_9	4	6817	493	H100_DRIL52.268F2	7	VA	2	43	64	6.5	5	5.75
43281	H100_DRIL52.268F2_35	Chile16_76_12	4	6818	509	H100_DRIL52.268F2	7	VA	2	43	65	7	5.5	6.25
43282	H100_DRIL52.268F2_60	Chile16_71_4	4	6819	534	H100_DRIL52.268F2	7	VA	2	43	66	6.5	.	6.5
43283	H100_DRIL52.268F2_30	Chile16_76_7	4	6820	504	H100_DRIL52.268F2	7	VA	2	43	67	6.5	5	5.75
43284	H100_DRIL52.268F2_37	Chile16_76_14	4	6821	511	H100_DRIL52.268F2	7	VA	2	43	68	7	.	7
43285	H100_DRIL52.268F2_72	Chile16_72_4	4	6822	546	H100_DRIL52.268F2	7	VA	2	44	68	7	5.5	6.25
43286	H100_DRIL52.268F2_75	Chile16_72_7	4	6823	549	H100_DRIL52.268F2	7	VA	2	44	67	7	5	6
43287	H100	'	4	6824	970	H100	7	VA	2	44	66	6.5	4	5.25
43288	H100_DRIL52.268F2_1	Chile16_75_1	4	6825	475	H100_DRIL52.268F2	7	VA	2	44	65	7	5.5	6.25
43289	H100_DRIL52.268F2_2	Chile16_75_2	4	6826	476	H100_DRIL52.268F2	7	VA	2	44	64	7	6.5	6.75
43290	H100_DRIL52.268F2_48	Chile16_73_8	4	6827	522	H100_DRIL52.268F2	7	VA	2	44	63	7	6	6.5
43291	H100_DRIL52.268F2_41	Chile16_73_1	4	6828	515	H100_DRIL52.268F2	7	VA	2	44	62	7.5	4.5	6
43292	H100_DRIL52.268F2_26	Chile16_76_3	4	6829	500	H100_DRIL52.268F2	7	VA	2	44	61	7.5	5	6.25
43293	H100_DRIL52.268F2_16	Chile16_74_6	5	6830	490	H100_DRIL52.268F2	7	VA	2	44	60	6	4	5
43294	H100_DRIL52.268F2_49	Chile16_73_9	5	6831	523	H100_DRIL52.268F2	7	VA	2	44	59	7.5	5.5	6.5
43295	H100_DRIL52.268F2_65	Chile16_71_9	5	6832	539	H100_DRIL52.268F2	7	VA	2	44	58	7.5	5	6.25
43296	H100_DRIL52.268F2_10	Chile16_75_10	5	6833	484	H100_DRIL52.268F2	7	VA	2	44	57	7.5	5.5	6.5
43297	H100_DRIL52.268F2_7	Chile16_75_7	5	6834	481	H100_DRIL52.268F2	7	VA	2	44	56	7	4	5.5
43298	H100_DRIL52.268F2_61	Chile16_71_5	5	6835	535	H100_DRIL52.268F2	7	VA	2	44	55	7	4	5.5
43299	H100_DRIL52.268F2_70	Chile16_72_2	5	6836	544	H100_DRIL52.268F2	7	VA	2	44	54	6	3	4.5
43300	H100_DRIL52.268F2_44	Chile16_73_4	5	6837	518	H100_DRIL52.268F2	7	VA	2	44	53	7	.	7
43301	H100_DRIL52.268F2_53	Chile16_73_13	5	6838	527	H100_DRIL52.268F2	7	VA	2	44	52	5.5	3.5	4.5
43302	H100	'	5	6839	970	H100	7	VA	2	44	51	5	.	5
43303	H100_DRIL52.268F2_74	Chile16_72_6	5	6840	548	H100_DRIL52.268F2	7	VA	2	44	50	7	3.5	5.25
43304	H100_DRIL52.268F2_59	Chile16_71_3	5	6841	533	H100_DRIL52.268F2	7	VA	2	44	49	7	4.5	5.75
43305	H100_DRIL52.268F2_3	Chile16_75_3	5	6842	477	H100_DRIL52.268F2	7	VA	2	44	48	7	3.5	5.25
43306	H100_DRIL52.268F2_34	Chile16_76_11	5	6843	508	H100_DRIL52.268F2	7	VA	2	44	47	7	5.5	6.25
43307	DRIL52.268	'	5	6844	963	DRIL52.268	7	VA	2	44	46	7	5.5	6.25
43308	H100_DRIL52.268F2_32	Chile16_76_9	5	6845	506	H100_DRIL52.268F2	7	VA	2	44	45	7	5	6
43309	H100_DRIL52.268F2_12	Chile16_74_2	5	6846	486	H100_DRIL52.268F2	7	VA	2	44	44	7	4	5.5
43310	H100_DRIL52.268F2_56	Chile16_73_16	5	6847	530	H100_DRIL52.268F2	7	VA	2	44	43	7.5	4.5	6
43311	H100_DRIL52.268F2_67	Chile16_71_11	5	6848	541	H100_DRIL52.268F2	7	VA	2	44	42	7	5.5	6.25
43312	H100_DRIL52.268F2_17	Chile16_74_7	5	6849	491	H100_DRIL52.268F2	7	VA	2	44	41	6.5	4.5	5.5
43313	H100_DRIL52.268F2_23	Chile16_74_13	5	6850	497	H100_DRIL52.268F2	7	VA	2	44	40	7.5	5.5	6.5
43315	H100_DRIL52.268F2_9	Chile16_75_9	6	6851	483	H100_DRIL52.268F2	7	VA	2	44	38	7.5	5.5	6.5
43316	H100_DRIL52.268F2_45	Chile16_73_5	6	6852	519	H100_DRIL52.268F2	7	VA	2	44	37	7	4.5	5.75
43317	H100_DRIL52.268F2_15	Chile16_74_5	6	6853	489	H100_DRIL52.268F2	7	VA	2	44	36	7.5	5.5	6.5
43318	H100_DRIL52.268F2_64	Chile16_71_8	6	6854	538	H100_DRIL52.268F2	7	VA	2	44	35	7	4.5	5.75
43319	H100_DRIL52.268F2_62	Chile16_71_6	6	6855	536	H100_DRIL52.268F2	7	VA	2	44	34	7.5	5.5	6.5
43320	H100_DRIL52.268F2_39	Chile16_76_16	6	6856	513	H100_DRIL52.268F2	7	VA	2	44	33	7	4.5	5.75
43321	H100_DRIL52.268F2_54	Chile16_73_14	6	6857	528	H100_DRIL52.268F2	7	VA	2	44	32	6.5	4	5.25
43322	H100_DRIL52.268F2_42	Chile16_73_2	6	6858	516	H100_DRIL52.268F2	7	VA	2	44	31	7	4.5	5.75
43323	H100_DRIL52.268F2_68	Chile16_71_12	6	6859	542	H100_DRIL52.268F2	7	VA	2	44	30	7	3.5	5.25
43324	H100_DRIL52.268F2_71	Chile16_72_3	6	6860	545	H100_DRIL52.268F2	7	VA	2	44	29	6.5	4.5	5.5
43325	H100	'	6	6861	970	H100	7	VA	2	44	28	7	4	5.5
43326	H100_DRIL52.268F2_14	Chile16_74_4	6	6862	488	H100_DRIL52.268F2	7	VA	2	44	27	7	4	5.5
43327	H100_DRIL52.268F2_40	Chile16_76_17	6	6863	514	H100_DRIL52.268F2	7	VA	2	44	26	7.5	6.5	7
43328	H100_DRIL52.268F2_6	Chile16_75_6	6	6864	480	H100_DRIL52.268F2	7	VA	2	44	25	7.5	4.5	6
43329	H100_DRIL52.268F2_8	Chile16_75_8	6	6865	482	H100_DRIL52.268F2	7	VA	2	44	24	7	4	5.5
43330	H100_DRIL52.268F2_58	Chile16_71_2	6	6866	532	H100_DRIL52.268F2	7	VA	2	44	23	7.5	6	6.75
43331	H100_DRIL52.268F2_51	Chile16_73_11	6	6867	525	H100_DRIL52.268F2	7	VA	2	44	22	7	4	5.5
43332	H100_DRIL52.268F2_28	Chile16_76_5	6	6868	502	H100_DRIL52.268F2	7	VA	2	44	21	7	4	5.5
43333	H100_DRIL52.268F2_18	Chile16_74_8	6	6869	492	H100_DRIL52.268F2	7	VA	2	44	20	7	4.5	5.75
43334	H100_DRIL52.268F2_55	Chile16_73_15	6	6870	529	H100_DRIL52.268F2	7	VA	2	44	19	7.5	5	6.25
43335	H100_DRIL52.268F2_20	Chile16_74_10	6	6871	494	H100_DRIL52.268F2	7	VA	2	44	18	7.5	4.5	6
43336	H100_DRIL52.268F2_25	Chile16_76_2	7	6872	499	H100_DRIL52.268F2	7	VA	2	44	17	7	4.5	5.75
43337	H100_DRIL52.268F2_47	Chile16_73_7	7	6873	521	H100_DRIL52.268F2	7	VA	2	45	16	6	4	5
43338	H100_DRIL52.268F2_43	Chile16_73_3	7	6874	517	H100_DRIL52.268F2	7	VA	2	45	15	7.5	4.5	6
43339	H100_DRIL52.268F2_21	Chile16_74_11	7	6875	495	H100_DRIL52.268F2	7	VA	2	44	14	6.5	4.5	5.5
43340	H100_DRIL52.268F2_69	Chile16_72_1	7	6876	543	H100_DRIL52.268F2	7	VA	2	44	13	7	5	6
43341	H100_DRIL52.268F2_36	Chile16_76_13	7	6877	510	H100_DRIL52.268F2	7	VA	2	44	12	6.5	4	5.25
43342	H100_DRIL52.268F2_57	Chile16_71_1	7	6878	531	H100_DRIL52.268F2	7	VA	2	44	11	7.5	4	5.75
43343	H100_DRIL52.268F2_11	Chile16_74_1	7	6879	485	H100_DRIL52.268F2	7	VA	2	44	10	7	4	5.5
43344	H100_DRIL52.268F2_63	Chile16_71_7	7	6880	537	H100_DRIL52.268F2	7	VA	2	44	9	7.5	4.5	6
43345	H100_DRIL52.268F2_13	Chile16_74_3	7	6881	487	H100_DRIL52.268F2	7	VA	2	44	8	7	5.5	6.25
43346	H100_DRIL52.268F2_76	Chile16_72_8	7	6882	550	H100_DRIL52.268F2	7	VA	2	44	7	7	4	5.5
43347	H100_DRIL52.268F2_66	Chile16_71_10	7	6883	540	H100_DRIL52.268F2	7	VA	2	44	6	6.5	3	4.75
43348	H100_DRIL52.268F2_4	Chile16_75_4	7	6884	478	H100_DRIL52.268F2	7	VA	2	44	5	6.5	4.5	5.5
43349	H100_DRIL52.268F2_46	Chile16_73_6	7	6885	520	H100_DRIL52.268F2	7	VA	2	44	4	7	4	5.5
43350	H100_DRIL52.268F2_27	Chile16_76_4	7	6886	501	H100_DRIL52.268F2	7	VA	2	44	3	7	5	6
43351	H100_DRIL52.268F2_5	Chile16_75_5	7	6887	479	H100_DRIL52.268F2	7	VA	2	44	2	6.5	5	5.75
43352	H100	'	7	6888	970	H100	7	VA	2	44	1	6	4	5
43353	H100_DRIL52.268F2_50	Chile16_73_10	7	6889	524	H100_DRIL52.268F2	7	VA	2	45	1	7.5	6	6.75
43354	H100_DRIL52.268F2_52	Chile16_73_12	7	6890	526	H100_DRIL52.268F2	7	VA	2	45	2	6.5	4	5.25
43355	H100_DRIL52.268F2_38	Chile16_76_15	7	6891	512	H100_DRIL52.268F2	7	VA	2	45	3	6.5	3.5	5
43356	H100_DRIL52.268F2_29	Chile16_76_6	7	6892	503	H100_DRIL52.268F2	7	VA	2	45	4	7	4	5.5
43357	H100	'	8	6893	970	H100	7	VA	2	45	5	6.5	4	5.25
43358	H100_DRIL52.268F2_24	Chile16_76_1	8	6894	498	H100_DRIL52.268F2	7	VA	2	45	6	7	5.5	6.25
43359	H100_DRIL52.268F2_22	Chile16_74_12	8	6895	496	H100_DRIL52.268F2	7	VA	2	45	7	7	4	5.5
43360	H100_DRIL52.268F2_77	Chile16_72_9	8	6896	551	H100_DRIL52.268F2	7	VA	2	45	8	6	4	5
43361	H100_DRIL72.061F2_1	Chile16_114_1	8	6897	815	H100_DRIL72.061F2	12	VA	2	45	9	8	6	7
43362	H100	'	8	6898	970	H100	12	VA	2	45	10	6	4	5
43363	H100_DRIL72.061F2_18	Chile16_112_7	8	6899	832	H100_DRIL72.061F2	12	VA	2	45	11	8	4.5	6.25
43365	H100_DRIL72.061F2_45	Chile16_115_10	8	6901	859	H100_DRIL72.061F2	12	VA	2	45	13	7	4.5	5.75
43366	H100_DRIL72.061F2_51	Chile16_115_16	8	6902	865	H100_DRIL72.061F2	12	VA	2	45	14	8	7	7.5
43367	H100_DRIL72.061F2_73	Chile16_117_6	8	6903	887	H100_DRIL72.061F2	12	VA	2	46	15	7.5	4.5	6
43368	H100_DRIL72.061F2_77	Chile16_117_10	8	6904	891	H100_DRIL72.061F2	12	VA	2	46	16	6.5	3.5	5
43369	H100_DRIL72.061F2_74	Chile16_117_7	8	6905	888	H100_DRIL72.061F2	12	VA	2	45	17	8	5	6.5
43370	H100_DRIL72.061F2_53	Chile16_115_18	8	6906	867	H100_DRIL72.061F2	12	VA	2	45	18	8	6.5	7.25
43371	H100_DRIL72.061F2_43	Chile16_115_8	8	6907	857	H100_DRIL72.061F2	12	VA	2	45	19	7.5	6.5	7
43372	H100_DRIL72.061F2_71	Chile16_117_4	8	6908	885	H100_DRIL72.061F2	12	VA	2	45	20	7.5	5.5	6.5
43373	H100_DRIL72.061F2_59	Chile16_116_6	8	6909	873	H100_DRIL72.061F2	12	VA	2	45	21	7.5	4	5.75
43374	H100_DRIL72.061F2_8	Chile16_114_8	8	6910	822	H100_DRIL72.061F2	12	VA	2	45	22	7	4	5.5
43375	H100_DRIL72.061F2_13	Chile16_112_2	8	6911	827	H100_DRIL72.061F2	12	VA	2	45	23	7.5	5	6.25
43376	H100_DRIL72.061F2_40	Chile16_115_5	8	6912	854	H100_DRIL72.061F2	12	VA	2	45	24	7	4	5.5
43377	H100_DRIL72.061F2_37	Chile16_115_2	8	6913	851	H100_DRIL72.061F2	12	VA	2	45	25	7.5	4	5.75
43378	H100_DRIL72.061F2_49	Chile16_115_14	9	6914	863	H100_DRIL72.061F2	12	VA	2	45	26	8.5	6	7.25
43379	H100_DRIL72.061F2_44	Chile16_115_9	9	6915	858	H100_DRIL72.061F2	12	VA	2	45	27	7.5	5.5	6.5
43380	H100_DRIL72.061F2_5	Chile16_114_5	9	6916	819	H100_DRIL72.061F2	12	VA	2	45	28	7.5	5.5	6.5
43381	H100_DRIL72.061F2_42	Chile16_115_7	9	6917	856	H100_DRIL72.061F2	12	VA	2	45	29	8	6	7
43382	H100_DRIL72.061F2_17	Chile16_112_6	9	6918	831	H100_DRIL72.061F2	12	VA	2	45	30	8	4	6
43383	H100_DRIL72.061F2_50	Chile16_115_15	9	6919	864	H100_DRIL72.061F2	12	VA	2	45	31	7.5	4.5	6
43384	H100_DRIL72.061F2_69	Chile16_117_2	9	6920	883	H100_DRIL72.061F2	12	VA	2	45	32	8	6	7
43385	H100_DRIL72.061F2_48	Chile16_115_13	9	6921	862	H100_DRIL72.061F2	12	VA	2	45	33	8.5	6	7.25
43386	H100_DRIL72.061F2_64	Chile16_116_11	9	6922	878	H100_DRIL72.061F2	12	VA	2	45	34	8	6	7
43387	H100_DRIL72.061F2_10	Chile16_114_10	9	6923	824	H100_DRIL72.061F2	12	VA	2	45	35	7	5.5	6.25
43388	H100_DRIL72.061F2_34	Chile16_113_11	9	6924	848	H100_DRIL72.061F2	12	VA	2	45	36	7.5	5.5	6.5
43389	H100_DRIL72.061F2_23	Chile16_112_12	9	6925	837	H100_DRIL72.061F2	12	VA	2	45	37	7.5	5.5	6.5
43390	H100_DRIL72.061F2_31	Chile16_113_8	9	6926	845	H100_DRIL72.061F2	12	VA	2	45	38	7	4.5	5.75
43391	H100_DRIL72.061F2_47	Chile16_115_12	9	6927	861	H100_DRIL72.061F2	12	VA	2	45	39	7.5	6	6.75
43392	H100_DRIL72.061F2_79	Chile16_117_12	9	6928	893	H100_DRIL72.061F2	12	VA	2	45	40	7.5	4.5	6
43393	H100	'	9	6929	970	H100	12	VA	2	45	41	7	4.5	5.75
43394	H100_DRIL72.061F2_26	Chile16_113_3	9	6930	840	H100_DRIL72.061F2	12	VA	2	45	42	8	6.5	7.25
43395	H100_DRIL72.061F2_54	Chile16_116_1	9	6931	868	H100_DRIL72.061F2	12	VA	2	45	43	7.5	4.5	6
43396	H100_DRIL72.061F2_30	Chile16_113_7	9	6932	844	H100_DRIL72.061F2	12	VA	2	45	44	8.5	5.5	7
43397	H100_DRIL72.061F2_21	Chile16_112_10	9	6933	835	H100_DRIL72.061F2	12	VA	2	45	45	8.5	6	7.25
43398	H100_DRIL72.061F2_33	Chile16_113_10	9	6934	847	H100_DRIL72.061F2	12	VA	2	45	46	6.5	5	5.75
43399	H100_DRIL72.061F2_68	Chile16_117_1	10	6935	882	H100_DRIL72.061F2	12	VA	2	45	47	7	5	6
43400	H100	'	10	6936	970	H100	12	VA	2	45	48	6	4	5
43401	H100_DRIL72.061F2_19	Chile16_112_8	10	6937	833	H100_DRIL72.061F2	12	VA	2	45	49	7.5	5	6.25
43402	H100_DRIL72.061F2_9	Chile16_114_9	10	6938	823	H100_DRIL72.061F2	12	VA	2	45	50	7.5	6.5	7
43403	H100_DRIL72.061F2_36	Chile16_115_1	10	6939	850	H100_DRIL72.061F2	12	VA	2	45	51	7	6.5	6.75
43404	H100_DRIL72.061F2_72	Chile16_117_5	10	6940	886	H100_DRIL72.061F2	12	VA	2	45	52	7.5	5.5	6.5
43405	H100_DRIL72.061F2_62	Chile16_116_9	10	6941	876	H100_DRIL72.061F2	12	VA	2	45	53	8	6	7
43406	H100_DRIL72.061F2_61	Chile16_116_8	10	6942	875	H100_DRIL72.061F2	12	VA	2	45	54	8	7	7.5
43407	H100_DRIL72.061F2_56	Chile16_116_3	10	6943	870	H100_DRIL72.061F2	12	VA	2	45	55	7.5	6	6.75
43408	H100_DRIL72.061F2_46	Chile16_115_11	10	6944	860	H100_DRIL72.061F2	12	VA	2	45	56	7	4	5.5
43409	H100_DRIL72.061F2_2	Chile16_114_2	10	6945	816	H100_DRIL72.061F2	12	VA	2	45	57	7.5	5	6.25
43410	H100_DRIL72.061F2_39	Chile16_115_4	10	6946	853	H100_DRIL72.061F2	12	VA	2	45	58	8	5.5	6.75
43411	H100_DRIL72.061F2_35	Chile16_113_12	10	6947	849	H100_DRIL72.061F2	12	VA	2	45	59	7.5	4.5	6
43413	H100_DRIL72.061F2_41	Chile16_115_6	10	6949	855	H100_DRIL72.061F2	12	VA	2	45	61	7.5	5	6.25
43414	H100_DRIL72.061F2_11	Chile16_114_11	10	6950	825	H100_DRIL72.061F2	12	VA	2	45	62	7.5	7	7.25
43415	H100_DRIL72.061F2_29	Chile16_113_6	10	6951	843	H100_DRIL72.061F2	12	VA	2	45	63	7	6	6.5
43416	H100_DRIL72.061F2_70	Chile16_117_3	10	6952	884	H100_DRIL72.061F2	12	VA	2	45	64	7	5	6
43417	H100_DRIL72.061F2_28	Chile16_113_5	10	6953	842	H100_DRIL72.061F2	12	VA	2	45	65	7	4.5	5.75
43418	H100_DRIL72.061F2_76	Chile16_117_9	10	6954	890	H100_DRIL72.061F2	12	VA	2	45	66	7.5	5.5	6.5
43419	H100_DRIL72.061F2_58	Chile16_116_5	10	6955	872	H100_DRIL72.061F2	12	VA	2	45	67	7	4	5.5
43421	H100_DRIL72.061F2_4	Chile16_114_4	11	6956	818	H100_DRIL72.061F2	12	VA	2	46	68	7.5	7	7.25
43422	H100_DRIL72.061F2_15	Chile16_112_4	11	6957	829	H100_DRIL72.061F2	12	VA	2	46	67	7.5	6.5	7
43423	H100_DRIL72.061F2_25	Chile16_113_2	11	6958	839	H100_DRIL72.061F2	12	VA	2	46	66	7	4.5	5.75
43424	H100_DRIL72.061F2_66	Chile16_116_13	11	6959	880	H100_DRIL72.061F2	12	VA	2	46	65	7.5	5.5	6.5
43425	H100_DRIL72.061F2_38	Chile16_115_3	11	6960	852	H100_DRIL72.061F2	12	VA	2	46	64	7.5	4.5	6
43426	H100_DRIL72.061F2_6	Chile16_114_6	11	6961	820	H100_DRIL72.061F2	12	VA	2	46	63	7	4.5	5.75
43427	H100_DRIL72.061F2_22	Chile16_112_11	11	6962	836	H100_DRIL72.061F2	12	VA	2	46	62	8	6.5	7.25
43428	H100	'	11	6963	970	H100	12	VA	2	46	61	7	4	5.5
43429	H100_DRIL72.061F2_65	Chile16_116_12	11	6964	879	H100_DRIL72.061F2	12	VA	2	46	60	7.5	5.5	6.5
43431	H100_DRIL72.061F2_16	Chile16_112_5	11	6966	830	H100_DRIL72.061F2	12	VA	2	46	58	8	6.5	7.25
43432	H100_DRIL72.061F2_12	Chile16_112_1	11	6967	826	H100_DRIL72.061F2	12	VA	2	46	57	7.5	5.5	6.5
43433	H100_DRIL72.061F2_60	Chile16_116_7	11	6968	874	H100_DRIL72.061F2	12	VA	2	46	56	7.5	5	6.25
43434	H100_DRIL72.061F2_14	Chile16_112_3	11	6969	828	H100_DRIL72.061F2	12	VA	2	46	55	7	4	5.5
43435	H100_DRIL72.061F2_20	Chile16_112_9	11	6970	834	H100_DRIL72.061F2	12	VA	2	46	54	7.5	4	5.75
43436	H100_DRIL72.061F2_32	Chile16_113_9	11	6971	846	H100_DRIL72.061F2	12	VA	2	46	53	7	4	5.5
43437	H100_DRIL72.061F2_78	Chile16_117_11	11	6972	892	H100_DRIL72.061F2	12	VA	2	46	52	7.5	5	6.25
43438	H100_DRIL72.061F2_67	Chile16_116_14	11	6973	881	H100_DRIL72.061F2	12	VA	2	46	51	7.5	4.5	6
43439	H100_DRIL72.061F2_57	Chile16_116_4	11	6974	871	H100_DRIL72.061F2	12	VA	2	46	50	7.5	4.5	6
43440	H100_DRIL72.061F2_52	Chile16_115_17	11	6975	866	H100_DRIL72.061F2	12	VA	2	46	49	7.5	4.5	6
43441	H100_DRIL72.061F2_7	Chile16_114_7	11	6976	821	H100_DRIL72.061F2	12	VA	2	46	48	7.5	5.5	6.5
43442	H100_DRIL72.061F2_63	Chile16_116_10	12	6977	877	H100_DRIL72.061F2	12	VA	2	46	47	7.5	4	5.75
43443	H100_DRIL72.061F2_75	Chile16_117_8	12	6978	889	H100_DRIL72.061F2	12	VA	2	46	46	7.5	5.5	6.5
43444	H100_DRIL72.061F2_24	Chile16_113_1	12	6979	838	H100_DRIL72.061F2	12	VA	2	46	45	7.5	4	5.75
43445	H100_DRIL72.061F2_3	Chile16_114_3	12	6980	817	H100_DRIL72.061F2	12	VA	2	46	44	7	4	5.5
43446	H100_DRIL52.157F2_66	Chile16_66_16	12	6981	439	H100_DRIL52.157F2	6	VA	2	46	43	7	4	5.5
43447	H100_DRIL52.157F2_30	Chile16_67_14	12	6982	403	H100_DRIL52.157F2	6	VA	2	46	42	7	4.5	5.75
43448	H100_DRIL52.157F2_5	Chile16_65_5	12	6983	378	H100_DRIL52.157F2	6	VA	2	46	41	7	4.5	5.75
43449	H100_DRIL52.157F2_91	Chile16_68_6	12	6984	464	H100_DRIL52.157F2	6	VA	2	46	40	6.5	4.5	5.5
43450	H100	'	12	6985	970	H100	6	VA	2	46	39	5.5	4	4.75
43451	H100_DRIL52.157F2_59	Chile16_66_9	12	6986	432	H100_DRIL52.157F2	6	VA	2	46	38	7	4	5.5
43452	H100_DRIL52.157F2_36	Chile16_70_5	12	6987	409	H100_DRIL52.157F2	6	VA	2	46	37	7	3.5	5.25
43453	H100_DRIL52.157F2_52	Chile16_66_2	12	6988	425	H100_DRIL52.157F2	6	VA	2	46	36	7	4.5	5.75
43454	H100_DRIL52.157F2_12	Chile16_65_12	12	6989	385	H100_DRIL52.157F2	6	VA	2	46	35	7	4	5.5
43455	H100_DRIL52.157F2_7	Chile16_65_7	12	6990	380	H100_DRIL52.157F2	6	VA	2	46	34	7	4	5.5
43456	H100_DRIL52.157F2_26	Chile16_67_10	12	6991	399	H100_DRIL52.157F2	6	VA	2	46	33	7	3.5	5.25
43457	H100_DRIL52.157F2_41	Chile16_70_10	12	6992	414	H100_DRIL52.157F2	6	VA	2	46	32	5.5	3.5	4.5
43458	H100_DRIL52.157F2_6	Chile16_65_6	12	6993	379	H100_DRIL52.157F2	6	VA	2	46	31	7	4	5.5
43459	H100_DRIL52.157F2_4	Chile16_65_4	12	6994	377	H100_DRIL52.157F2	6	VA	2	46	30	6.5	3.5	5
43460	H100_DRIL52.157F2_73	Chile16_69_5	12	6995	446	H100_DRIL52.157F2	6	VA	2	46	29	7	3.5	5.25
43461	H100_DRIL52.157F2_64	Chile16_66_14	12	6996	437	H100_DRIL52.157F2	6	VA	2	46	28	5.5	3.5	4.5
43462	H100_DRIL52.157F2_72	Chile16_69_4	12	6997	445	H100_DRIL52.157F2	6	VA	2	46	27	6.5	3.5	5
43463	H100	'	13	6998	970	H100	6	VA	2	46	26	6.5	3	4.75
43464	H100_DRIL52.157F2_47	Chile16_70_16	13	6999	420	H100_DRIL52.157F2	6	VA	2	46	25	6.5	3	4.75
43465	H100_DRIL52.157F2_93	Chile16_68_8	13	7000	466	H100_DRIL52.157F2	6	VA	2	46	24	6.5	4	5.25
43466	H100_DRIL52.157F2_13	Chile16_65_13	13	7001	386	H100_DRIL52.157F2	6	VA	2	46	23	7	4	5.5
43467	H100_DRIL52.157F2_86	Chile16_68_1	13	7002	459	H100_DRIL52.157F2	6	VA	2	46	22	7	4	5.5
43468	H100_DRIL52.157F2_53	Chile16_66_3	13	7003	426	H100_DRIL52.157F2	6	VA	2	46	21	6.5	4	5.25
43469	H100_DRIL52.157F2_27	Chile16_67_11	13	7004	400	H100_DRIL52.157F2	6	VA	2	46	20	6	3.5	4.75
43470	DRIL52.157	'	13	7005	962	DRIL52.157	6	VA	2	46	19	7	4.5	5.75
43471	H100_DRIL52.157F2_50	Chile16_70_19	13	7006	423	H100_DRIL52.157F2	6	VA	2	46	18	7	4	5.5
43472	H100_DRIL52.157F2_87	Chile16_68_2	13	7007	460	H100_DRIL52.157F2	6	VA	2	46	17	7.5	4.5	6
43473	H100_DRIL52.157F2_84	Chile16_69_16	13	7008	457	H100_DRIL52.157F2	6	VA	2	47	16	7	4	5.5
43474	H100_DRIL52.157F2_11	Chile16_65_11	13	7009	384	H100_DRIL52.157F2	6	VA	2	47	15	7	4	5.5
43475	H100_DRIL52.157F2_70	Chile16_69_2	13	7010	443	H100_DRIL52.157F2	6	VA	2	46	14	7	3.5	5.25
43476	H100_DRIL52.157F2_63	Chile16_66_13	13	7011	436	H100_DRIL52.157F2	6	VA	2	46	13	7	4.5	5.75
43477	H100_DRIL52.157F2_32	Chile16_70_1	13	7012	405	H100_DRIL52.157F2	6	VA	2	46	12	7	4.5	5.75
43478	H100_DRIL52.157F2_94	Chile16_68_9	13	7013	467	H100_DRIL52.157F2	6	VA	2	46	11	7.5	4.5	6
43479	H100_DRIL52.157F2_43	Chile16_70_12	13	7014	416	H100_DRIL52.157F2	6	VA	2	46	10	7	4	5.5
43480	H100_DRIL52.157F2_74	Chile16_69_6	13	7015	447	H100_DRIL52.157F2	6	VA	2	46	9	7.5	4.5	6
43481	H100_DRIL52.157F2_51	Chile16_66_1	13	7016	424	H100_DRIL52.157F2	6	VA	2	46	8	7	4	5.5
43482	H100_DRIL52.157F2_17	Chile16_67_1	13	7017	390	H100_DRIL52.157F2	6	VA	2	46	7	7	4	5.5
43483	H100_DRIL52.157F2_14	Chile16_65_14	13	7018	387	H100_DRIL52.157F2	6	VA	2	46	6	7	3	5
43484	H100_DRIL52.157F2_82	Chile16_69_14	14	7019	455	H100_DRIL52.157F2	6	VA	2	46	5	6.5	4	5.25
43485	H100_DRIL52.157F2_79	Chile16_69_11	14	7020	452	H100_DRIL52.157F2	6	VA	2	46	4	6.5	4	5.25
43486	H100_DRIL52.157F2_2	Chile16_65_2	14	7021	375	H100_DRIL52.157F2	6	VA	2	46	3	6.5	4	5.25
43487	H100_DRIL52.157F2_46	Chile16_70_15	14	7022	419	H100_DRIL52.157F2	6	VA	2	46	2	6.5	3.5	5
43488	H100	'	14	7023	970	H100	6	VA	2	46	1	7	3.5	5.25
43489	H100_DRIL52.157F2_10	Chile16_65_10	14	7024	383	H100_DRIL52.157F2	6	VA	2	47	1	6	4	5
43490	H100	'	14	7025	970	H100	6	VA	2	47	2	7	4	5.5
43491	H100_DRIL52.157F2_55	Chile16_66_5	14	7026	428	H100_DRIL52.157F2	6	VA	2	47	3	7	4.5	5.75
43492	H100_DRIL52.157F2_68	Chile16_66_18	14	7027	441	H100_DRIL52.157F2	6	VA	2	47	4	7	4	5.5
43493	H100_DRIL52.157F2_78	Chile16_69_10	14	7028	451	H100_DRIL52.157F2	6	VA	2	47	5	7	4.5	5.75
43494	H100_DRIL52.157F2_39	Chile16_70_8	14	7029	412	H100_DRIL52.157F2	6	VA	2	47	6	7	4	5.5
43495	H100_DRIL52.157F2_9	Chile16_65_9	14	7030	382	H100_DRIL52.157F2	6	VA	2	47	7	7	4.5	5.75
43496	H100_DRIL52.157F2_62	Chile16_66_12	14	7031	435	H100_DRIL52.157F2	6	VA	2	47	8	7	4	5.5
43497	H100_DRIL52.157F2_58	Chile16_66_8	14	7032	431	H100_DRIL52.157F2	6	VA	2	47	9	7	4	5.5
43498	H100_DRIL52.157F2_101	Chile16_68_16	14	7033	474	H100_DRIL52.157F2	6	VA	2	47	10	7	4	5.5
43499	H100_DRIL52.157F2_80	Chile16_69_12	14	7034	453	H100_DRIL52.157F2	6	VA	2	47	11	7	4	5.5
43500	H100_DRIL52.157F2_35	Chile16_70_4	14	7035	408	H100_DRIL52.157F2	6	VA	2	47	12	7	4	5.5
43501	H100_DRIL52.157F2_71	Chile16_69_3	14	7036	444	H100_DRIL52.157F2	6	VA	2	47	13	7	4	5.5
43502	H100_DRIL52.157F2_85	Chile16_69_17	14	7037	458	H100_DRIL52.157F2	6	VA	2	47	14	7.5	4.5	6
43503	H100_DRIL52.157F2_33	Chile16_70_2	14	7038	406	H100_DRIL52.157F2	6	VA	2	48	15	7	4	5.5
43504	H100_DRIL52.157F2_40	Chile16_70_9	14	7039	413	H100_DRIL52.157F2	6	VA	2	48	16	8	5.5	6.75
43505	H100_DRIL52.157F2_83	Chile16_69_15	15	7040	456	H100_DRIL52.157F2	6	VA	2	47	17	7	4.5	5.75
43506	H100_DRIL52.157F2_34	Chile16_70_3	15	7041	407	H100_DRIL52.157F2	6	VA	2	47	18	7	4.5	5.75
43507	H100_DRIL52.157F2_69	Chile16_69_1	15	7042	442	H100_DRIL52.157F2	6	VA	2	47	19	7.5	5	6.25
43508	H100_DRIL52.157F2_98	Chile16_68_13	15	7043	471	H100_DRIL52.157F2	6	VA	2	47	20	7	4	5.5
43509	H100_DRIL52.157F2_8	Chile16_65_8	15	7044	381	H100_DRIL52.157F2	6	VA	2	47	21	6.5	4	5.25
43510	H100	'	15	7045	970	H100	6	VA	2	47	22	6.5	3.5	5
43511	H100_DRIL52.157F2_54	Chile16_66_4	15	7046	427	H100_DRIL52.157F2	6	VA	2	47	23	6.5	3.5	5
43512	H100_DRIL52.157F2_76	Chile16_69_8	15	7047	449	H100_DRIL52.157F2	6	VA	2	47	24	6.5	3.5	5
43513	H100_DRIL52.157F2_45	Chile16_70_14	15	7048	418	H100_DRIL52.157F2	6	VA	2	47	25	7.5	4	5.75
43514	H100_DRIL52.157F2_67	Chile16_66_17	15	7049	440	H100_DRIL52.157F2	6	VA	2	47	26	6.5	3.5	5
43515	H100_DRIL52.157F2_92	Chile16_68_7	15	7050	465	H100_DRIL52.157F2	6	VA	2	47	27	6.5	3.5	5
43516	H100_DRIL52.157F2_18	Chile16_67_2	15	7051	391	H100_DRIL52.157F2	6	VA	2	47	28	6.5	4	5.25
43517	H100_DRIL52.157F2_1	Chile16_65_1	15	7052	374	H100_DRIL52.157F2	6	VA	2	47	29	7.5	4	5.75
43518	H100_DRIL52.157F2_77	Chile16_69_9	15	7053	450	H100_DRIL52.157F2	6	VA	2	47	30	7	4	5.5
43519	H100_DRIL52.157F2_95	Chile16_68_10	15	7054	468	H100_DRIL52.157F2	6	VA	2	47	31	7	3.5	5.25
43520	H100_DRIL52.157F2_89	Chile16_68_4	15	7055	462	H100_DRIL52.157F2	6	VA	2	47	32	7	4	5.5
43521	H100_DRIL52.157F2_37	Chile16_70_6	15	7056	410	H100_DRIL52.157F2	6	VA	2	47	33	7.5	5.5	6.5
43522	H100_DRIL52.157F2_29	Chile16_67_13	15	7057	402	H100_DRIL52.157F2	6	VA	2	47	34	7	4.5	5.75
43523	H100_DRIL52.157F2_42	Chile16_70_11	15	7058	415	H100_DRIL52.157F2	6	VA	2	47	35	7	5.5	6.25
43524	H100_DRIL52.157F2_3	Chile16_65_3	15	7059	376	H100_DRIL52.157F2	6	VA	2	47	36	7	5	6
43525	H100_DRIL52.157F2_90	Chile16_68_5	15	7060	463	H100_DRIL52.157F2	6	VA	2	47	37	7	4	5.5
43527	H100_DRIL52.157F2_99	Chile16_68_14	16	7061	472	H100_DRIL52.157F2	6	VA	2	47	39	7.5	5.5	6.5
43528	H100_DRIL52.157F2_48	Chile16_70_17	16	7062	421	H100_DRIL52.157F2	6	VA	2	47	40	7.5	4.5	6
43529	H100_DRIL52.157F2_25	Chile16_67_9	16	7063	398	H100_DRIL52.157F2	6	VA	2	47	41	7	5.5	6.25
43530	H100_DRIL52.157F2_44	Chile16_70_13	16	7064	417	H100_DRIL52.157F2	6	VA	2	47	42	7	5	6
43531	H100_DRIL52.157F2_97	Chile16_68_12	16	7065	470	H100_DRIL52.157F2	6	VA	2	47	43	7.5	4.5	6
43532	H100_DRIL52.157F2_28	Chile16_67_12	16	7066	401	H100_DRIL52.157F2	6	VA	2	47	44	7.5	5	6.25
43534	H100_DRIL52.157F2_88	Chile16_68_3	16	7068	461	H100_DRIL52.157F2	6	VA	2	47	46	7.5	5.5	6.5
43535	H100_DRIL52.157F2_100	Chile16_68_15	16	7069	473	H100_DRIL52.157F2	6	VA	2	47	47	7	5	6
43536	H100_DRIL52.157F2_56	Chile16_66_6	16	7070	429	H100_DRIL52.157F2	6	VA	2	47	48	7	4.5	5.75
43537	H100_DRIL52.157F2_16	Chile16_65_16	16	7071	389	H100_DRIL52.157F2	6	VA	2	47	49	7	4.5	5.75
43538	H100_DRIL52.157F2_23	Chile16_67_7	16	7072	396	H100_DRIL52.157F2	6	VA	2	47	50	7.5	5	6.25
43539	H100_DRIL52.157F2_60	Chile16_66_10	16	7073	433	H100_DRIL52.157F2	6	VA	2	47	51	6	4	5
43540	H100_DRIL52.157F2_24	Chile16_67_8	16	7074	397	H100_DRIL52.157F2	6	VA	2	47	52	7	5	6
43541	H100_DRIL52.157F2_19	Chile16_67_3	16	7075	392	H100_DRIL52.157F2	6	VA	2	47	53	7.5	5	6.25
43542	H100_DRIL52.157F2_81	Chile16_69_13	16	7076	454	H100_DRIL52.157F2	6	VA	2	47	54	7	4	5.5
43543	H100_DRIL52.157F2_31	Chile16_67_15	16	7077	404	H100_DRIL52.157F2	6	VA	2	47	55	7.5	5	6.25
43544	H100_DRIL52.157F2_20	Chile16_67_4	16	7078	393	H100_DRIL52.157F2	6	VA	2	47	56	7	4.5	5.75
43545	H100	'	16	7079	970	H100	6	VA	2	47	57	7	4.5	5.75
43546	H100_DRIL52.157F2_75	Chile16_69_7	16	7080	448	H100_DRIL52.157F2	6	VA	2	47	58	7	4.5	5.75
43547	H100_DRIL52.157F2_22	Chile16_67_6	16	7081	395	H100_DRIL52.157F2	6	VA	2	47	59	7	4.5	5.75
43548	H100_DRIL52.157F2_21	Chile16_67_5	17	7082	394	H100_DRIL52.157F2	6	VA	2	47	60	7.5	4.5	6
43549	H100_DRIL52.157F2_15	Chile16_65_15	17	7083	388	H100_DRIL52.157F2	6	VA	2	47	61	7.5	5.5	6.5
43550	H100_DRIL52.157F2_49	Chile16_70_18	17	7084	422	H100_DRIL52.157F2	6	VA	2	47	62	7	5	6
43551	H100_DRIL52.157F2_96	Chile16_68_11	17	7085	469	H100_DRIL52.157F2	6	VA	2	47	63	6.5	4.5	5.5
43552	H100_DRIL52.157F2_38	Chile16_70_7	17	7086	411	H100_DRIL52.157F2	6	VA	2	47	64	6.5	4.5	5.5
43553	H100_DRIL52.157F2_57	Chile16_66_7	17	7087	430	H100_DRIL52.157F2	6	VA	2	47	65	7	4.5	5.75
43554	H100_DRIL52.157F2_61	Chile16_66_11	17	7088	434	H100_DRIL52.157F2	6	VA	2	47	66	7	4.5	5.75
43555	H100_DRIL52.055F2_21	Chile16_56_14	17	7089	326	H100_DRIL52.055F2	5	VA	2	47	67	7.5	6.5	7
43556	H100_DRIL52.055F2_29	Chile16_58_8	17	7090	334	H100_DRIL52.055F2	5	VA	2	47	68	8	7	7.5
43557	H100_DRIL52.055F2_68	Chile16_55_7	17	7091	373	H100_DRIL52.055F2	5	VA	2	48	68	8	6	7
43558	H100_DRIL52.055F2_35	Chile16_54_1	17	7092	340	H100_DRIL52.055F2	5	VA	2	48	67	8	6.5	7.25
43559	H100_DRIL52.055F2_65	Chile16_55_4	17	7093	370	H100_DRIL52.055F2	5	VA	2	48	66	8	6.5	7.25
43560	DRIL52.055	'	17	7094	961	DRIL52.055	5	VA	2	48	65	7.5	6.5	7
43561	H100	'	17	7095	970	H100	5	VA	2	48	64	6.5	4	5.25
43562	H100_DRIL52.055F2_25	Chile16_58_4	17	7096	330	H100_DRIL52.055F2	5	VA	2	48	63	7.5	4.5	6
43563	H100_DRIL52.055F2_62	Chile16_55_1	17	7097	367	H100_DRIL52.055F2	5	VA	2	48	62	7.5	5	6.25
43564	H100_DRIL52.055F2_22	Chile16_58_1	17	7098	327	H100_DRIL52.055F2	5	VA	2	48	61	7	5.5	6.25
43566	H100_DRIL52.055F2_60	Chile16_57_18	17	7100	365	H100_DRIL52.055F2	5	VA	2	48	59	7	4.5	5.75
43567	H100_DRIL52.055F2_5	Chile16_53_5	17	7101	310	H100_DRIL52.055F2	5	VA	2	48	58	8.5	6	7.25
43568	H100_DRIL52.055F2_64	Chile16_55_3	17	7102	369	H100_DRIL52.055F2	5	VA	2	48	57	7	4.5	5.75
43569	H100_DRIL52.055F2_10	Chile16_56_3	18	7103	315	H100_DRIL52.055F2	5	VA	2	48	56	7	4.5	5.75
43570	H100_DRIL52.055F2_50	Chile16_57_8	18	7104	355	H100_DRIL52.055F2	5	VA	2	48	55	8	6	7
43572	H100_DRIL52.055F2_24	Chile16_58_3	18	7106	329	H100_DRIL52.055F2	5	VA	2	48	53	7.5	6	6.75
43573	H100_DRIL52.055F2_40	Chile16_54_6	18	7107	345	H100_DRIL52.055F2	5	VA	2	48	52	7	6	6.5
43574	H100_DRIL52.055F2_61	Chile16_57_19	18	7108	366	H100_DRIL52.055F2	5	VA	2	48	51	7.5	5.5	6.5
43575	H100_DRIL52.055F2_38	Chile16_54_4	18	7109	343	H100_DRIL52.055F2	5	VA	2	48	50	7	5	6
43576	H100_DRIL52.055F2_18	Chile16_56_11	18	7110	323	H100_DRIL52.055F2	5	VA	2	48	49	7.5	6	6.75
43582	H100_DRIL52.055F2_9	Chile16_56_2	18	7116	314	H100_DRIL52.055F2	5	VA	2	48	43	8	5.5	6.75
43583	H100	'	18	7117	970	H100	5	VA	2	48	42	7	4.5	5.75
43584	H100_DRIL52.055F2_58	Chile16_57_16	18	7118	363	H100_DRIL52.055F2	5	VA	2	48	41	7.5	6	6.75
43585	H100_DRIL52.055F2_19	Chile16_56_12	18	7119	324	H100_DRIL52.055F2	5	VA	2	48	40	7.5	6	6.75
43587	H100_DRIL52.055F2_17	Chile16_56_10	18	7121	322	H100_DRIL52.055F2	5	VA	2	48	38	7.5	6	6.75
43588	H100_DRIL52.055F2_16	Chile16_56_9	18	7122	321	H100_DRIL52.055F2	5	VA	2	48	37	7.5	5.5	6.5
43589	H100_DRIL52.055F2_56	Chile16_57_14	18	7123	361	H100_DRIL52.055F2	5	VA	2	48	36	7.5	5.5	6.5
43590	H100_DRIL52.055F2_32	Chile16_58_11	19	7124	337	H100_DRIL52.055F2	5	VA	2	48	35	8	6	7
43591	H100_DRIL52.055F2_45	Chile16_57_3	19	7125	350	H100_DRIL52.055F2	5	VA	2	48	34	7.5	6	6.75
43592	H100	'	19	7126	970	H100	5	VA	2	48	33	7	4	5.5
43593	H100_DRIL52.055F2_27	Chile16_58_6	19	7127	332	H100_DRIL52.055F2	5	VA	2	48	32	7.5	3.5	5.5
43594	H100_DRIL52.055F2_39	Chile16_54_5	19	7128	344	H100_DRIL52.055F2	5	VA	2	48	31	7.5	5	6.25
43595	H100_DRIL52.055F2_33	Chile16_58_12	19	7129	338	H100_DRIL52.055F2	5	VA	2	48	30	7.5	5	6.25
43596	H100_DRIL52.055F2_31	Chile16_58_10	19	7130	336	H100_DRIL52.055F2	5	VA	2	48	29	7	4	5.5
43597	H100_DRIL52.055F2_66	Chile16_55_5	19	7131	371	H100_DRIL52.055F2	5	VA	2	48	28	7	5	6
43598	H100_DRIL52.055F2_67	Chile16_55_6	19	7132	372	H100_DRIL52.055F2	5	VA	2	48	27	7.5	5	6.25
43599	H100_DRIL52.055F2_63	Chile16_55_2	19	7133	368	H100_DRIL52.055F2	5	VA	2	48	26	7.5	4	5.75
43600	H100_DRIL52.055F2_23	Chile16_58_2	19	7134	328	H100_DRIL52.055F2	5	VA	2	48	25	8	5	6.5
43601	H100_DRIL52.055F2_28	Chile16_58_7	19	7135	333	H100_DRIL52.055F2	5	VA	2	48	24	7.5	5	6.25
43602	H100_DRIL52.055F2_12	Chile16_56_5	19	7136	317	H100_DRIL52.055F2	5	VA	2	48	23	7.5	4	5.75
43603	H100_DRIL52.055F2_46	Chile16_57_4	19	7137	351	H100_DRIL52.055F2	5	VA	2	48	22	7.5	3.5	5.5
43604	H100_DRIL52.055F2_1	Chile16_53_1	19	7138	306	H100_DRIL52.055F2	5	VA	2	48	21	7	4	5.5
43605	H100_DRIL52.055F2_7	Chile16_53_7	19	7139	312	H100_DRIL52.055F2	5	VA	2	48	20	7.5	4	5.75
43606	H100_DRIL52.055F2_37	Chile16_54_3	19	7140	342	H100_DRIL52.055F2	5	VA	2	48	19	7.5	6	6.75
43607	H100_DRIL52.055F2_14	Chile16_56_7	19	7141	319	H100_DRIL52.055F2	5	VA	2	48	18	7.5	5	6.25
43608	H100_DRIL52.055F2_26	Chile16_58_5	19	7142	331	H100_DRIL52.055F2	5	VA	2	48	17	7.5	5	6.25
43609	H100_DRIL52.055F2_3	Chile16_53_3	19	7143	308	H100_DRIL52.055F2	5	VA	2	49	16	8	5.5	6.75
43610	H100_DRIL52.055F2_41	Chile16_54_7	19	7144	346	H100_DRIL52.055F2	5	VA	2	49	15	7.5	5.5	6.5
43611	H100_DRIL52.055F2_6	Chile16_53_6	20	7145	311	H100_DRIL52.055F2	5	VA	2	48	14	7.5	5.5	6.5
43612	H100_DRIL52.055F2_43	Chile16_57_1	20	7146	348	H100_DRIL52.055F2	5	VA	2	48	13	7.5	6	6.75
43613	H100_DRIL52.055F2_15	Chile16_56_8	20	7147	320	H100_DRIL52.055F2	5	VA	2	48	12	7.5	4	5.75
43614	H100_DRIL52.055F2_59	Chile16_57_17	20	7148	364	H100_DRIL52.055F2	5	VA	2	48	11	7.5	4	5.75
43615	H100_DRIL52.055F2_34	Chile16_58_13	20	7149	339	H100_DRIL52.055F2	5	VA	2	48	10	8	6	7
[truncated: 583 more rows]
